# Supplementary material for: Rhodium(iii)-catalyzed C–H activation and intermolecular annulation with terminal alkynes: from indoles to carbazoles
Source: Royal Society of Chemistry journal article supplement (doi:10.1039/c4cc09823d), 2015-01-01
Supplement: c4cc09823d1.pdf [file c4cc09823d1.pdf]

(83 pages)

**Supporting Information For**  
**Rhodium(III)-catalyzed C–H activation and**  
**intermolecular annulation with terminal alkynes:**  
**from indoles to carbazoles**

Jinlong Jia,<sup>a,b+</sup> Jingjing Shi,<sup>a+</sup> Jie Zhou,<sup>a,c</sup> Xuelei Liu,<sup>a</sup> Yanling Song,<sup>b</sup> H. Eric Xu<sup>\*a,d</sup>  
and Wei Yi<sup>\*a</sup>

<sup>a</sup>*VARI/SIMM Center, Center for Structure and Function of Drug Targets,  
CAS-Key Laboratory of Receptor Research, Shanghai Institute of Materia Medica,  
Chinese Academy of Sciences, Shanghai 201203, P.R. China.*

*Fax: +86-21-20231000-1715; Tel: 86-21-20231000-1715*

<sup>b</sup>*College of Pharmaceutical and Biological Engineering, Shenyang University of  
Chemical Technology, Shenyang 110142, P.R. China*

<sup>c</sup>*School of Chemistry and Chemical Engineering, Sun Yat-sen University, Guangzhou  
510275, P.R. China*

<sup>d</sup>*Laboratory of Structural Sciences, Program on Structural Biology and Drug  
Discovery, Van Andel Research Institute, Grand Rapids, Michigan 49503, USA  
E-mail: yiwei.simm@simmm.ac.cn, eric.xu@simmm.ac.cn*

<sup>+</sup> *J. Jia and J. Shi contributed equally to this work.*

**Table of contents**

|                                                                                                                 |         |
|-----------------------------------------------------------------------------------------------------------------|---------|
| General methods and materials .....                                                                             | S2      |
| Preliminary optimization studies .....                                                                          | S3      |
| General procedure for C–H activation and intermolecular annulation .....                                        | S4      |
| General procedure for deprotection .....                                                                        | S4      |
| Procedure for the synthesis of <b>3ab</b> via intermediate <b>5</b> .....                                       | S5      |
| Procedure for estimation of the reversibility of the C–H activation step .....                                  | S6      |
| Proposed mechanism .....                                                                                        | S7      |
| Procedure for the synthesis of <b>6-7</b> .....                                                                 | S8      |
| Characterizations of products <b>3aa-3qa</b> , <b>3ab-3as</b> and <b>4-7</b> .....                              | S9-S31  |
| References .....                                                                                                | S32     |
| <sup>1</sup> H and <sup>13</sup> C NMR spectra of products <b>3aa-3qa</b> , <b>3ab-3as</b> and <b>4-7</b> ..... | S33-S71 |
| Crystal data and structure refinement for <b>3aa</b> .....                                                      | S72-S83 |

**General methods and materials:**

[Cp\*RhCl<sub>2</sub>]<sub>2</sub> and AgSbF<sub>6</sub> were purchased from Adamas-beta and used without further purification. [Cp\*Rh(MeCN)<sub>3</sub>](SbF<sub>6</sub>)<sub>2</sub>,<sup>1</sup> [Cp\*Rh(OAc)<sub>2</sub>]<sub>2</sub><sup>2</sup> and substrates 1-(pyrimidin-2-yl)-1*H*-indoles<sup>3-5</sup> were synthesized according to published procedures. Other chemicals were purchased from commercial suppliers and were dried and purified when necessary. The water used was re-distilled and ion-free. Melting points were determined on a WRS-1B digital instrument without correction. <sup>1</sup>H and <sup>13</sup>C NMR spectra were recorded on Varian Mercury-Plus 400 NMR instruments (<sup>1</sup>H 400 MHz; <sup>13</sup>C 100 MHz or <sup>13</sup>C 125 MHz ) in CDCl<sub>3</sub>. Abbreviations for data quoted are s, singlet; brs, broad singlet; d, doublet; t, triplet; dd, doublet of doublets; m, multiplet. Infrared Spectroscopy were recorded on Nicolet 6700 FT-IR spectrometer; Mass spectra and high-resolution mass spectra were measured on Thermo-DFS mass spectrometer. Thin-layer chromatographies were done on pre-coated silica gel 60 F254 plates (Merck). Silica gel 60H (200-300 mesh) manufactured by Qingdao Haiyang Chemical Group Co. (China) was used for general chromatography.

### Preliminary optimization studies:

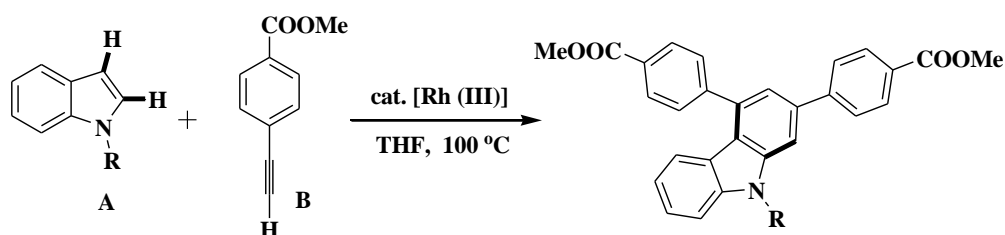

### Effects of directing group, Rh(III) species and reaction stoichiometry

Standard procedure: substrate A (0.10 mmol, 1.0 equiv), substrate B (0.12 mmol, 1.2 equiv), THF (2.0 mL), 12 h, under air. Isolated yields were given.

**Table S1**

| Entry             | R                    | Catalyst system (mol %)                                                          | Yield (%) |
|-------------------|----------------------|----------------------------------------------------------------------------------|-----------|
| 1                 | H                    | [Cp*Rh <sup>III</sup> (MeCN) <sub>3</sub> ](SbF <sub>6</sub> ) <sub>2</sub> (10) | 0         |
| 2                 | Me                   | [Cp*Rh <sup>III</sup> (MeCN) <sub>3</sub> ](SbF <sub>6</sub> ) <sub>2</sub> (10) | 0         |
| 3                 | Boc                  | [Cp*Rh <sup>III</sup> (MeCN) <sub>3</sub> ](SbF <sub>6</sub> ) <sub>2</sub> (10) | 0         |
| 4                 | CON(Me) <sub>2</sub> | [Cp*Rh <sup>III</sup> (MeCN) <sub>3</sub> ](SbF <sub>6</sub> ) <sub>2</sub> (10) | 0         |
| 5                 | 2-Pyrimidyl          | [Cp*Rh <sup>III</sup> (MeCN) <sub>3</sub> ](SbF <sub>6</sub> ) <sub>2</sub> (10) | 36        |
| 6 <sup>[a]</sup>  | 2-Pyrimidyl          | [Cp*Rh <sup>III</sup> (MeCN) <sub>3</sub> ](SbF <sub>6</sub> ) <sub>2</sub> (10) | 51        |
| 7 <sup>[a]</sup>  | 2-Pyrimidyl          | [Cp*Rh(OAc) <sub>2</sub> ] <sub>2</sub> (10)                                     | 0         |
| 8 <sup>[a]</sup>  | 2-Pyrimidyl          | [Cp*RhCl <sub>2</sub> ] <sub>2</sub> (10)                                        | 0         |
| 9 <sup>[a]</sup>  | 2-Pyrimidyl          | [Cp*RhCl <sub>2</sub> ] <sub>2</sub> (10)+Cu(OAc) <sub>2</sub> (100)             | 0         |
| 10 <sup>[a]</sup> | 2-Pyrimidyl          | [Cp*RhCl <sub>2</sub> ] <sub>2</sub> (10)+AgOAc(100)                             | 10        |

[a] A (0.10 mmol, 1.0 equiv) and B (0.22 mmol, 2.2 equiv) were used.

A survey of directing group revealed that the 2-pyrimidyl group was optimal for the reaction outcome (Table S1, entries 1-5). Screening of Rh(III) species showed that [Cp\*Rh<sup>III</sup>(MeCN)<sub>3</sub>](SbF<sub>6</sub>)<sub>2</sub> complex was the most effective (Table S1, entries 6-10). Investigation of reaction stoichiometry demonstrated that the ratio of 1: 2.2 was better than that of 1: 1.2 (Table S1, entries 5-6). Based on these results, we carried out further reaction optimization including solvent, reaction temperature, catalyst loading, and concentration. For more detailed information, please see Table 1 in the main text.

### General procedure for C–H activation and intermolecular annulation:

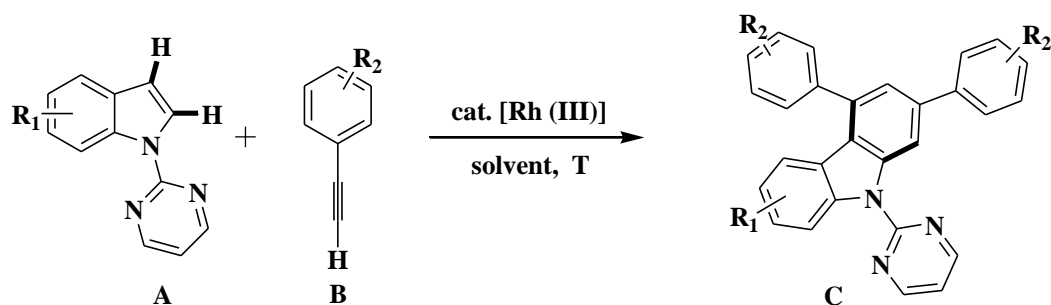

The mixture of  $[Cp^*Rh(MeCN)_3][SbF_6]_2$  (8.3 mg, 0.01 mmol, 10 mol%), substrate A (0.10 mmol, 1.0 equiv), substrate B (0.22 mmol, 2.2 equiv) and dioxane (2.0 mL) were stirred at 80 °C for 12 h under air. The resulting mixture was cooled to room temperature, silica gel column directly to give the desired products **3aa-3qa** and **3ab-3as**.

### Procedure for deprotection:

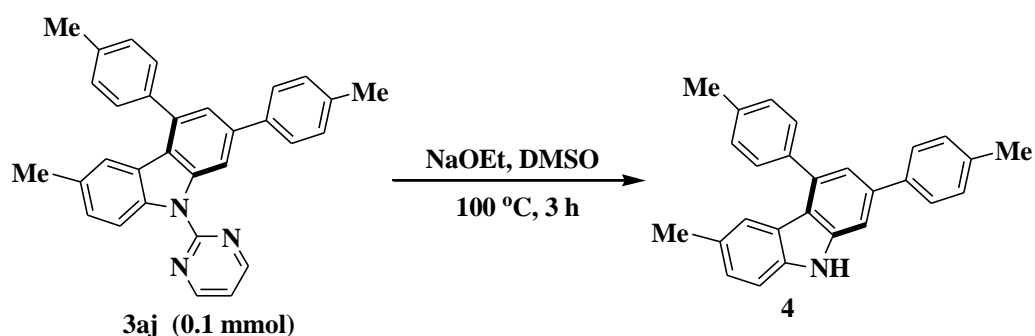

A suspension of **3aj** (44 mg, 0.1 mmol) and  $NaOEt$  (34 mg, 0.5 mmol) in dry  $DMSO$  (1.0 mL) under  $N_2$  was stirred at 100 °C until consumption of the starting material (3 h). It was allowed to reach room temperature, diluted with  $EtOAc$  (10 mL) and washed brine. The combined organic phase was dried ( $Na_2SO_4$ ). After evaporation of the solvents under reduced pressure, the crude product was purified on a silica gel column to afford the desired free-NH carbazole **4**.

**Procedure for the synthesis of 3ab via intermediate 5:**

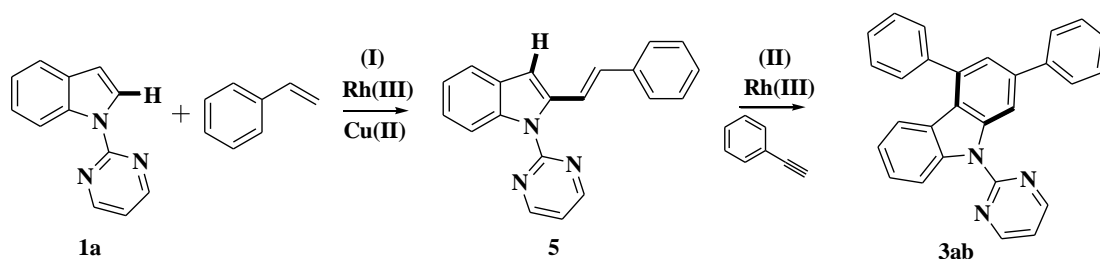

(I) C2-Alkenylated indole **5** was synthesized by the reported procedure<sup>6</sup> with slight modifications. Briefly, a mixture of **1a** (0.3 mmol, 1.0 equiv), [Cp\*Rh(CH<sub>3</sub>CN)<sub>3</sub>][SbF<sub>6</sub>]<sub>2</sub> (5.00 mg, 0.006 mmol, 2.0 mol%), Cu(OAc)<sub>2</sub>·H<sub>2</sub>O (0.60 mmol, 2.0 equiv) and styrene (0.9 mmol, 3.0 equiv) was combined in a Schlenk tube followed by addition of THF (2.0 mL) under Ar. Then the reaction mixture was heated to 100 °C with stirring for 24 h. The resulting mixture was cooled to room temperature, silica gel column directly to give the desired intermediate **5**.

(II) The mixture of [Cp\*Rh(MeCN)<sub>3</sub>][SbF<sub>6</sub>]<sub>2</sub> (8.3 mg, 0.01 mmol, 10 mol%), **5** (0.10 mmol, 1.0 equiv), phenylacetylene (0.12 mmol, 1.2 equiv) and dioxane (2.0 mL) were stirred at 80 °C for 2 h under air. The resulting mixture was cooled to room temperature, silica gel column directly to give the desired product **3ab** with 18% yield.

**Procedure for estimation of the reversibility of the C–H activation step:**

The mixture of [Cp\*Rh(MeCN)<sub>3</sub>][SbF<sub>6</sub>]<sub>2</sub> (8.3 mg, 0.01mmol, 0.10 equiv), **1a** (0.10 mmol, 1.0 equiv) and Dioxane/D<sub>2</sub>O (2.0 mL, 20:1) were stirred at 80 °C for 1 h under air. The resulting mixture was cooled to room temperature, concentrated under reduced pressure and analyzed by <sup>1</sup>H NMR without purification. C2- and C3-positions of indole core were deuterated 74% and 68% respectively.

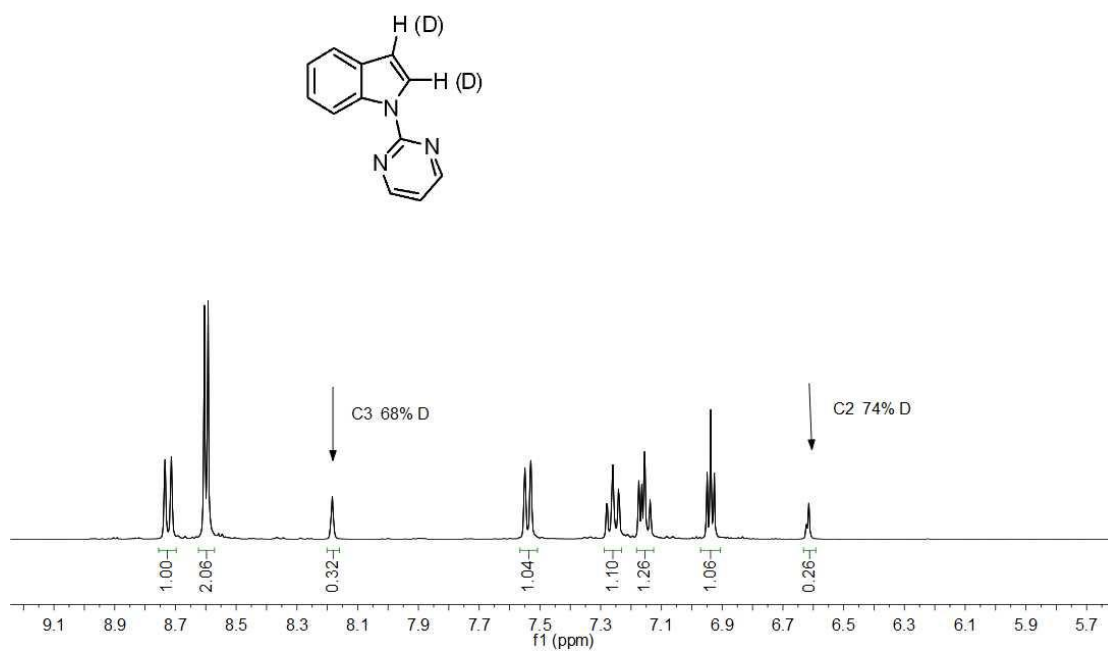

## Proposed mechanism:

Taken together these results and literature precedent, a plausible reaction mechanism is proposed as bellow:

C2-H activation (I) followed by C3-H activation (II) of indoles

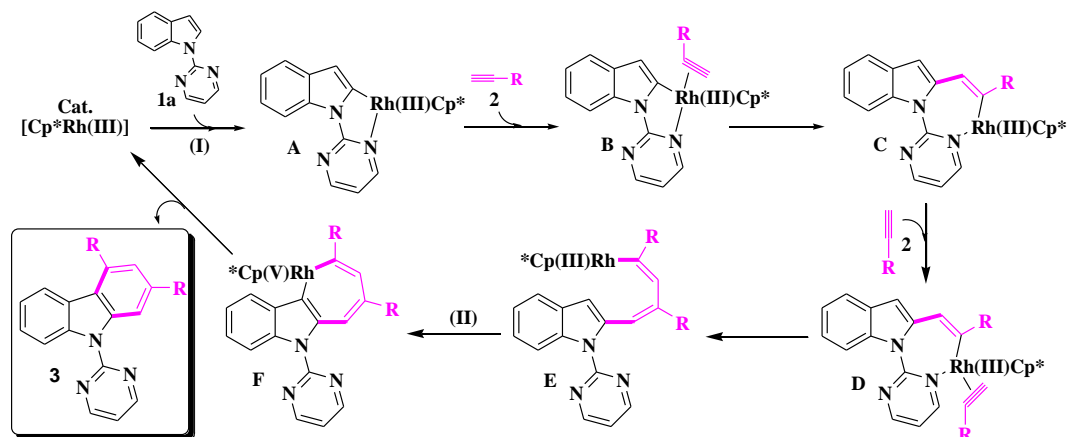

First, the coordination of C2-position of *N*-2-pyrimidyl indole **1a** to a [Cp\*Rh(III)] species is the key step for the regioselective C2–H bond cleavage of indole to form a five-membered rhodacycle **A**. This rhodacycle can coordinate one equivalent of terminal alkyne **2** to afford **B**. Subsequently, insertion of alkyne **2** into the Rh–C bond gives a seven-membered rhodacycle **C**, followed by the coordination and the regionselective alkyne insertion once again to give **D** and **E**, respectively. Then intermediate **E** undergoes further coordination with the C3-position of indole core to provide the seven-membered rhodacycle **F**. Reductive elimination<sup>7</sup> of **F** delivers the desired carbazoles **3** and the active Rh(III) catalyst.

### Procedure for the synthesis of 6:

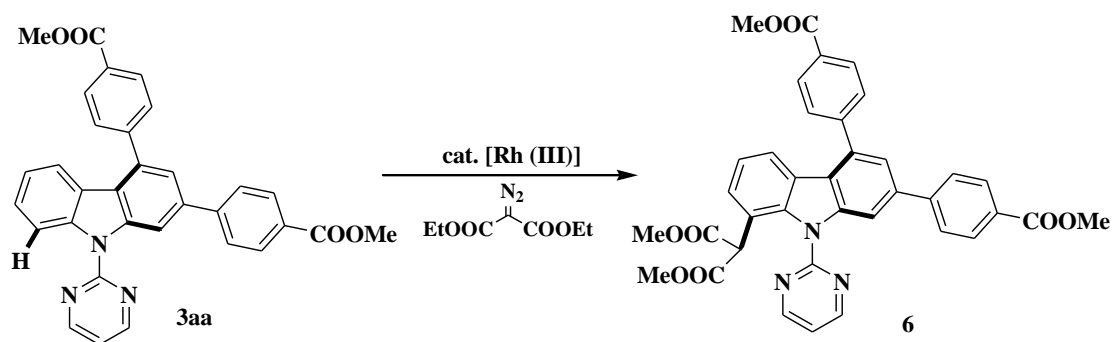

A mixture of **3aa** (0.1 mmol, 1.0 equiv),  $[\text{Cp}^*\text{RhCl}_2]_2$  (0.005 mmol, 5.0 mol%),  $\text{AgSbF}_6$  (0.01 mmol, 10 mol%) and diethyl 2-diazomalonate (0.12 mmol, 1.2 equiv) was combined in a Schlenk tube followed by addition of EtOH (1.0 mL). Then the reaction mixture was heated to 80 °C with stirring for 6 h. The resulting mixture was cooled to room temperature, silica gel column directly to give the desired product **6**.

### Procedure for the synthesis of 7:

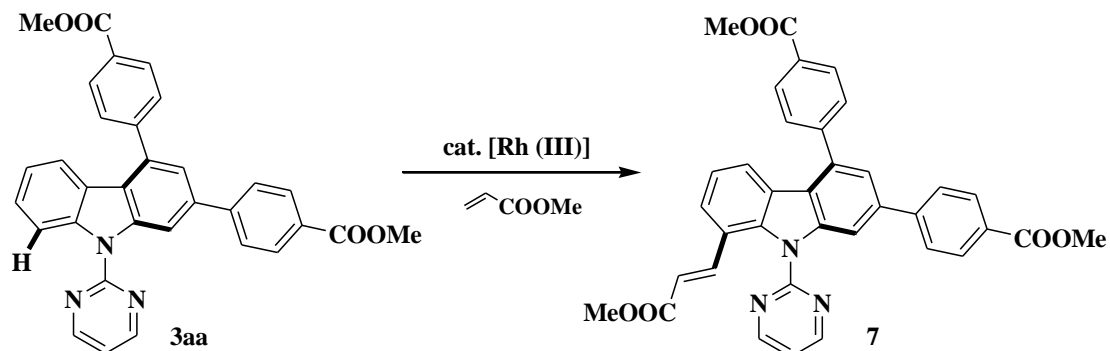

A mixture of **3aa** (0.1 mmol, 1.0 equiv),  $[\text{Cp}^*\text{RhCl}_2]_2$  (0.005 mmol, 5.0 mol%),  $\text{AgSbF}_6$  (0.01 mmol, 10 mol%),  $\text{Cu(OAc)}_2$  (0.1 mmol, 1.0 equiv) and methyl acrylate (0.12 mmol, 1.2 equiv) was combined in a Schlenk tube followed by addition of DMF (1.0 mL). Then the reaction mixture was heated to 80 °C with stirring for 8 h. It was allowed to reach room temperature, diluted with EtOAc (10 mL) and washed brine. The combined organic phase was dried ( $\text{Na}_2\text{SO}_4$ ). After evaporation of the solvents under reduced pressure, the crude product was purified on a silica gel column to give the desired product **7**.



### Characterizations of products 3aa-3qa, 3ab-3as and 4-7:

(The data of yield, Mp,  $^1\text{H}$  NMR,  $^{13}\text{C}$  NMR, IR and HRMS of each compound were given)

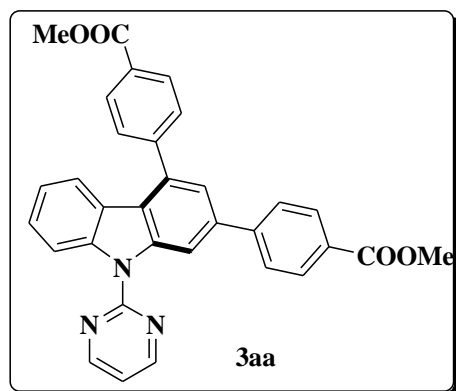

Yield 85%; Mp 180-181 °C;  $^1\text{H}$  NMR (400 MHz,  $\text{CDCl}_3$ )  $\delta$ : 9.18 (d,  $J = 1.4$  Hz, 1H), 8.92 (d,  $J = 4.8$  Hz, 2H), 8.81 (d,  $J = 8.4$  Hz, 1H), 8.25 (d,  $J = 8.2$  Hz, 2H), 8.15 (d,  $J = 8.4$  Hz, 2H), 7.84 (d,  $J = 8.4$  Hz, 2H), 7.74 (d,  $J = 8.2$  Hz, 2H), 7.49 – 7.44 (m, 2H), 7.31 (d,  $J = 7.8$  Hz, 1H), 7.22 (t,  $J = 4.8$  Hz, 1H), 7.10 (t,  $J = 7.4$  Hz, 1H), 4.02 (s, 3H), 3.97 (s, 3H);  $^{13}\text{C}$  NMR (100 MHz,  $\text{CDCl}_3$ )  $\delta$ : 167.1, 159.0, 158.1, 146.1, 145.6, 140.1, 140.0, 138.1, 136.4, 130.1, 129.9, 129.6, 129.5, 128.8, 127.5, 126.8, 124.6, 123.2, 122.7, 122.1, 121.9, 116.7, 115.7, 114.0, 52.3, 52.2; IR (ATR): 2949, 1718, 1606, 1577, 1562, 1486, 1454, 1430, 1332, 1280, 1187, 1105, 848, 769; HRMS (EI) calcd for  $\text{C}_{32}\text{H}_{23}\text{N}_3\text{O}_4$ : 513.1689 ( $[\text{M}]^+$ ), found 513.1678 ( $[\text{M}]^+$ ).

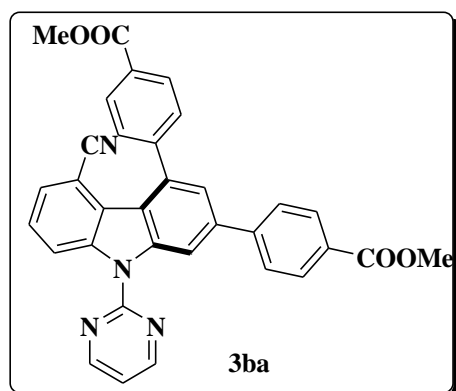

Yield 31%; Mp 245-246 °C;  $^1\text{H}$  NMR (400 MHz,  $\text{CDCl}_3$ )  $\delta$ : 9.06 (d,  $J = 1.6$  Hz, 1H), 9.02 (dd,  $J = 8.2, 1.0$  Hz, 1H), 8.98 (d,  $J = 4.8$  Hz, 2H), 8.25 (d,  $J = 8.2$  Hz, 2H), 8.17 (d,  $J = 8.4$  Hz, 2H), 7.83 (d,  $J = 8.4$  Hz, 2H), 7.73 (d,  $J = 8.2$  Hz, 2H), 7.59 – 7.50 (m,

3H), 7.34 (t,  $J = 4.8$  Hz, 1H), 3.98 (s, 3H), 3.98 (s, 3H);  $^{13}\text{C}$  NMR (100 MHz,  $\text{CDCl}_3$ )  $\delta$ : 167.0, 166.9, 158.4, 158.2, 146.5, 145.3, 141.1, 140.5, 139.8, 137.8, 130.7, 130.2, 130.1, 130.1, 129.3, 129.2, 127.6, 126.3, 125.0, 124.3, 120.2, 119.5, 117.8, 117.2, 113.0, 105.7, 52.2, 52.1; IR (ATR): 2950, 2225, 1714, 1606, 1569, 1423, 1409, 1276, 1191, 1110, 856, 769; HRMS (EI) calcd for  $\text{C}_{33}\text{H}_{22}\text{N}_4\text{O}_4$ : 538.1641 ( $[\text{M}]^+$ ), found 538.1641 ( $[\text{M}]^+$ ).

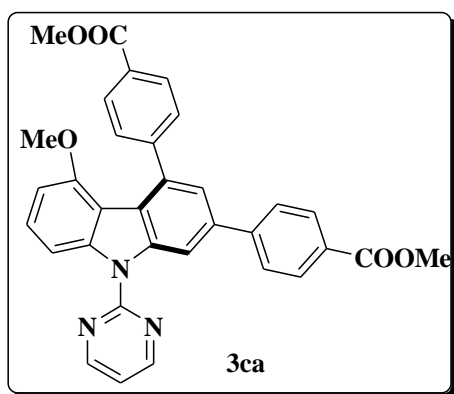

Yield 82%; Mp 210-211 °C;  $^1\text{H}$  NMR (400 MHz,  $\text{CDCl}_3$ )  $\delta$ : 9.02 (d,  $J = 1.2$  Hz, 1H), 8.94 (d,  $J = 4.6$  Hz, 2H), 8.29 (d,  $J = 8.4$  Hz, 1H), 8.14 – 8.11 (m, 4H), 7.82 (d,  $J = 8.4$  Hz, 2H), 7.56 (d,  $J = 8.2$  Hz, 2H), 7.49 (d,  $J = 1.2$  Hz, 1H), 7.41 (t,  $J = 8.2$  Hz, 1H), 7.26 – 7.24 (m, 1H), 6.62 (d,  $J = 8.0$  Hz, 1H), 3.99 (s, 3H), 3.95 (s, 3H), 3.18 (s, 3H);  $^{13}\text{C}$  NMR (100 MHz,  $\text{CDCl}_3$ )  $\delta$ : 165.4, 165.1, 156.7, 156.2, 152.6, 148.0, 144.0, 139.6, 137.9, 134.9, 134.9, 128.0, 127.1, 126.7, 126.1, 125.9, 125.9, 125.4, 122.3, 120.3, 115.1, 111.7, 110.4, 105.1, 101.4, 52.5, 50.1; IR (ATR): 3363, 2923, 2852, 1718, 1706, 1606, 1575, 1562, 1440, 1415, 1334, 1274, 1108, 848, 771; HRMS (EI) calcd for  $\text{C}_{33}\text{H}_{25}\text{N}_3\text{O}_5$ : 543.1794 ( $[\text{M}]^+$ ), found 543.1792 ( $[\text{M}]^+$ ).

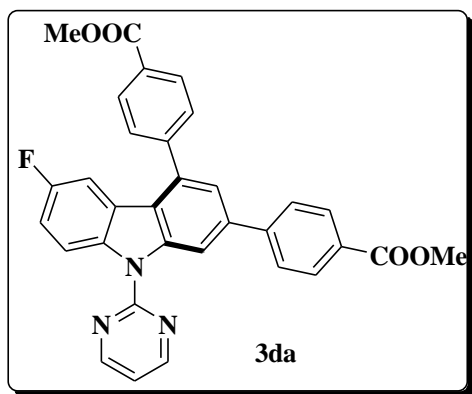

Yield 88%; Mp 179-180 °C;  $^1\text{H}$  NMR (400 MHz,  $\text{CDCl}_3$ )  $\delta$ : 9.22 (s, 1H), 8.92 – 8.83 (m, 3H), 8.27 (d,  $J = 7.2$  Hz, 2H), 8.17 (d,  $J = 7.6$  Hz, 2H), 7.85 (d,  $J = 7.6$  Hz, 2H), 7.72 (d,  $J = 7.2$  Hz, 2H), 7.49 (s, 1H), 7.27 – 7.12 (m, 2H), 6.96 (d,  $J = 8.4$  Hz, 1H), 4.04 (s, 3H), 3.98 (s, 3H);  $^{13}\text{C}$  NMR (100 MHz,  $\text{CDCl}_3$ )  $\delta$ : 167.0, 166.9, 158.8, 158.1, 158.0 (d,  $J = 167.7$  Hz), 145.9, 145.0, 140.8, 138.7, 136.5, 136.3, 130.1, 130.1, 129.9, 129.3, 129.0, 127.6, 125.5 (d,  $J = 9.6$  Hz), 123.2, 122.0 (d,  $J = 3.6$  Hz), 116.9 (d,  $J = 8.4$  Hz), 116.7, 114.4, 114.2 (d,  $J = 24.1$  Hz), 107.7 (d,  $J = 25.1$  Hz), 52.3, 52.2; IR (ATR): 3359, 3187, 2921, 2850, 1722, 1658, 1633, 1432, 1276, 1187, 1101, 1018, 850, 771; HRMS (EI) calcd for  $\text{C}_{32}\text{H}_{22}\text{FN}_3\text{O}_4$ : 531.1594 ( $[\text{M}]^+$ ), found 531.1597 ( $[\text{M}]^+$ ).

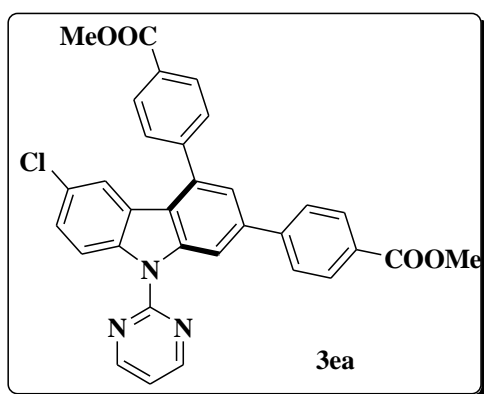

Yield 86%; Mp 222-223 °C;  $^1\text{H}$  NMR (400 MHz,  $\text{CDCl}_3$ )  $\delta$ : 9.20 (d,  $J = 1.6$  Hz, 1H), 8.92 (d,  $J = 4.8$  Hz, 2H), 8.79 (d,  $J = 9.0$  Hz, 1H), 8.28 (d,  $J = 8.2$  Hz, 2H), 8.17 (d,  $J = 8.4$  Hz, 2H), 7.84 (d,  $J = 8.4$  Hz, 2H), 7.73 (d,  $J = 8.2$  Hz, 2H), 7.50 (d,  $J = 1.6$  Hz, 1H), 7.41 (dd,  $J = 9.0, 2.0$  Hz, 1H), 7.30 (d,  $J = 2.0$  Hz, 1H), 7.25 (t,  $J = 4.8$  Hz, 1H), 4.04 (s, 3H), 3.98 (s, 3H);  $^{13}\text{C}$  NMR (100 MHz,  $\text{CDCl}_3$ )  $\delta$ : 167.0, 166.9, 158.7, 158.1,

145.9, 145.0, 140.5, 138.8, 138.3, 136.6, 130.2, 130.1, 129.9, 129.3, 129.0, 127.6, 127.5, 126.8, 125.9, 123.5, 121.6, 121.4, 116.9, 116.8, 114.3, 52.3, 52.2; IR (ATR): 2950, 2991, 2850, 1725, 1608, 1577, 1563, 1450, 1425, 1278, 1187, 1103, 846, 767; HRMS (EI) calcd for  $C_{32}H_{22}ClN_3O_4$ : 547.1299, 549.1269 ( $[M]^+$ ), found 547.1290, 549.1266 ( $[M]^+$ ).

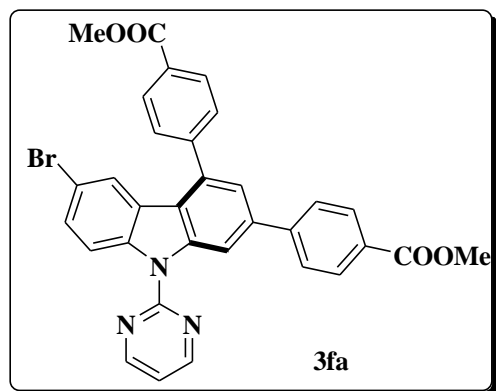

Yield 79%; Mp 231-232 °C;  $^1H$  NMR (400 MHz,  $CDCl_3$ )  $\delta$ : 9.17 (d,  $J = 1.6$  Hz, 1H), 8.89 (d,  $J = 4.8$  Hz, 2H), 8.71 (d,  $J = 9.0$  Hz, 1H), 8.26 (d,  $J = 8.2$  Hz, 2H), 8.15 (d,  $J = 8.4$  Hz, 2H), 7.82 (d,  $J = 8.4$  Hz, 2H), 7.71 (d,  $J = 8.2$  Hz, 2H), 7.52 (dd,  $J = 9.0, 2.0$  Hz, 1H), 7.47 (d,  $J = 1.6$  Hz, 1H), 7.44 (d,  $J = 2.0$  Hz, 1H), 7.22 (t,  $J = 4.8$  Hz, 1H), 4.02 (s, 3H), 3.96 (s, 3H);  $^{13}C$  NMR (100 MHz,  $CDCl_3$ )  $\delta$ : 167.0, 167.0, 158.7, 158.2, 145.8, 145.0, 140.4, 138.8, 138.7, 136.6, 130.2, 130.1, 129.9, 129.5, 129.3, 129.0, 127.6, 126.4, 124.4, 123.6, 121.4, 117.3, 116.9, 115.1, 114.2, 52.3, 52.2; IR (ATR): 2950, 1720, 1608, 1579, 1562, 1481, 1448, 1425, 1407, 1282, 1214, 1189, 1112, 1016, 846, 767; HRMS (EI) calcd for  $C_{32}H_{22}BrN_3O_4$ : 591.0794, 593.0773 ( $[M]^+$ ), found 591.0787, 593.0776 ( $[M]^+$ ).

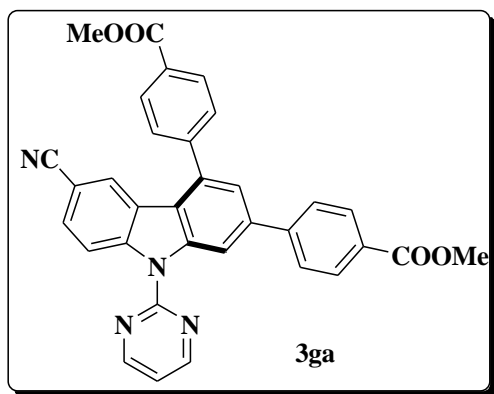

Yield 38%; Mp 279-280 °C;  $^1\text{H}$  NMR (400 MHz,  $\text{CDCl}_3$ )  $\delta$ : 9.13 (d,  $J = 1.4$  Hz, 1H), 8.96 (d,  $J = 4.8$  Hz, 2H), 8.88 (d,  $J = 8.8$  Hz, 1H), 8.28 (d,  $J = 8.2$  Hz, 2H), 8.16 (d,  $J = 8.4$  Hz, 2H), 7.82 (d,  $J = 8.4$  Hz, 2H), 7.75 – 7.66 (m, 3H), 7.62 (d,  $J = 1.2$  Hz, 1H), 7.53 (d,  $J = 1.4$  Hz, 1H), 7.32 (t,  $J = 4.8$  Hz, 1H), 4.04 (s, 3H), 3.97 (s, 3H);  $^{13}\text{C}$  NMR (100 MHz,  $\text{CDCl}_3$ )  $\delta$ : 166.9, 166.7, 158.4, 145.5, 144.5, 141.9, 140.6, 139.6, 136.9, 130.3, 130.3, 130.2, 129.9, 129.3, 129.1, 127.6, 126.1, 124.8, 124.1, 121.1, 119.8, 117.7, 116.4, 114.1, 105.2, 52.3, 52.2; IR (ATR): 2952, 2223, 1727, 1606, 1573, 1484, 1454, 1427, 1274, 1187, 1103, 846, 767; HRMS (EI) calcd for  $\text{C}_{33}\text{H}_{22}\text{N}_4\text{O}_4$ : 583.1641 ( $[\text{M}]^+$ ), found 583.1640 ( $[\text{M}]^+$ ).

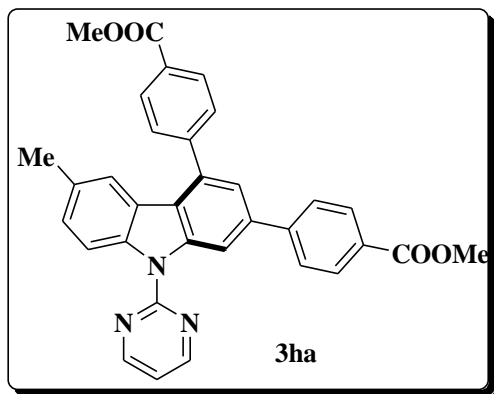

Yield 84%; Mp 164-165 °C;  $^1\text{H}$  NMR (400 MHz,  $\text{CDCl}_3$ )  $\delta$ : 9.21 (s, 1H), 8.91 (s, 2H), 8.72 (d,  $J = 8.0$  Hz, 1H), 8.27 (d,  $J = 7.2$  Hz, 2H), 8.16 (d,  $J = 7.2$  Hz, 2H), 7.85 (d,  $J = 7.2$  Hz, 2H), 7.76 (d,  $J = 7.2$  Hz, 2H), 7.47 (s, 1H), 7.30 – 7.08 (m, 3H), 4.04 (s, 3H), 3.98 (s, 3H), 2.32 (s, 3H);  $^{13}\text{C}$  NMR (100 MHz,  $\text{CDCl}_3$ )  $\delta$ : 167.1, 159.0, 158.0, 146.2, 145.8, 140.3, 138.2, 137.9, 136.3, 131.5, 130.1, 129.9, 129.6, 129.5, 128.8, 128.1, 127.5, 124.7, 123.2, 122.6, 121.9, 116.4, 115.5, 114.1, 52.3, 52.1, 21.5; IR (ATR):

3355, 3954, 2923, 2852, 1714, 1606, 1579, 1477, 1430, 1324, 1272, 1213, 1178, 1105, 857, 775; HRMS (EI) calcd for  $C_{33}H_{25}N_3O_4$ : 527.1845 ( $[M]^+$ ), found 527.1845 ( $[M]^+$ ).

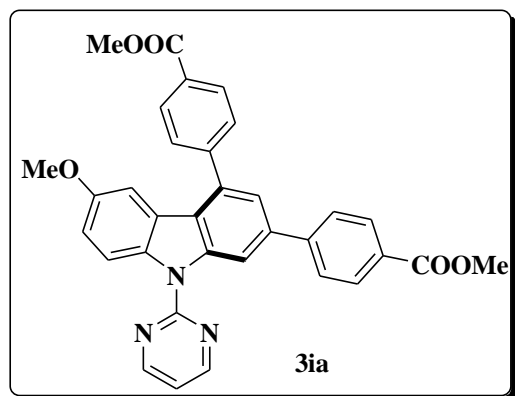

Yield 85%; Mp 164-165 °C;  $^1H$  NMR (400 MHz,  $CDCl_3$ )  $\delta$ : 9.23 (d,  $J = 1.6$  Hz, 1H), 8.88 (d,  $J = 4.8$  Hz, 2H), 8.77 (d,  $J = 9.2$  Hz, 1H), 8.24 (d,  $J = 8.4$  Hz, 2H), 8.15 (d,  $J = 8.4$  Hz, 2H), 7.84 (d,  $J = 8.4$  Hz, 2H), 7.74 (d,  $J = 8.4$  Hz, 2H), 7.46 (d,  $J = 1.6$  Hz, 1H), 7.17 (t,  $J = 4.8$  Hz, 1H), 7.06 (dd,  $J = 9.2, 2.6$  Hz, 1H), 6.77 (d,  $J = 2.6$  Hz, 1H), 4.00 (s, 3H), 3.96 (s, 3H), 3.60 (s, 3H);  $^{13}C$  NMR (100 MHz,  $CDCl_3$ )  $\delta$ : 167.1, 167.0, 159.0, 158.0, 155.0, 146.1, 145.5, 140.6, 138.1, 136.2, 134.7, 130.1, 129.8, 129.6, 128.8, 127.5, 125.4, 123.0, 122.6, 116.9, 116.2, 114.9, 114.5, 105.1, 55.4, 52.3, 52.2, 29.7; IR (ATR): 3363, 3193, 2921, 2852, 1720, 1658, 1606, 1581, 1481, 1432, 1274, 1214, 1105, 1043, 852, 794; HRMS (EI) calcd for  $C_{33}H_{25}N_3O_5$ : 543.1794 ( $[M]^+$ ), found 543.1797 ( $[M]^+$ ).

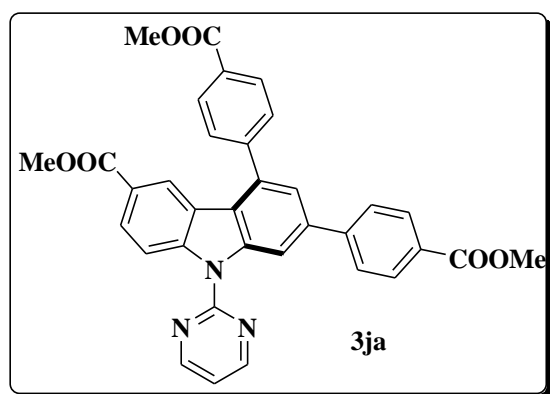

Yield 71%; Mp 246-247 °C;  $^1\text{H}$  NMR (400 MHz,  $\text{CDCl}_3$ )  $\delta$ : 9.10 (d,  $J = 1.4$  Hz, 1H), 8.91 (d,  $J = 4.8$  Hz, 2H), 8.77 (d,  $J = 8.8$  Hz, 1H), 8.27 (d,  $J = 8.2$  Hz, 2H), 8.18 – 8.04 (m, 4H), 7.81 (d,  $J = 8.4$  Hz, 2H), 7.74 (d,  $J = 8.2$  Hz, 2H), 7.51 (d,  $J = 1.4$  Hz, 1H), 7.27 – 7.20 (m, 1H), 4.01 (s, 3H), 3.95 (s, 3H), 3.82 (s, 3H);  $^{13}\text{C}$  NMR (100 MHz,  $\text{CDCl}_3$ )  $\delta$ : 167.1, 167.0, 166.9, 158.6, 158.2, 145.8, 145.0, 142.7, 140.7, 138.7, 136.7, 130.2, 130.1, 129.9, 129.4, 129.0, 128.1, 127.6, 124.3, 123.9, 123.8, 123.7, 122.2, 117.3, 115.2, 114.1, 52.3, 52.2, 52.0; IR (ATR): 2950, 1720, 1606, 1583, 1563, 1482, 1454, 1427, 1309, 1276, 1103, 850, 767; HRMS (EI) calcd for  $\text{C}_{34}\text{H}_{25}\text{N}_3\text{O}_6$ : 571.1743 ( $[\text{M}]^+$ ), found 571.1740 ( $[\text{M}]^+$ ).

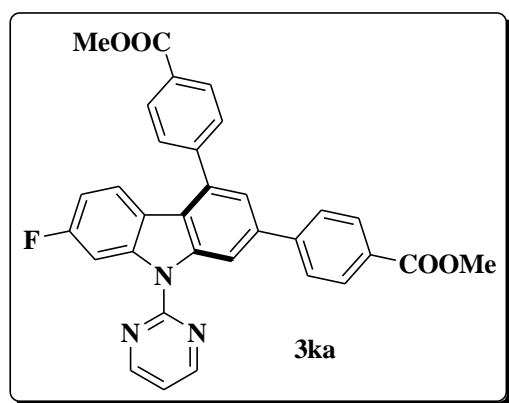

Yield 89%; Mp 197-198 °C;  $^1\text{H}$  NMR (400 MHz,  $\text{CDCl}_3$ )  $\delta$ : 9.18 (d,  $J = 1.2$  Hz, 1H), 8.90 (d,  $J = 4.8$  Hz, 2H), 8.60 (dd,  $J = 11.2, 2.2$  Hz, 1H), 8.25 (d,  $J = 8.0$  Hz, 2H), 8.15 (d,  $J = 8.2$  Hz, 2H), 7.82 (d,  $J = 8.2$  Hz, 2H), 7.71 (d,  $J = 8.0$  Hz, 2H), 7.47 (d,  $J = 1.2$  Hz, 1H), 7.23 – 7.19 (m, 2H), 6.83 (td,  $J = 8.8, 2.2$  Hz, 1H), 4.03 (s, 3H), 3.97 (s, 3H);  $^{13}\text{C}$  NMR (100 MHz,  $\text{CDCl}_3$ )  $\delta$ : 167.0, 167.0, 162.1 (d,  $J = 242.5$  Hz), 158.8, 158.1, 145.9, 145.4, 140.7 (d,  $J = 13.0$  Hz), 140.5 (d,  $J = 1.8$  Hz), 137.8, 135.8, 130.1, 130.0, 129.7, 129.4, 128.9, 127.5, 123.4, 122.6 (d,  $J = 9.9$  Hz), 122.2, 120.9, 116.8, 114.3, 110.0 (d,  $J = 23.8$  Hz), 103.4 (d,  $J = 29.4$  Hz), 52.3, 52.2; IR (ATR): 3396, 2918, 2805, 1718, 1644, 1604, 1577, 1563, 1430, 1280, 1186, 1101, 850, 808, 769; HRMS (EI) calcd for  $\text{C}_{32}\text{H}_{22}\text{FN}_3\text{O}_4$ : 531.1594 ( $[\text{M}]^+$ ), found 531.1589 ( $[\text{M}]^+$ ).

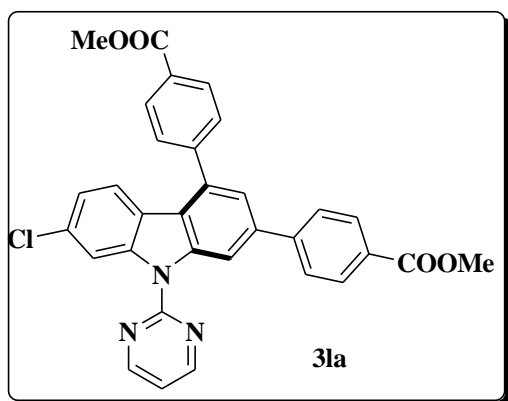

Yield 73%; Mp 192-193 °C;  $^1\text{H}$  NMR (400 MHz,  $\text{CDCl}_3$ )  $\delta$ : 9.13 (d,  $J = 1.6$  Hz, 1H), 8.88 (d,  $J = 4.8$  Hz, 2H), 8.85 (d,  $J = 1.6$  Hz, 1H), 8.20 (d,  $J = 8.4$  Hz, 2H), 8.11 (d,  $J = 8.4$  Hz, 2H), 7.78 (d,  $J = 8.4$  Hz, 2H), 7.66 (d,  $J = 8.4$  Hz, 2H), 7.44 (d,  $J = 1.6$  Hz, 1H), 7.20 (t,  $J = 4.8$  Hz, 1H), 7.15 (d,  $J = 8.4$  Hz, 1H), 7.02 (dd,  $J = 8.4, 2.0$  Hz, 1H), 3.98 (s, 3H), 3.93 (s, 3H);  $^{13}\text{C}$  NMR (100 MHz,  $\text{CDCl}_3$ )  $\delta$ : 167.0, 167.0, 158.7, 158.2, 145.9, 145.2, 140.5, 140.3, 138.4, 136.2, 132.6, 130.1, 130.0, 129.8, 129.4, 129.0, 127.5, 123.5, 123.1, 122.6, 122.5, 122.0, 116.9, 116.0, 114.3, 52.3, 52.2; IR (ATR): 3357, 2923, 2852, 1720, 1658, 1631, 1604, 1577, 1428, 1280, 1186, 1108, 962, 769; HRMS (EI) calcd for  $\text{C}_{32}\text{H}_{22}\text{ClN}_3\text{O}_4$ : 547.1299, 549.1269 ( $[\text{M}]^+$ ), found 547.1303, 549.1298 ( $[\text{M}]^+$ ).

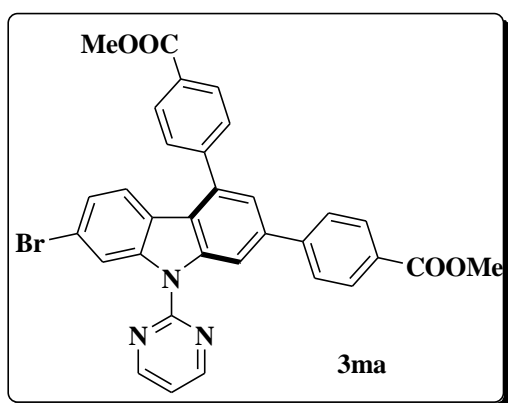

Yield 77%; Mp 199-200 °C;  $^1\text{H}$  NMR (400 MHz,  $\text{CDCl}_3$ )  $\delta$ : 9.11 (s, 1H), 8.99 (s, 1H), 8.86 (d,  $J = 4.0$  Hz, 2H), 8.19 (d,  $J = 7.6$  Hz, 2H), 8.10 (d,  $J = 7.6$  Hz, 2H), 7.77 (d,  $J = 7.6$  Hz, 2H), 7.64 (d,  $J = 7.6$  Hz, 2H), 7.42 (s, 1H), 7.23 – 7.02 (m, 3H), 3.98 (s, 3H), 3.93 (s, 3H);  $^{13}\text{C}$  NMR (100 MHz,  $\text{CDCl}_3$ )  $\delta$ : 167.0, 167.0, 158.6, 158.1, 145.8, 145.2, 140.6, 140.1, 138.5, 136.3, 130.1, 130.0, 129.8, 129.4, 129.0, 127.5, 125.3, 123.5,



122.7, 122.0, 120.6, 118.9, 116.9, 114.3, 52.3, 52.2; IR (ATR): 3359, 3191, 2921, 2850, 1722, 1606, 1577, 1421, 1276, 1106, 815, 771; HRMS (EI) calcd for  $C_{32}H_{22}BrN_3O_4$ : 591.0794, 593.0773 ( $[M]^+$ ), found 591.0794, 593.0780 ( $[M]^+$ ).

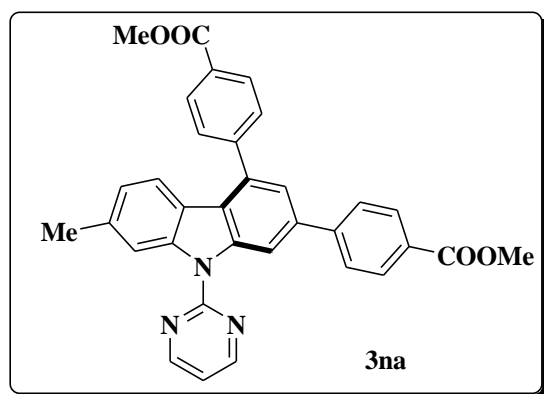

Yield 86%; Mp 153-154 °C;  $^1H$  NMR (400 MHz,  $CDCl_3$ )  $\delta$ : 9.13 (s, 1H), 8.94 (d,  $J$  = 4.8 Hz, 2H), 8.61 (s, 1H), 8.25 (d,  $J$  = 8.0 Hz, 2H), 8.16 (d,  $J$  = 8.2 Hz, 2H), 7.85 (d,  $J$  = 8.2 Hz, 2H), 7.75 (d,  $J$  = 8.0 Hz, 2H), 7.48 (s, 1H), 7.42 – 7.30 (m, 2H), 6.94 (d,  $J$  = 8.0 Hz, 1H), 4.03 (s, 3H), 3.98 (s, 3H), 2.54 (s, 3H);  $^{13}C$  NMR (100 MHz,  $CDCl_3$ )  $\delta$ : 167.1, 158.9, 158.1, 146.2, 145.7, 140.4, 140.1, 137.6, 137.2, 135.9, 130.3, 130.1, 129.9, 129.6, 129.5, 128.8, 127.5, 123.5, 123.1, 122.8, 122.2, 121.6, 116.6, 115.6, 113.9, 52.3, 52.1, 22.3; IR (ATR): 2923, 2852, 1720, 1606, 1577, 1563, 1432, 1276, 1187, 1110, 769; HRMS (EI) calcd for  $C_{33}H_{25}N_3O_4$ : 527.1845 ( $[M]^+$ ), found 527.1837 ( $[M]^+$ ).

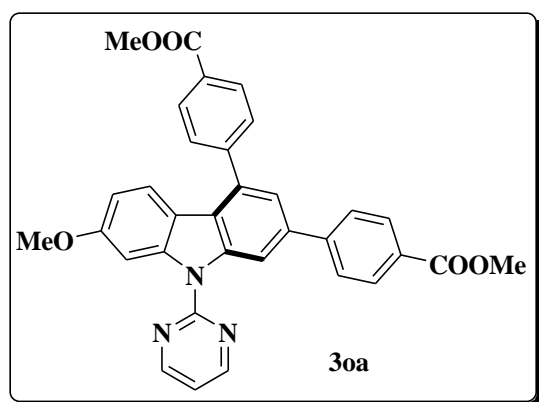

Yield 81%; Mp 183- 184 °C;  $^1H$  NMR (400 MHz,  $CDCl_3$ )  $\delta$ : 9.15 (d,  $J$  = 1.6 Hz, 1H), 8.93 (d,  $J$  = 4.8 Hz, 2H), 8.44 (d,  $J$  = 2.4 Hz, 1H), 8.25 (d,  $J$  = 8.4 Hz, 2H), 8.16 (d,  $J$

= 8.4 Hz, 2H), 7.85 (d,  $J = 8.4$  Hz, 2H), 7.75 (d,  $J = 8.4$  Hz, 2H), 7.48 (d,  $J = 1.6$  Hz, 1H), 7.25 – 7.20 (m, 2H), 6.73 (dd,  $J = 8.8, 2.4$  Hz, 1H), 4.03 (s, 3H), 3.98 (s, 3H), 3.93 (s, 3H);  $^{13}\text{C}$  NMR (125 MHz,  $\text{CDCl}_3$ )  $\delta$ : 167.1, 167.1, 159.4, 159.0, 158.1, 146.2, 145.7, 141.5, 140.2, 136.9, 135.3, 130.1, 129.9, 129.5, 129.5, 128.7, 127.5, 123.2, 122.9, 122.5, 118.3, 116.6, 114.0, 110.0, 100.7, 55.7, 52.3, 52.2; IR (ATR): 2950, 2852, 1720, 1606, 1577, 1432, 1272, 1193, 1114, 852, 767; HRMS (EI) calcd for  $\text{C}_{33}\text{H}_{25}\text{N}_3\text{O}_5$ : 543.1794 ( $[\text{M}]^+$ ), found 543.1788 ( $[\text{M}]^+$ ).

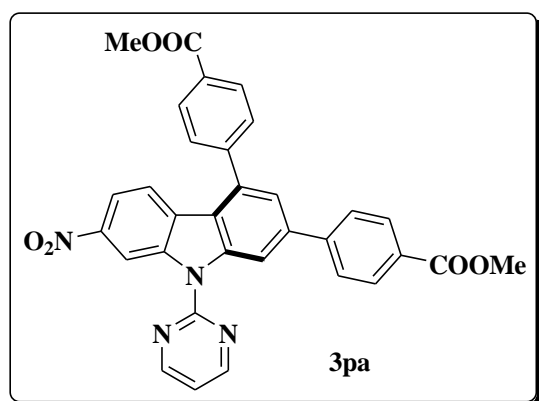

Yield 69%; Mp 272-273 °C;  $^1\text{H}$  NMR (400 MHz,  $\text{CDCl}_3$ )  $\delta$ : 9.77 (d,  $J = 1.6$  Hz, 1H), 9.25 (s, 1H), 8.99 (d,  $J = 4.8$  Hz, 2H), 8.28 (d,  $J = 8.0$  Hz, 2H), 8.19 (d,  $J = 8.0$  Hz, 2H), 7.98 (dd,  $J = 8.8, 1.6$  Hz, 1H), 7.85 (d,  $J = 8.0$  Hz, 2H), 7.72 (d,  $J = 8.0$  Hz, 2H), 7.56 (s, 1H), 7.42 – 7.30 (m, 2H), 4.05 (s, 3H), 3.99 (s, 3H);  $^{13}\text{C}$  NMR (100 MHz,  $\text{CDCl}_3$ )  $\delta$ : 166.9, 166.8, 158.5, 158.4, 146.3, 145.4, 144.6, 142.0, 140.3, 139.1, 137.5, 130.2, 130.2, 129.6, 129.4, 129.3, 127.6, 123.9, 121.6, 121.0, 117.5, 117.3, 114.5, 112.2, 52.4, 52.2; IR (ATR): 2919, 1720, 1608, 1577, 1515, 1486, 1427, 1340, 1276, 1112, 854, 769; HRMS (EI) calcd for  $\text{C}_{32}\text{H}_{22}\text{N}_4\text{O}_6$ : 558.1539 ( $[\text{M}]^+$ ), found 558.1535 ( $[\text{M}]^+$ ).

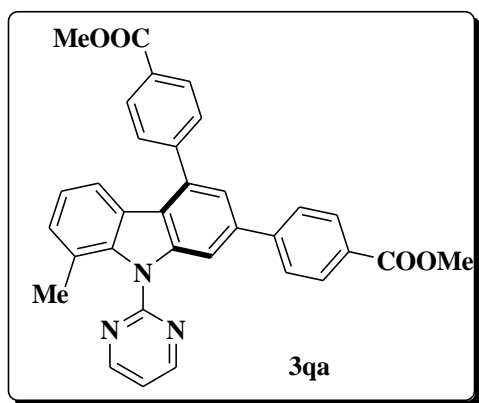

Yield 62%; Mp 170-171 °C;  $^1\text{H}$  NMR (400 MHz,  $\text{CDCl}_3$ )  $\delta$ : 8.98 (d,  $J = 4.8$  Hz, 2H), 8.31 (s, 1H), 8.26 (d,  $J = 8.0$  Hz, 2H), 8.13 (d,  $J = 8.0$  Hz, 2H), 7.79 – 7.75 (m, 4H), 7.46 (s, 1H), 7.36 (t,  $J = 4.8$  Hz, 1H), 7.28 – 7.24 (d,  $J = 18.1$  Hz, 2H), 7.04 (t,  $J = 7.6$  Hz, 1H), 4.03 (s, 3H), 3.97 (s, 3H), 2.18 (s, 3H);  $^{13}\text{C}$  NMR (100 MHz,  $\text{CDCl}_3$ )  $\delta$ : 167.1, 167.0, 158.8, 158.7, 145.9, 145.6, 142.3, 140.1, 138.1, 136.7, 130.1, 129.9, 129.6, 129.6, 129.5, 128.8, 127.4, 125.1, 123.6, 122.9, 122.5, 122.0, 120.0, 118.5, 110.2, 100.0, 52.3, 52.1, 21.1; IR (ATR): 3359, 2921, 2852, 1720, 1660, 1631, 1563, 1457, 1425, 1282, 1110, 775; HRMS (EI) calcd for  $\text{C}_{33}\text{H}_{25}\text{N}_3\text{O}_4$ : 527.1845 ( $[\text{M}]^+$ ), found 527.1853 ( $[\text{M}]^+$ ).

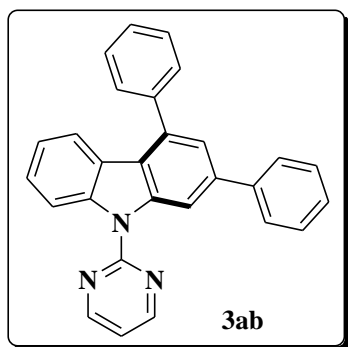

Yield 75%; Mp 166-167 °C;  $^1\text{H}$  NMR (400 MHz,  $\text{CDCl}_3$ )  $\delta$ : 9.14 (d,  $J = 1.6$  Hz, 1H), 8.91 (d,  $J = 4.8$  Hz, 2H), 8.82 (d,  $J = 8.4$  Hz, 1H), 7.83 – 7.78 (m, 2H), 7.68 (dd,  $J = 8.0, 1.6$  Hz, 2H), 7.62 – 7.35 (m, 9H), 7.19 (t,  $J = 4.8$  Hz, 1H), 7.14 – 7.08 (m, 1H);  $^{13}\text{C}$  NMR (100 MHz,  $\text{CDCl}_3$ )  $\delta$ : 159.1, 158.0, 141.9, 141.1, 140.1, 139.9, 139.4, 137.3, 129.4, 128.8, 128.6, 127.7, 127.2, 126.3, 125.2, 123.6, 122.3, 122.0, 121.9, 116.4, 115.4, 113.3; IR (ATR): 2956, 2921, 2852, 1660, 1581, 1562, 1450, 1425, 1332, 800, 750; HRMS (EI) calcd for  $\text{C}_{28}\text{H}_{19}\text{N}_3$ : 397.1579 ( $[\text{M}]^+$ ), found 397.1569 ( $[\text{M}]^+$ ).

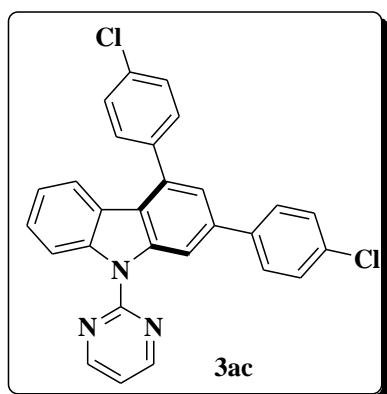

Yield 62%; Mp 186-187 °C;  $^1\text{H}$  NMR (400 MHz,  $\text{CDCl}_3$ )  $\delta$ : 9.07 (d,  $J = 1.6$  Hz, 1H), 8.91 (d,  $J = 4.8$  Hz, 2H), 8.80 (d,  $J = 8.4$  Hz, 1H), 7.72 – 7.66 (m, 2H), 7.60 – 7.52 (m, 4H), 7.49 – 7.43 (m, 3H), 7.38 (d,  $J = 1.6$  Hz, 1H), 7.35 (d,  $J = 7.6$  Hz, 1H), 7.21 (t,  $J = 4.8$  Hz, 1H), 7.16 – 7.10 (m, 1H);  $^{13}\text{C}$  NMR (100 MHz,  $\text{CDCl}_3$ )  $\delta$ : 159.0, 158.1, 140.2, 140.1, 139.9, 139.4, 138.1, 136.1, 133.9, 133.4, 130.7, 128.9, 128.9, 128.8, 126.6, 124.7, 123.2, 122.4, 122.1, 121.8, 116.6, 115.6, 113.4; IR (ATR): 2923, 1579, 1563, 1496, 1452, 1421, 1332, 1089, 835, 752; HRMS (EI) calcd for  $\text{C}_{28}\text{H}_{17}\text{Cl}_2\text{N}_3$ : 465.0800, 467.0770, 469.0741 ( $[\text{M}]^+$ ), found 465.0810, 467.0782, 469.0751 ( $[\text{M}]^+$ ).

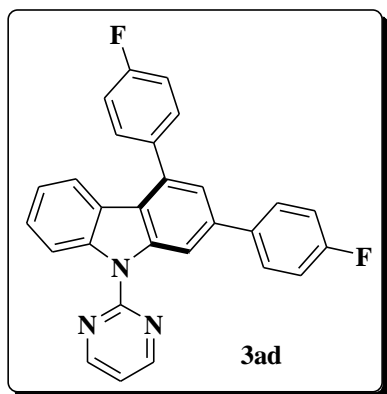

Yield 82%; Mp 162-163 °C;  $^1\text{H}$  NMR (400 MHz,  $\text{CDCl}_3$ )  $\delta$ : 9.05 (d,  $J = 1.6$  Hz, 1H), 8.91 (d,  $J = 4.8$  Hz, 2H), 8.80 (d,  $J = 8.4$  Hz, 1H), 7.78 – 7.70 (m, 2H), 7.63 – 7.58 (m, 2H), 7.48 – 7.42 (m, 1H), 7.39 (d,  $J = 1.6$  Hz, 1H), 7.32 (d,  $J = 7.6$  Hz, 1H), 7.29 – 7.23 (m, 3H), 7.21 – 7.10 (m, 4H);  $^{13}\text{C}$  NMR (100 MHz,  $\text{CDCl}_3$ )  $\delta$ : 162.6 (d,  $J = 246.3$  Hz), 162.5 (d,  $J = 246.1$  Hz), 159.0, 158.1, 140.1, 139.9, 138.4, 137.9 (d,  $J = 3.2$  Hz), 136.9 (d,  $J = 3.5$  Hz), 136.3, 131.0 (d,  $J = 8.0$  Hz), 129.2 (d,  $J = 8.0$  Hz),

126.5, 124.9, 123.4, 122.3, 122.0, 121.7, 116.5, 115.7 (d,  $J = 7.7$  Hz), 115.5, 115.5 (d,  $J = 7.7$  Hz), 113.3; IR (ATR): 3367, 2921, 2852, 1600, 1579, 1511, 1452, 1423, 1330, 1220, 1159, 833, 750; HRMS (EI) calcd for  $C_{28}H_{17}F_2N_3$ : 433.1391 ( $[M]^+$ ), found 433.1388 ( $[M]^+$ ).

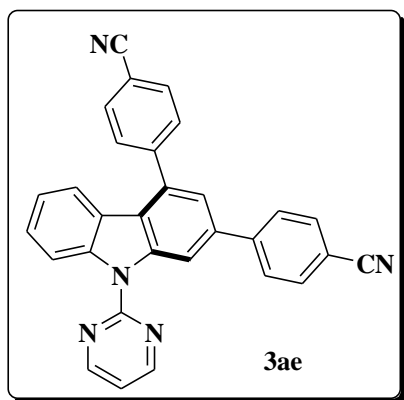

Yield 58%; Mp 218-219 °C;  $^1H$  NMR (400 MHz,  $CDCl_3$ )  $\delta$ : 9.19 (s, 1H), 8.94 (d,  $J = 4.0$  Hz, 2H), 8.85 (d,  $J = 8.2$  Hz, 1H), 7.97 – 7.72 (m, 8H), 7.51 (t,  $J = 7.2$  Hz, 1H), 7.41 (s, 1H), 7.26 (m, 2H), 7.16 (t,  $J = 7.2$  Hz, 1H);  $^{13}C$  NMR (100 MHz,  $CDCl_3$ )  $\delta$ : 158.8, 158.2, 145.9, 145.5, 140.2, 140.1, 137.3, 135.5, 132.7, 132.5, 130.2, 128.2, 127.3, 124.1, 122.9, 122.3, 121.7, 119.0, 118.8, 116.9, 115.9, 114.4, 111.9, 111.0; IR (ATR): 3359, 2921, 2852, 2223, 1741, 1658, 1633, 1602, 1577, 1562, 1452, 1425, 1403, 1334, 835, 756; HRMS (EI) calcd for  $C_{30}H_{17}N_5$ : 447.1484 ( $[M]^+$ ), found 447.1489 ( $[M]^+$ ).

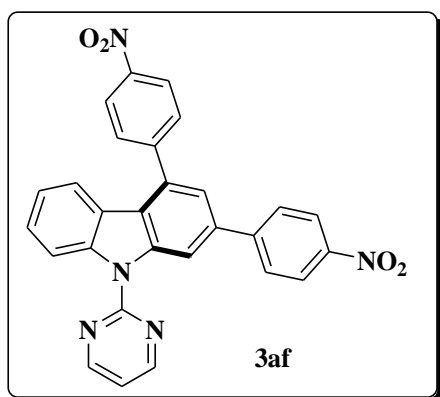

Yield 88%; Mp 187-188 °C;  $^1H$  NMR (400 MHz,  $CDCl_3$ )  $\delta$ : 9.25 (s, 1H), 8.96 (d,  $J = 4.8$  Hz, 2H), 8.86 (d,  $J = 8.4$  Hz, 1H), 8.47 (d,  $J = 8.4$  Hz, 2H), 8.37 (d,  $J = 8.6$  Hz,

2H), 7.93 (d,  $J = 8.6$  Hz, 2H), 7.86 (d,  $J = 8.4$  Hz, 2H), 7.53 (t,  $J = 7.6$  Hz, 1H), 7.48 (s, 1H), 7.31 – 7.27 (m, 2H), 7.16 (t,  $J = 7.6$  Hz, 1H);  $^{13}\text{C}$  NMR (100 MHz,  $\text{CDCl}_3$ )  $\delta$ : 158.8, 158.2, 147.9, 147.8, 147.4, 147.1, 140.2, 140.1, 136.9, 135.2, 130.4, 128.3, 127.4, 124.2, 124.0, 124.0, 123.1, 123.0, 122.4, 121.7, 117.0, 116.0, 114.8; IR (ATR): 1594, 1579, 1562, 1513, 1454, 1430, 1342, 1106, 844, 752; HRMS (EI) calcd for  $\text{C}_{28}\text{H}_{17}\text{N}_5\text{O}_4$ : 487.1281 ( $[\text{M}]^+$ ), found 487.1285 ( $[\text{M}]^+$ ).

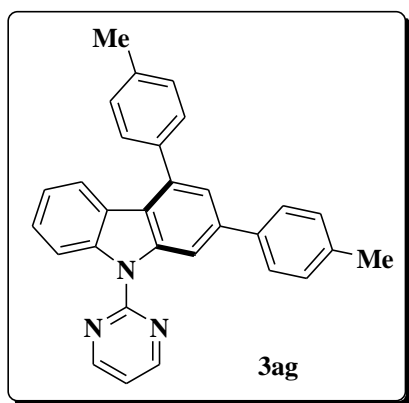

Yield 81%; Mp 122-123 °C;  $^1\text{H}$  NMR (400 MHz,  $\text{CDCl}_3$ )  $\delta$ : 9.09 (d,  $J = 1.6$  Hz, 1H), 8.91 (d,  $J = 4.8$  Hz, 2H), 8.80 (d,  $J = 8.2$  Hz, 1H), 7.69 (d,  $J = 8.2$  Hz, 2H), 7.56 (d,  $J = 8.0$  Hz, 2H), 7.48 (d,  $J = 1.6$  Hz, 1H), 7.46 – 7.35 (m, 4H), 7.31 (d,  $J = 8.0$  Hz, 2H), 7.19 (t,  $J = 4.8$  Hz, 1H), 7.11 (t,  $J = 7.6$  Hz, 1H), 2.54 (s, 3H), 2.45 (s, 3H);  $^{13}\text{C}$  NMR (100 MHz,  $\text{CDCl}_3$ )  $\delta$ : 159.1, 158.0, 140.1, 139.8, 139.3, 139.1, 138.2, 137.4, 137.3, 136.9, 129.5, 129.2, 127.5, 126.1, 125.3, 123.6, 122.1, 122.0, 121.8, 116.3, 115.4, 112.9, 21.4, 21.2; IR (ATR): 2958, 2919, 2850, 1727, 1662, 1581, 1562, 1454, 1432, 1334, 1261, 1020, 821, 800, 752; HRMS (EI) calcd for  $\text{C}_{30}\text{H}_{23}\text{N}_3$ : 425.1892 ( $[\text{M}]^+$ ), found 425.1890 ( $[\text{M}]^+$ ).

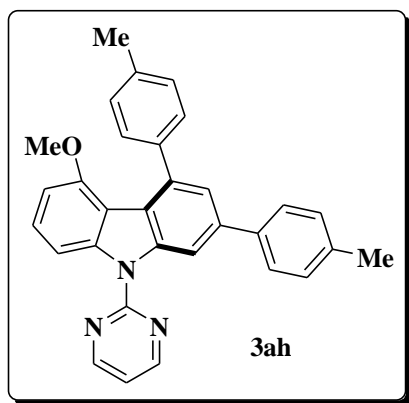

Yield 63%; Mp 197-198 °C;  $^1\text{H}$  NMR (400 MHz,  $\text{CDCl}_3$ )  $\delta$ : 8.92 – 8.90 (m, 3H), 8.27 (d,  $J = 8.2$  Hz, 1H), 7.66 (d,  $J = 8.0$  Hz, 2H), 7.50 (d,  $J = 1.6$  Hz, 1H), 7.42 – 7.34 (m, 3H), 7.28 – 7.19 (m, 5H), 6.62 (d,  $J = 7.9$  Hz, 1H), 3.24 (s, 3H), 2.48 (s, 3H), 2.42 (s, 3H);  $^{13}\text{C}$  NMR (100 MHz,  $\text{CDCl}_3$ )  $\delta$ : 158.9, 158.2, 154.7, 142.6, 141.5, 140.0, 138.9, 138.2, 137.9, 136.8, 135.4, 129.4, 129.0, 127.4, 127.4, 127.1, 124.8, 121.8, 116.8, 114.3, 111.3, 107.0, 103.5, 54.8, 21.3, 21.1; IR (ATR): 2921, 1575, 1560, 1513, 1427, 1413, 1338, 1297, 1278, 1110, 813; HRMS (EI) calcd for  $\text{C}_{31}\text{H}_{25}\text{N}_3\text{O}$ : 455.1998 ( $[\text{M}]^+$ ), found 455.1992 ( $[\text{M}]^+$ ).

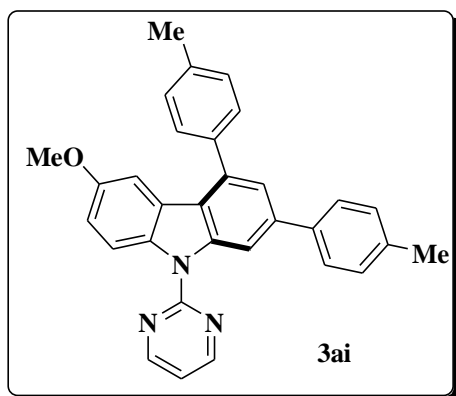

Yield 78%; Mp 158-159 °C;  $^1\text{H}$  NMR (400 MHz,  $\text{CDCl}_3$ )  $\delta$ : 9.14 (d,  $J = 1.2$  Hz, 1H), 8.85 (d,  $J = 4.8$  Hz, 2H), 8.75 (d,  $J = 9.0$  Hz, 1H), 7.69 (d,  $J = 8.0$  Hz, 2H), 7.55 (d,  $J = 7.8$  Hz, 2H), 7.46 (d,  $J = 1.2$  Hz, 1H), 7.37 (d,  $J = 7.8$  Hz, 2H), 7.30 (d,  $J = 8.0$  Hz, 2H), 7.12 (t,  $J = 4.8$  Hz, 1H), 7.03 (dd,  $J = 9.0, 2.6$  Hz, 1H), 6.85 (d,  $J = 2.6$  Hz, 1H), 3.64 (s, 3H), 2.51 (s, 3H), 2.43 (s, 3H);  $^{13}\text{C}$  NMR (100 MHz,  $\text{CDCl}_3$ )  $\delta$ : 159.1, 157.9, 154.9, 140.6, 139.6, 139.1, 138.0, 137.4, 137.2, 136.9, 134.5, 129.5, 129.4, 129.1, 127.5, 126.2, 123.2, 122.1, 116.6, 115.9, 114.1, 113.4, 105.3, 55.3, 21.4, 21.2; IR

(ATR): 2921, 1579, 1558, 1475, 1450, 1427, 1330, 1290, 1218, 1045, 802; HRMS (EI) calcd for C<sub>31</sub>H<sub>25</sub>N<sub>3</sub>O: 455.1998 ([M]<sup>+</sup>), found 455.1998 ([M]<sup>+</sup>).

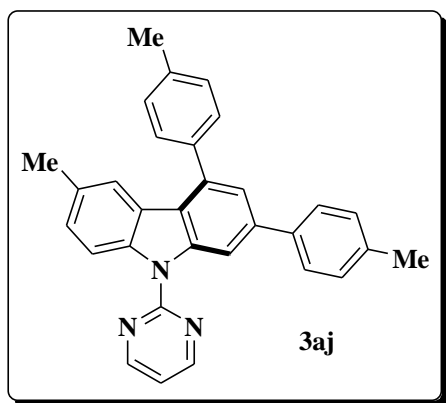

Yield 71%; Mp 158-159 °C; <sup>1</sup>H NMR (400 MHz, CDCl<sub>3</sub>) δ: 9.11 (d, *J* = 1.6 Hz, 1H), 8.88 (d, *J* = 4.8 Hz, 2H), 8.70 (d, *J* = 8.4 Hz, 1H), 7.70 (d, *J* = 8.0 Hz, 2H), 7.57 (d, *J* = 8.0 Hz, 2H), 7.46 (d, *J* = 1.6 Hz, 1H), 7.39 (d, *J* = 7.8 Hz, 2H), 7.31 (d, *J* = 8.0 Hz, 2H), 7.27 – 7.23 (m, 2H), 7.15 (t, *J* = 4.8 Hz, 1H), 2.55 (s, 3H), 2.45 (s, 3H), 2.34 (s, 3H); <sup>13</sup>C NMR (100 MHz, CDCl<sub>3</sub>) δ: 159.2, 157.9, 140.3, 139.1, 138.3, 138.0, 137.3, 137.3, 136.8, 131.1, 129.4, 129.2, 129.1, 127.5, 127.4, 125.5, 123.5, 122.1, 122.1, 116.1, 115.2, 113.0, 21.5, 21.4, 21.2; IR (ATR): 2919, 2852, 1579, 1564, 1489, 1423, 1326, 1270, 1148, 1045, 809; HRMS (EI) calcd for C<sub>31</sub>H<sub>25</sub>N<sub>3</sub>: 439.2048 ([M]<sup>+</sup>), found 439.2044 ([M]<sup>+</sup>).

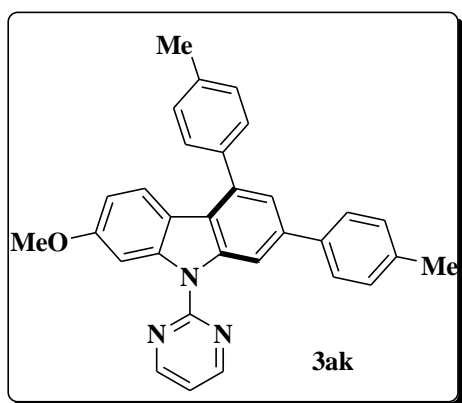

Yield 65%; Mp 115-116 °C; <sup>1</sup>H NMR (400 MHz, CDCl<sub>3</sub>) δ: 9.04 (d, *J* = 1.2 Hz, 1H), 8.88 (d, *J* = 4.8 Hz, 2H), 8.43 (d, *J* = 2.0 Hz, 1H), 7.67 (d, *J* = 8.0 Hz, 2H), 7.54 (d, *J* = 7.8 Hz, 2H), 7.44 (d, *J* = 1.2 Hz, 1H), 7.37 (d, *J* = 7.8 Hz, 2H), 7.32 – 7.27 (m, 3H),



7.16 (t,  $J = 4.8$  Hz, 1H), 6.73 (dd,  $J = 8.8, 2.0$  Hz, 1H), 3.92 (s, 3H), 2.52 (s, 3H), 2.43 (s, 3H);  $^{13}\text{C}$  NMR (100 MHz,  $\text{CDCl}_3$ )  $\delta$ : 159.2, 158.9, 158.0, 141.2, 140.2, 139.2, 138.3, 138.2, 137.3, 136.7, 136.3, 129.4, 129.2, 129.2, 127.5, 123.5, 122.4, 122.3, 119.1, 116.3, 113.0, 109.5, 100.7, 55.7, 21.4, 21.1; IR (ATR): 2921, 2852, 1619, 1598, 1579, 1562, 1515, 1467, 1427, 1340, 1276, 1193, 1160, 1141, 1043, 811; HRMS (EI) calcd for  $\text{C}_{31}\text{H}_{25}\text{N}_3\text{O}$ : 455.1998 ( $[\text{M}]^+$ ), found 455.2003 ( $[\text{M}]^+$ ).

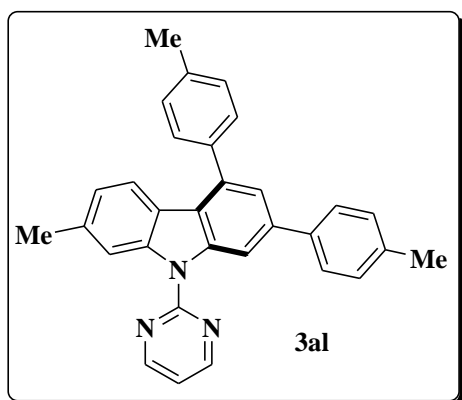

Yield 61%; Mp 109-110 °C;  $^1\text{H}$  NMR (400 MHz,  $\text{CDCl}_3$ )  $\delta$ : 9.02 (s, 1H), 8.90 (d,  $J = 4.8$  Hz, 2H), 8.58 (s, 1H), 7.68 (d,  $J = 8.0$  Hz, 2H), 7.55 (d,  $J = 7.8$  Hz, 2H), 7.45 (s, 1H), 7.37 (d,  $J = 7.6$  Hz, 2H), 7.30 (d,  $J = 7.8$  Hz, 3H), 7.17 (t,  $J = 4.8$  Hz, 1H), 6.93 (d,  $J = 8.0$  Hz, 1H), 2.53 (m, 6H), 2.43 (s, 3H);  $^{13}\text{C}$  NMR (100 MHz,  $\text{CDCl}_3$ )  $\delta$ : 159.1, 158.0, 140.2, 140.1, 139.2, 138.8, 138.3, 137.3, 136.9, 136.8, 136.3, 129.4, 129.2, 129.2, 127.5, 123.5, 123.2, 122.9, 122.2, 121.6, 116.3, 115.4, 112.8, 22.3, 21.4, 21.2; IR (ATR): 3359, 2919, 2850, 1658, 1631, 1575, 1562, 1513, 1423, 1324, 1265, 1141, 812; HRMS (EI) calcd for  $\text{C}_{31}\text{H}_{25}\text{N}_3$ : 439.2048 ( $[\text{M}]^+$ ), found 439.2040 ( $[\text{M}]^+$ ).

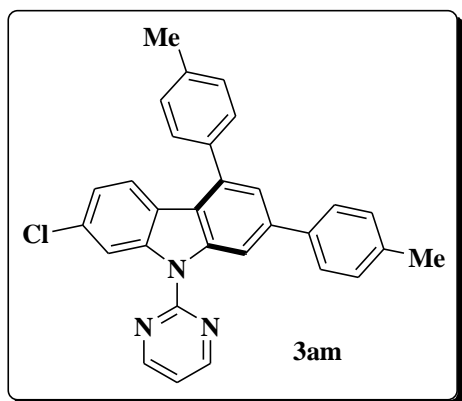

Yield 75%; Mp 143-144 °C;  $^1\text{H}$  NMR (400 MHz,  $\text{CDCl}_3$ )  $\delta$ : 9.08 (d,  $J = 1.2$  Hz, 1H), 8.88 (d,  $J = 4.8$  Hz, 3H), 7.68 (d,  $J = 8.0$  Hz, 2H), 7.52 (d,  $J = 7.8$  Hz, 2H), 7.47 (d,  $J = 1.2$  Hz, 1H), 7.37 (d,  $J = 7.8$  Hz, 2H), 7.31 (d,  $J = 8.0$  Hz, 3H), 7.17 (t,  $J = 4.8$  Hz, 1H), 7.08 (dd,  $J = 8.4, 1.8$  Hz, 1H), 2.53 (s, 3H), 2.44 (s, 3H);  $^{13}\text{C}$  NMR (100 MHz,  $\text{CDCl}_3$ )  $\delta$ : 158.8, 158.1, 140.4, 140.3, 139.7, 138.9, 137.8, 137.6, 137.2, 137.1, 131.8, 129.5, 129.4, 129.1, 127.5, 123.9, 123.8, 122.5, 122.3, 121.5, 116.6, 115.8, 113.2, 21.4, 21.2; IR (ATR): 2917, 1646, 1595, 1579, 1560, 1515, 1484, 1432, 1390, 1326, 962, 808; HRMS (EI) calcd for  $\text{C}_{30}\text{H}_{22}\text{ClN}_3$ : 459.1502, 461.1473  $[\text{M}]^+$ , found 459.1494, 461.1497 ( $[\text{M}]^+$ ).

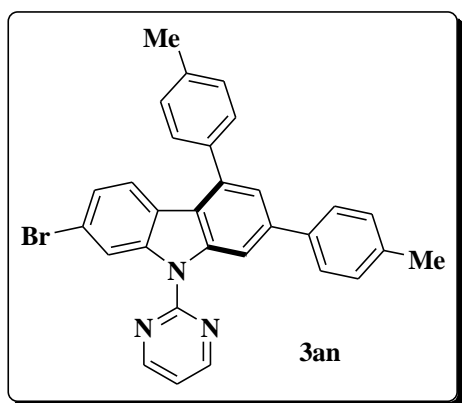

Yield 80%; Mp 128-129 °C;  $^1\text{H}$  NMR (400 MHz,  $\text{CDCl}_3$ )  $\delta$ : 9.07 (d,  $J = 1.2$  Hz, 1H), 9.03 (d,  $J = 1.2$  Hz, 1H), 8.89 (d,  $J = 4.8$  Hz, 2H), 7.67 (d,  $J = 8.0$  Hz, 2H), 7.51 (d,  $J = 8.0$  Hz, 2H), 7.46 (d,  $J = 1.2$  Hz, 1H), 7.37 (d,  $J = 7.8$  Hz, 2H), 7.30 (d,  $J = 8.0$  Hz, 2H), 7.26 – 7.18 (m, 3H), 2.52 (s, 3H), 2.43 (s, 3H);  $^{13}\text{C}$  NMR (100 MHz,  $\text{CDCl}_3$ )  $\delta$ : 158.8, 158.1, 140.5, 140.2, 139.8, 138.9, 137.8, 137.6, 137.3, 137.1, 129.5, 129.3, 129.1, 127.5, 125.0, 124.3, 123.8, 122.9, 121.5, 119.9, 118.6, 116.7, 113.2, 21.4, 21.2; IR (ATR): 3359, 2921, 2852, 1660, 1633, 1577, 1560, 1515, 1482, 1430, 1326, 1139, 954, 809; HRMS (EI) calcd for  $\text{C}_{30}\text{H}_{22}\text{BrN}_3$ : 503.0997, 505.0977  $[\text{M}]^+$ , found 503.0998, 505.0969 ( $[\text{M}]^+$ ).

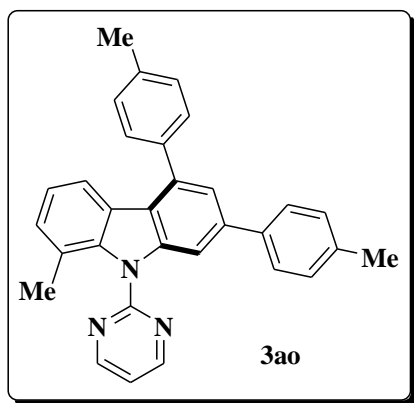

Yield 55%; Mp 170-171 °C;  $^1\text{H}$  NMR (400 MHz,  $\text{CDCl}_3$ )  $\delta$ : 8.95 (d,  $J = 4.8$  Hz, 2H), 8.24 (d,  $J = 1.6$  Hz, 1H), 7.62 (d,  $J = 8.0$  Hz, 2H), 7.56 (d,  $J = 8.0$  Hz, 2H), 7.43 (d,  $J = 1.6$  Hz, 1H), 7.39 – 7.26 (m, 6H), 7.21 (d,  $J = 7.2$  Hz, 1H), 7.04 (t,  $J = 7.6$  Hz, 1H), 2.53 (s, 3H), 2.42 (s, 3H), 2.18 (s, 3H);  $^{13}\text{C}$  NMR (100 MHz,  $\text{CDCl}_3$ )  $\delta$ : 159.0, 158.6, 142.4, 139.9, 139.3, 138.9, 138.1, 137.6, 137.3, 136.9, 129.4, 129.2, 129.2, 129.0, 127.4, 125.9, 123.4, 123.3, 122.0, 121.8, 120.1, 118.1, 109.1, 21.4, 21.1, 21.0; IR (ATR): 3359, 2291, 2852, 1658, 1633, 1563, 1515, 1455, 1415, 1315, 1226, 1108, 815; HRMS (EI) calcd for  $\text{C}_{31}\text{H}_{25}\text{N}_3$ : 439.2048  $[\text{M}]^+$ , found 439.2046 ( $[\text{M}]^+$ ).

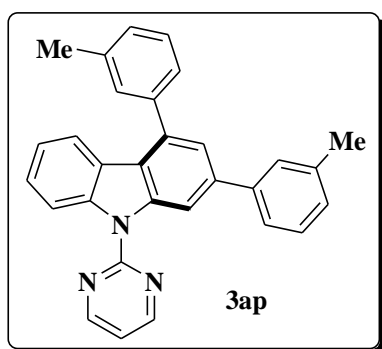

Yield 67%; Mp 132-133 °C;  $^1\text{H}$  NMR (400 MHz,  $\text{CDCl}_3$ )  $\delta$ : 9.11 (s, 1H), 8.91 (d,  $J = 4.8$  Hz, 2H), 8.82 (d,  $J = 8.4$  Hz, 1H), 7.62 (d,  $J = 5.6$  Hz, 2H), 7.55 – 7.33 (m, 8H), 7.24 – 7.11 (m, 3H), 2.52 (s, 3H), 2.49 (s, 3H);  $^{13}\text{C}$  NMR (100 MHz,  $\text{CDCl}_3$ )  $\delta$ : 159.1, 158.0, 141.9, 141.1, 140.1, 139.9, 139.5, 138.3, 138.2, 137.4, 130.0, 128.7, 128.5, 128.4, 127.9, 126.4, 126.2, 125.3, 124.9, 123.6, 122.2, 122.0, 121.9, 116.4, 115.4, 113.2, 21.6, 21.6; IR (ATR): 3073, 2923, 2852, 1579, 1560, 1496, 1452, 0425, 1334, 1311, 1220, 875, 794; HRMS (EI) calcd for  $\text{C}_{30}\text{H}_{23}\text{N}_3$ : 425.1892  $[\text{M}]^+$ , found 425.1898 ( $[\text{M}]^+$ ).

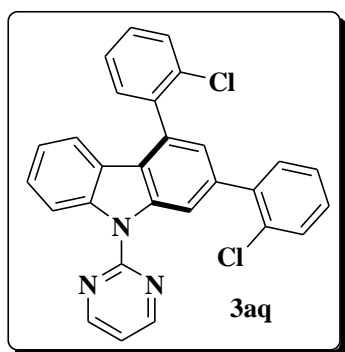

Yield 61%; Mp 135-136 °C;  $^1\text{H}$  NMR (400 MHz,  $\text{CDCl}_3$ )  $\delta$ : 9.08 (s, 1H), 8.88 – 8.84 (m, 3H), 7.71 – 7.54 (m, 4H), 7.41 – 7.32 (m, 3H), 7.43 – 7.31 (m, 3H), 7.18 – 7.09 (m, 2H), 7.06 (d,  $J = 7.9$  Hz, 1H);  $^{13}\text{C}$  NMR (100 MHz,  $\text{CDCl}_3$ )  $\delta$ : 159.0, 158.0, 141.1, 139.8, 139.5, 139.1, 137.2, 134.0, 133.1, 132.9, 132.0, 131.5, 130.0, 129.8, 129.4, 128.5, 127.0, 126.8, 126.6, 125.5, 125.1, 123.0, 122.3, 121.4, 116.4, 116.3, 115.7; IR (ATR): 2921, 2850, 1660, 1633, 1581, 1563, 1494, 1450, 1423, 1400, 1332, 1141, 800, 756; HRMS (EI) calcd for  $\text{C}_{28}\text{H}_{17}\text{Cl}_2\text{N}_3$ : 465.0800, 467.0770, 469.0741  $[\text{M}]^+$ , found 465.0800, 467.0792, 469.0764  $[\text{M}]^+$ .

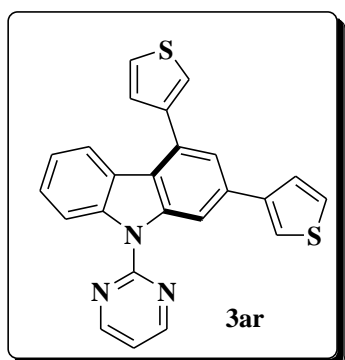

Yield 58%; Mp 236-237 °C;  $^1\text{H}$  NMR (400 MHz,  $\text{CDCl}_3$ )  $\delta$ : 9.12 (d,  $J = 1.6$  Hz, 1H), 8.92 (d,  $J = 4.8$  Hz, 2H), 8.81 (d,  $J = 8.2$  Hz, 1H), 7.62 (dd,  $J = 3.0, 1.2$  Hz, 1H), 7.57 – 7.55 (m, 3H), 7.52 (dd,  $J = 3.0, 1.2$  Hz, 1H), 7.50 – 7.43 (m, 3H), 7.40 (dd,  $J = 4.8, 1.2$  Hz, 1H), 7.22 – 7.15 (m, 2H);  $^{13}\text{C}$  NMR (100 MHz,  $\text{CDCl}_3$ )  $\delta$ : 159.1, 158.0, 143.0, 141.3, 140.0, 139.8, 133.9, 132.0, 129.2, 126.9, 126.3, 126.1, 125.7, 125.2, 123.2, 123.1, 122.7, 122.1, 121.8, 120.6, 116.4, 115.5, 112.8; IR (ATR): 1592, 1575, 1560, 1523, 1490, 1452, 1421, 786, 748; HRMS (EI) calcd for  $\text{C}_{24}\text{H}_{15}\text{N}_3\text{S}_2$ : 409.0707  $[\text{M}]^+$ , found 409.0702  $[\text{M}]^+$ .

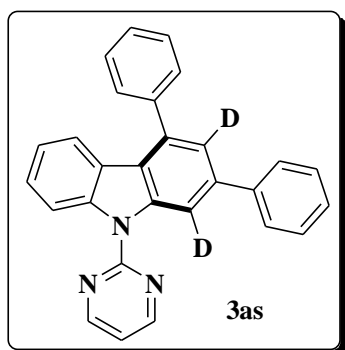

Yield 69%; Mp 178-179 °C;  $^1\text{H}$  NMR (400 MHz,  $\text{CDCl}_3$ )  $\delta$ : 8.91 (d,  $J = 4.8$  Hz, 2H), 8.82 (d,  $J = 8.4$  Hz, 1H), 7.85 – 7.78 (m, 2H), 7.70 – 7.68 (m, 2H), 7.63 – 7.34 (m, 8H), 7.19 (t,  $J = 4.8$  Hz, 1H), 7.14 – 7.08 (m, 1H);  $^{13}\text{C}$  NMR (100 MHz,  $\text{CDCl}_3$ )  $\delta$ : 159.1, 158.0, 141.3, 141.1, 140.0, 139.9, 139.2, 137.3, 129.4, 128.8, 128.6, 127.7, 127.2, 126.3, 125.2, 122.3, 122.0, 121.9, 116.4, 115.5; IR (ATR): 2919, 1850, 1581, 1562, 1459, 1444, 1427, 1386, 1330, 800, 750; HRMS (EI) calcd for  $\text{C}_{28}\text{H}_{17}\text{D}_2\text{N}_3$ : 399.1705  $[\text{M}]^+$ , found 399.1707 ( $[\text{M}]^+$ ).

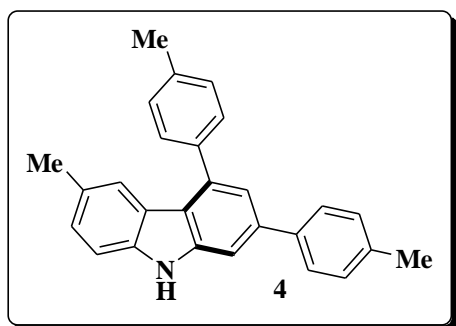

Yield 85 %; Mp 190-191 °C;  $^1\text{H}$  NMR (400 MHz,  $\text{CDCl}_3$ )  $\delta$ : 7.95 (brs, 1H), 7.54 – 7.50 (m, 4H), 7.46 (d,  $J = 0.8$  Hz, 1H), 7.32 – 7.23 (m, 4H), 7.21 – 7.17 (dm, 3H), 7.09 (d,  $J = 8.0$  Hz, 1H), 2.43 (s, 3H), 2.33 (s, 3H), 2.27 (s, 3H);  $^{13}\text{C}$  NMR (100 MHz,  $\text{CDCl}_3$ )  $\delta$ : 140.9, 138.8, 138.8, 138.4, 138.4, 137.8, 137.3, 136.9, 129.5, 129.1, 129.1, 128.3, 127.3, 126.9, 123.1, 122.4, 120.7, 119.8, 110.1, 107.5, 21.6, 21.4, 21.1; IR (ATR): 3454, 3022, 2952, 2920, 2864, 1608, 1576, 1558, 1516, 1479, 1442, 1325, 1302, 820, 810. HRMS (EI) calcd for  $\text{C}_{27}\text{H}_{23}\text{N}$ : 361.1830 ( $[\text{M}]^+$ ), found 361.1833 ( $[\text{M}]^+$ ).

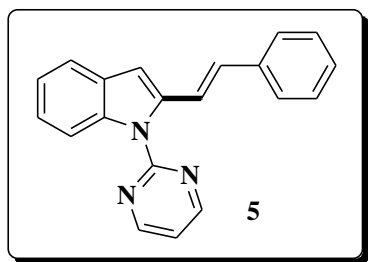

Yield 79%; Mp 89-90 °C;  $^1\text{H}$  NMR (400 MHz,  $\text{CDCl}_3$ )  $\delta$ : 8.87 (d,  $J = 4.8$  Hz, 2H), 8.33 (d,  $J = 8.2$  Hz, 1H), 7.73 (d,  $J = 16.0$  Hz, 1H), 7.67 – 7.62 (m, 1H), 7.53 (d,  $J = 7.3$  Hz, 2H), 7.38 (t,  $J = 7.6$  Hz, 2H), 7.33 – 7.16 (m, 5H), 7.05 (s, 1H);  $^{13}\text{C}$  NMR (100 MHz,  $\text{CDCl}_3$ )  $\delta$ : 158.3, 158.2, 138.8, 137.5, 137.4, 129.7, 129.4, 128.7, 127.6, 126.6, 123.6, 122.4, 120.7, 120.4, 117.3, 114.0, 105.3; IR (ATR): 3052, 2962, 1562, 1450, 1425, 1348, 1261, 1089, 1018, 802; HRMS (EI) calcd for  $\text{C}_{20}\text{H}_{15}\text{N}_3$ : 297.1266 ( $[\text{M}]^+$ ), found 297.1273 ( $[\text{M}]^+$ ).

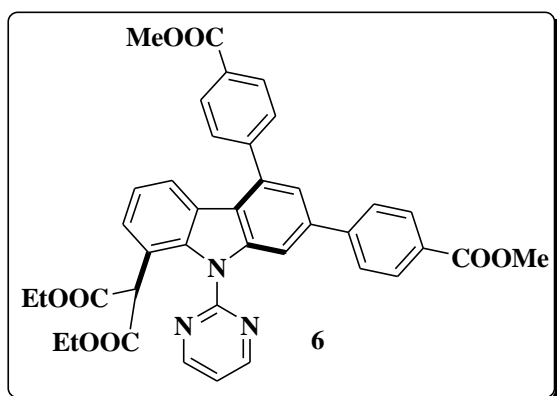

Yield 62%; Mp 122-123 °C;  $^1\text{H}$  NMR (400 MHz,  $\text{CDCl}_3$ )  $\delta$ : 8.85 (d,  $J = 4.8$  Hz, 2H), 8.64 (d,  $J = 1.6$  Hz, 1H), 8.26 (d,  $J = 8.4$  Hz, 2H), 8.15 (d,  $J = 8.4$  Hz, 2H), 7.80 (d,  $J = 8.4$  Hz, 2H), 7.72 (d,  $J = 8.4$  Hz, 2H), 7.58 (d,  $J = 6.8$  Hz, 1H), 7.48 (d,  $J = 1.6$  Hz, 1H), 7.32 – 7.26 (m, 2H), 7.16 (t,  $J = 7.8$  Hz, 1H), 4.60 (s, 1H), 4.28 – 4.15 (m, 4H), 4.03 (s, 3H), 3.97 (s, 3H), 1.24 (t,  $J = 7.2$  Hz, 6H);  $^{13}\text{C}$  NMR (100 MHz,  $\text{CDCl}_3$ )  $\delta$ : 168.3, 167.0, 167.0, 159.2, 158.9, 145.8, 145.3, 142.4, 139.3, 138.5, 136.6, 130.1, 130.0, 129.7, 129.4, 129.0, 128.8, 127.5, 126.6, 123.6, 122.8, 122.7, 122.1, 119.9, 118.1, 111.6, 61.9, 55.7, 52.3, 52.2, 14.0; IR (ATR): 3361, 3191, 2921, 2852, 1724, 1564, 1413, 1280, 1189, 1112, 1020, 854, 773; HRMS (EI) calcd for  $\text{C}_{39}\text{H}_{33}\text{N}_3\text{O}_8$ : 671.2268 ( $[\text{M}]^+$ ), found 671.2269 ( $[\text{M}]^+$ ).

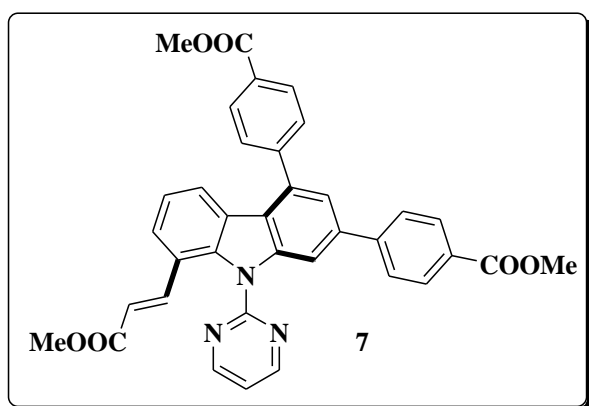

Yield 81%; Mp 102- 103 °C;  $^1\text{H}$  NMR (400 MHz,  $\text{CDCl}_3$ )  $\delta$ : 8.83 (d,  $J = 4.8$  Hz, 2H), 8.37 (d,  $J = 1.4$  Hz, 1H), 8.17 (d,  $J = 8.2$  Hz, 2H), 8.05 (d,  $J = 8.4$  Hz, 2H), 7.70 (d,  $J = 8.4$  Hz, 2H), 7.66 (d,  $J = 8.2$  Hz, 2H), 7.51 (d,  $J = 7.6$  Hz, 1H), 7.41 (d,  $J = 1.4$  Hz, 1H), 7.33 – 7.26 (m, 3H), 7.03 (t,  $J = 7.8$  Hz, 1H), 6.21 (d,  $J = 15.8$  Hz, 1H), 3.94 (s, 3H), 3.88 (s, 3H), 3.64 (s, 3H);  $^{13}\text{C}$  NMR (100 MHz,  $\text{CDCl}_3$ )  $\delta$ : 167.2, 167.0, 167.0, 158.9, 158.9, 145.7, 145.3, 143.0, 142.0, 139.0, 138.8, 136.8, 130.1, 130.0, 129.8, 129.4, 129.0, 127.5, 126.2, 125.8, 123.9, 123.3, 122.1, 121.9, 121.3, 118.9, 116.7, 110.7, 52.3, 52.2, 51.5; IR (ATR): 2919, 2850, 1720, 1633, 1608, 1563, 1434, 1413, 1305, 1278, 1168, 1105, 852, 771; HRMS (EI) calcd for  $\text{C}_{36}\text{H}_{27}\text{N}_3\text{O}_6$ : 597.1900 ( $[\text{M}]^+$ ), found 597.1897 ( $[\text{M}]^+$ ).

## References:

- 1 Y. Li, B. J. Li, W. H. Wang, W. P. Huang, X. S. Zhang, K. Chen and Z. J. Shi, *Angew. Chem., Int. Ed.*, 2011, **50**, 2115.
- 2 P. M. Boyer, C. P. Roy, J. M. Bielski and J. S. Merola, *Inorg. Chim. Acta*, 1996, **245**, 7.
- 3 L. Ackermann and A. V. Lygin, *Org. Lett.*, 2011, **13**, 3332.
- 4 J. Shi, B. Zhou, Y. Yang and Y. Li, *Org. Biomol. Chem.*, 2012, **10**, 8953.
- 5 C. Pan, H. Jin, P. Xu, X. Liu, Y. Cheng and C. Zhu, *J. Org. Chem.*, 2013, **78**, 9494.
- 6 B. Li, J. Ma, W. Xie, H. Song, S. Xu and B. Wang, *Chem. –Eur. J.*, 2013, **19**, 11863.
- 7 (a) L. Yang, L. Zhao and C. J. Li, *Chem. Commun.*, 2010, **46**, 4184; (b) J. Zheng and S. L. You, *Chem. Commun.*, 2014, **50**, 8204; (c) S. Samala, P. Pallavi, R. Kumar, R. K. Arigela, G. Singh, R. S. Ampapathi, A. Priya, S. Datta, A. Patra and B. Kundu, *Chem. –Eur. J.*, 2014, **20**, 17653.



# <sup>1</sup>H and <sup>13</sup>C NMR spectra of products 3aa-3qa, 3ba-3sa and 4-7:

## 3aa

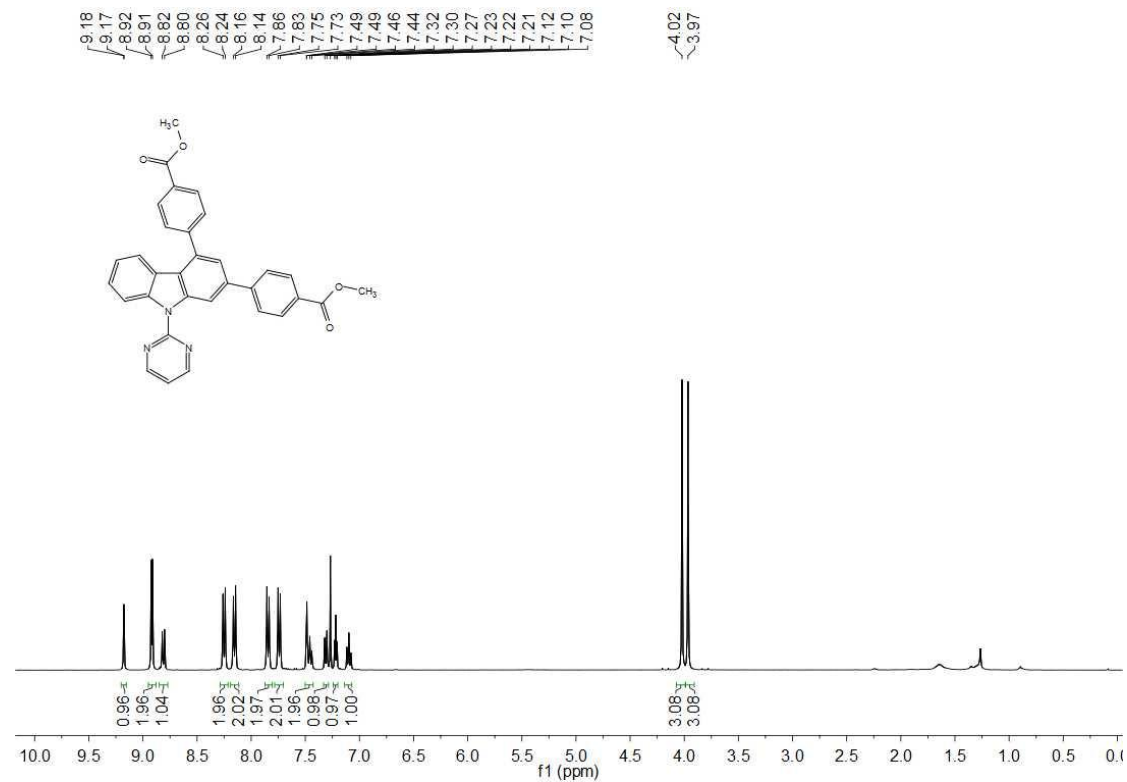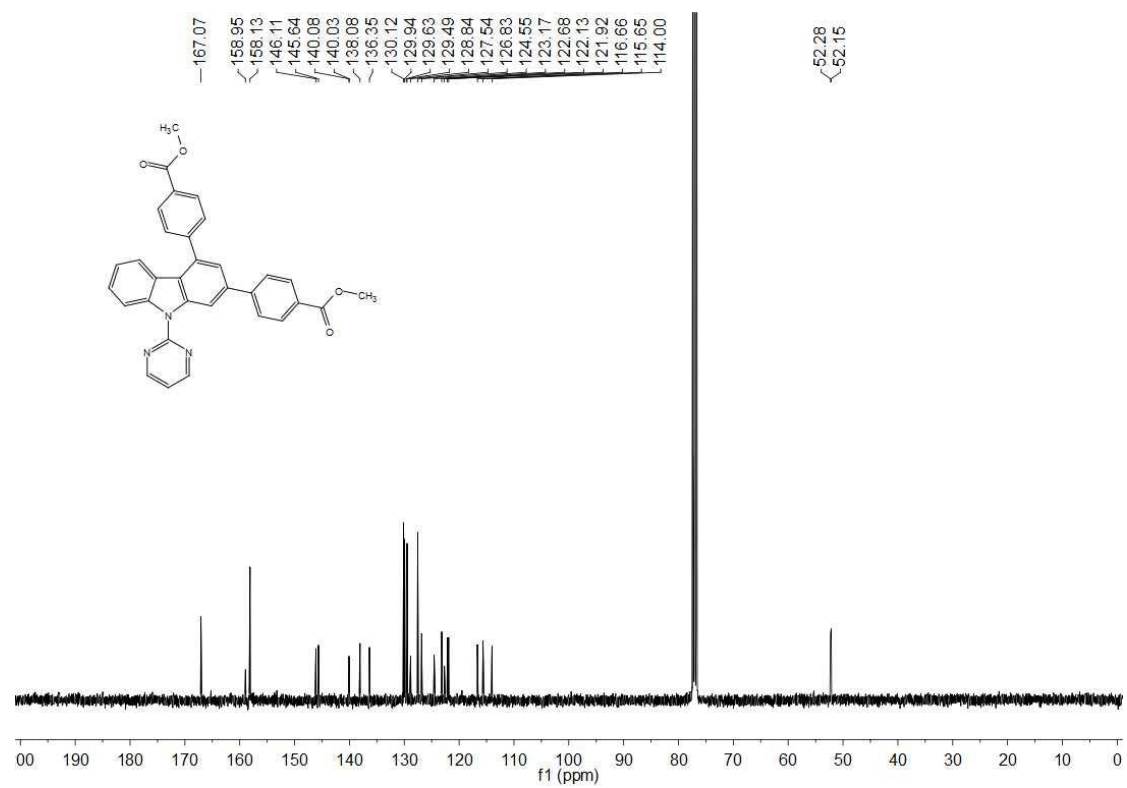

**3ba**

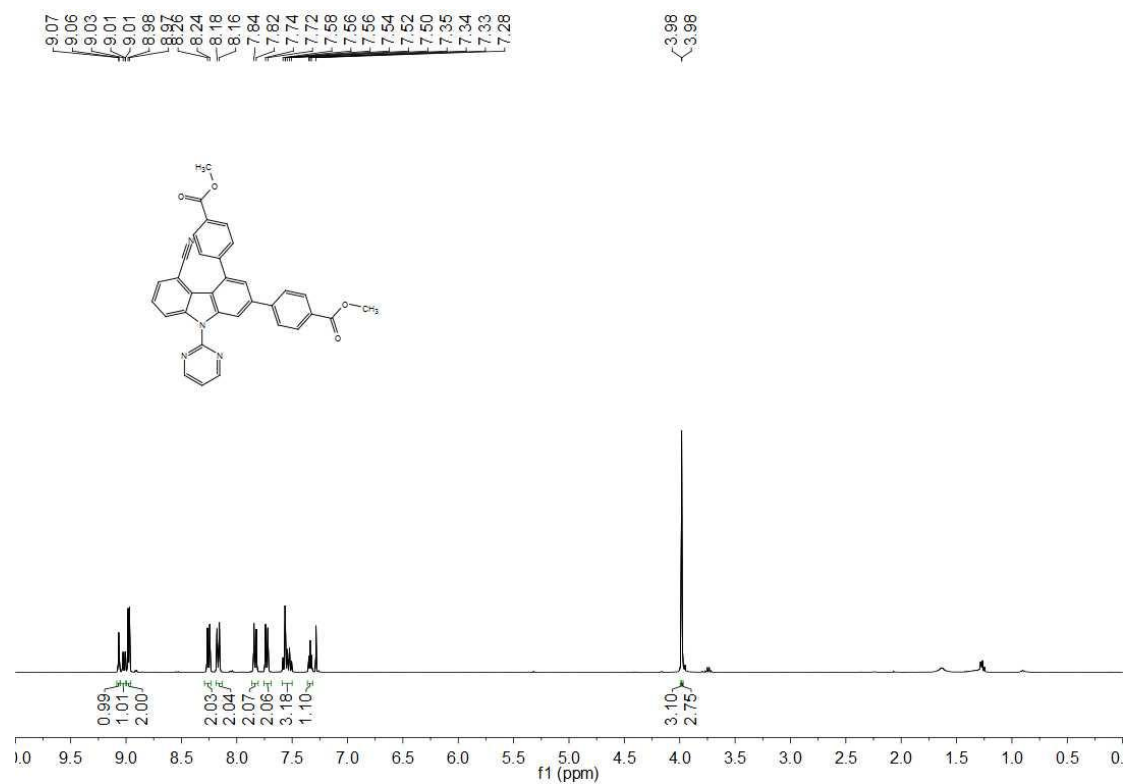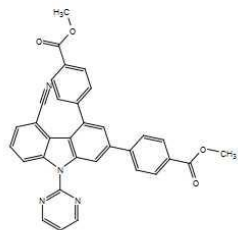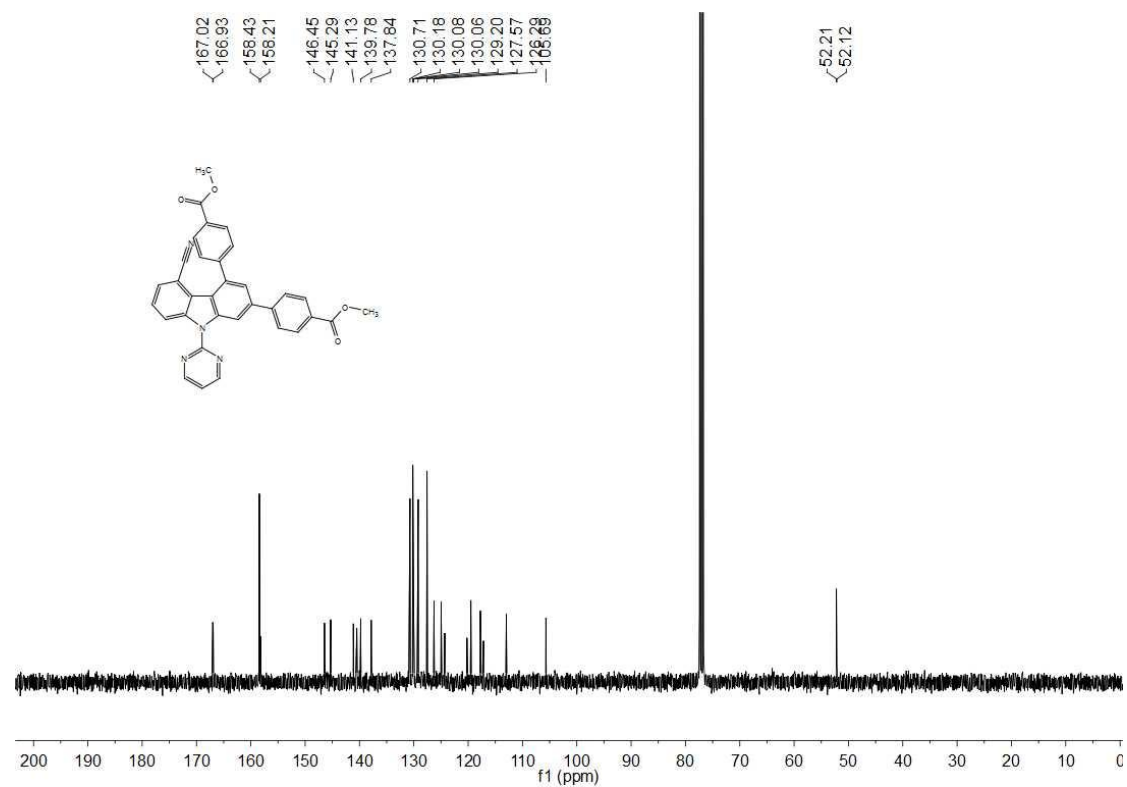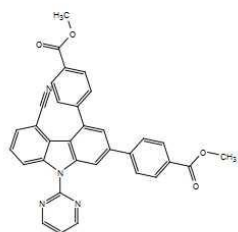

**3ca**

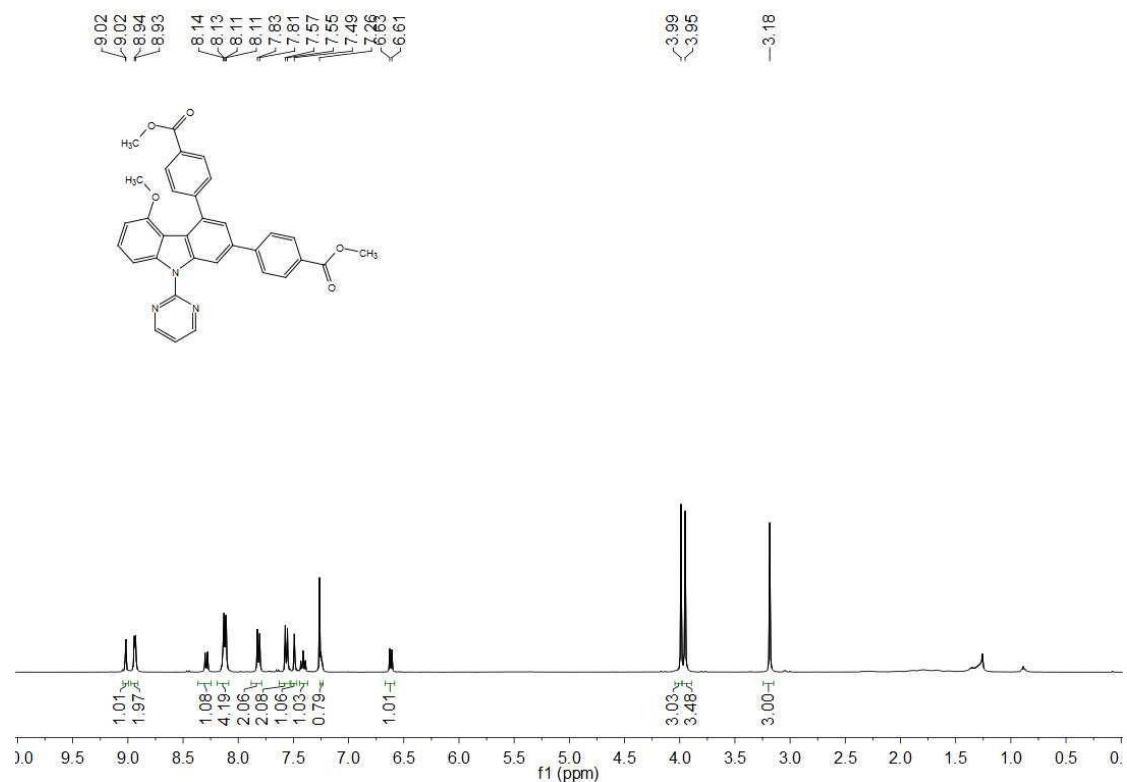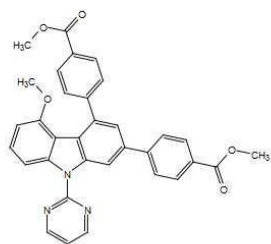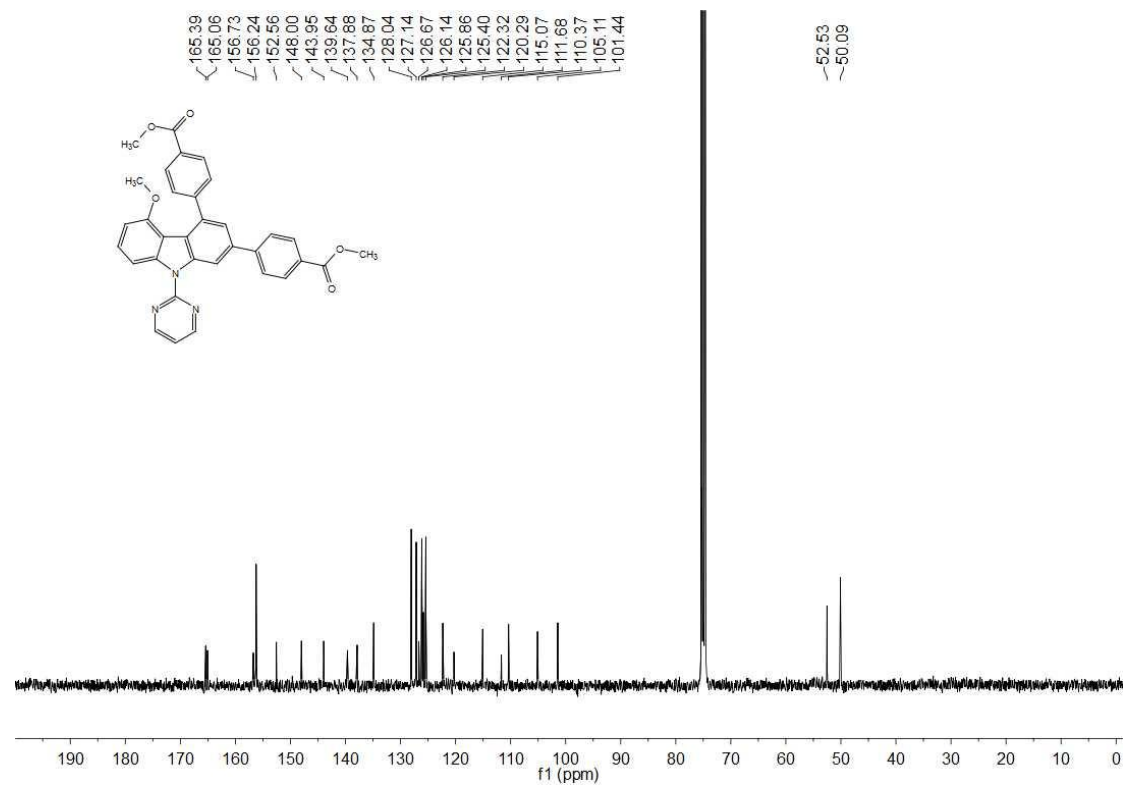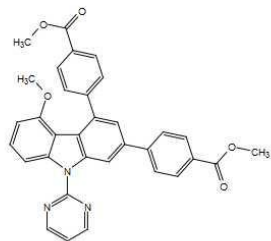

### 3da

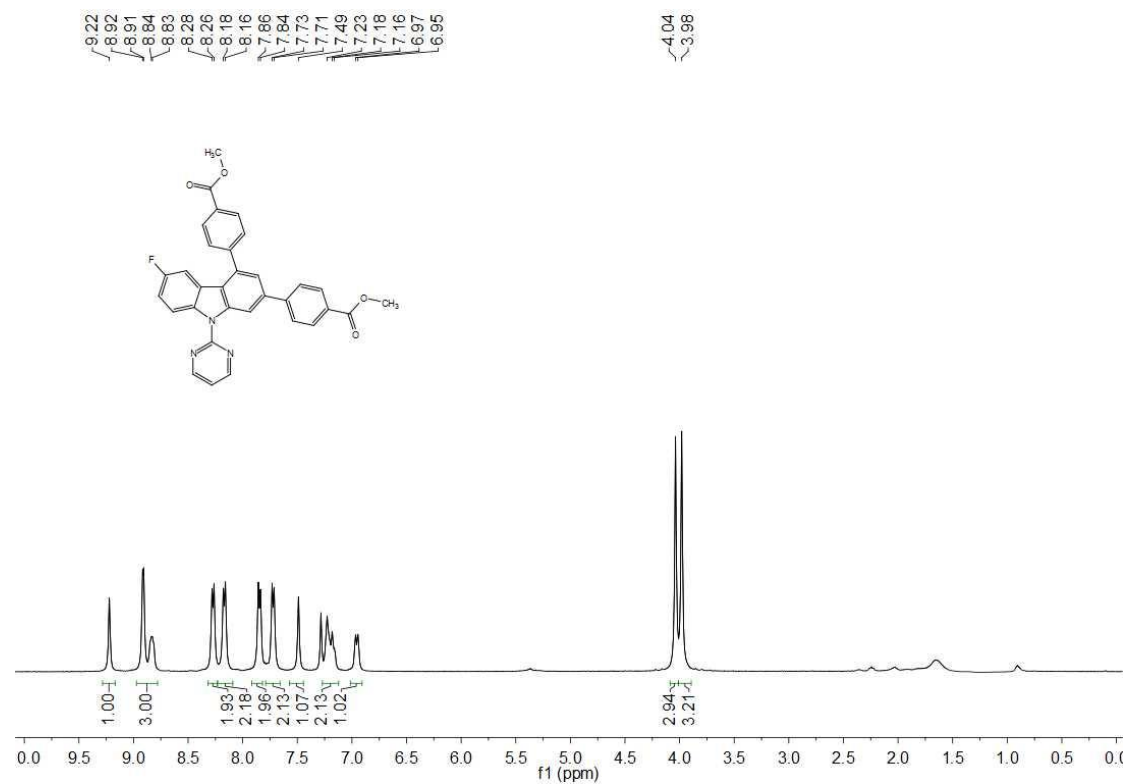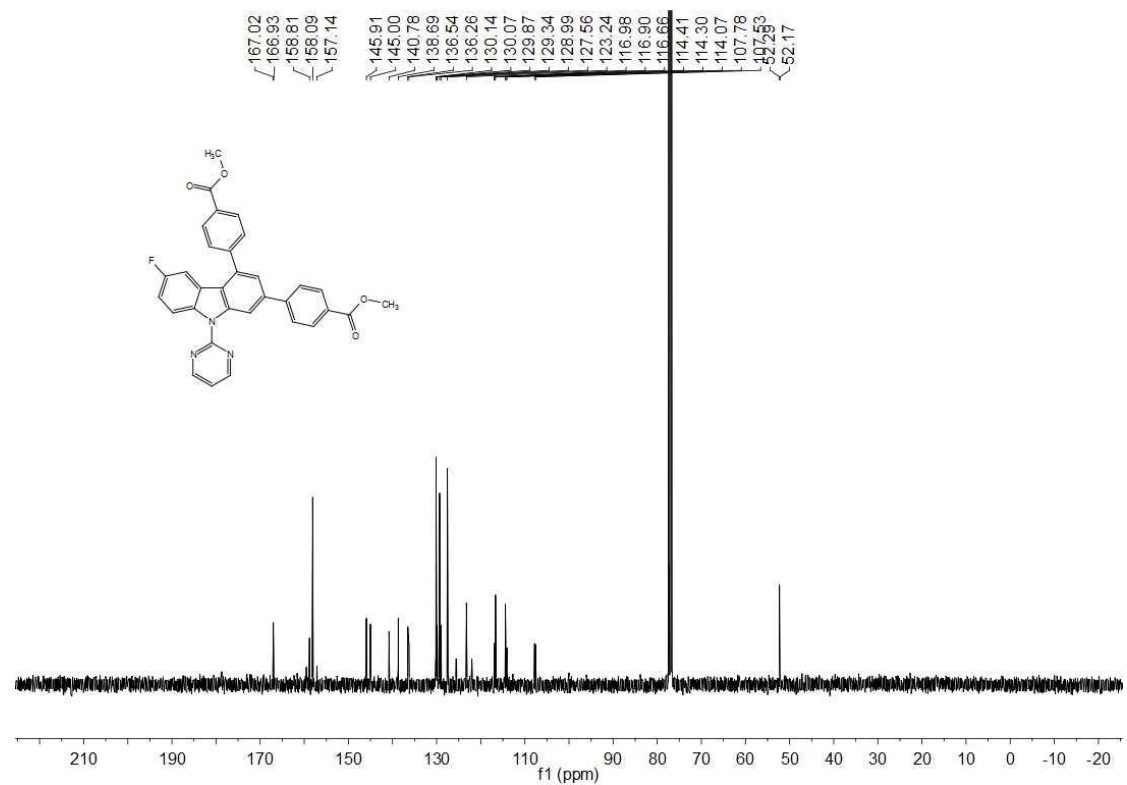

3ea

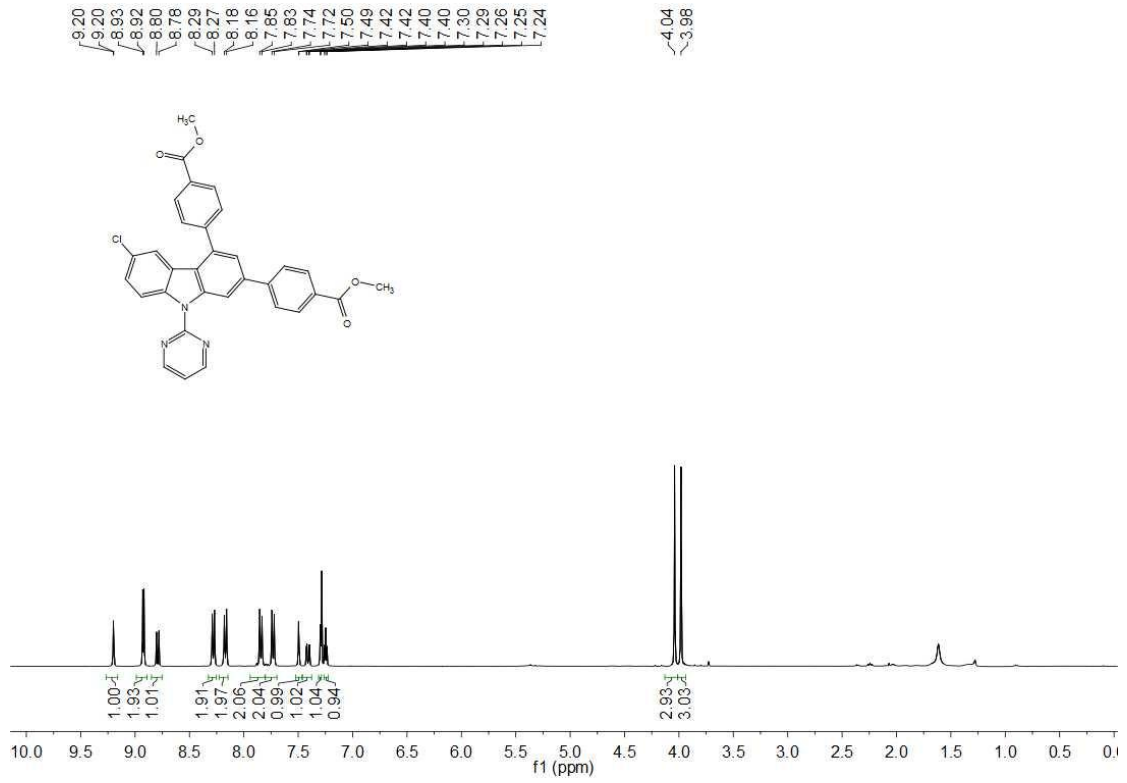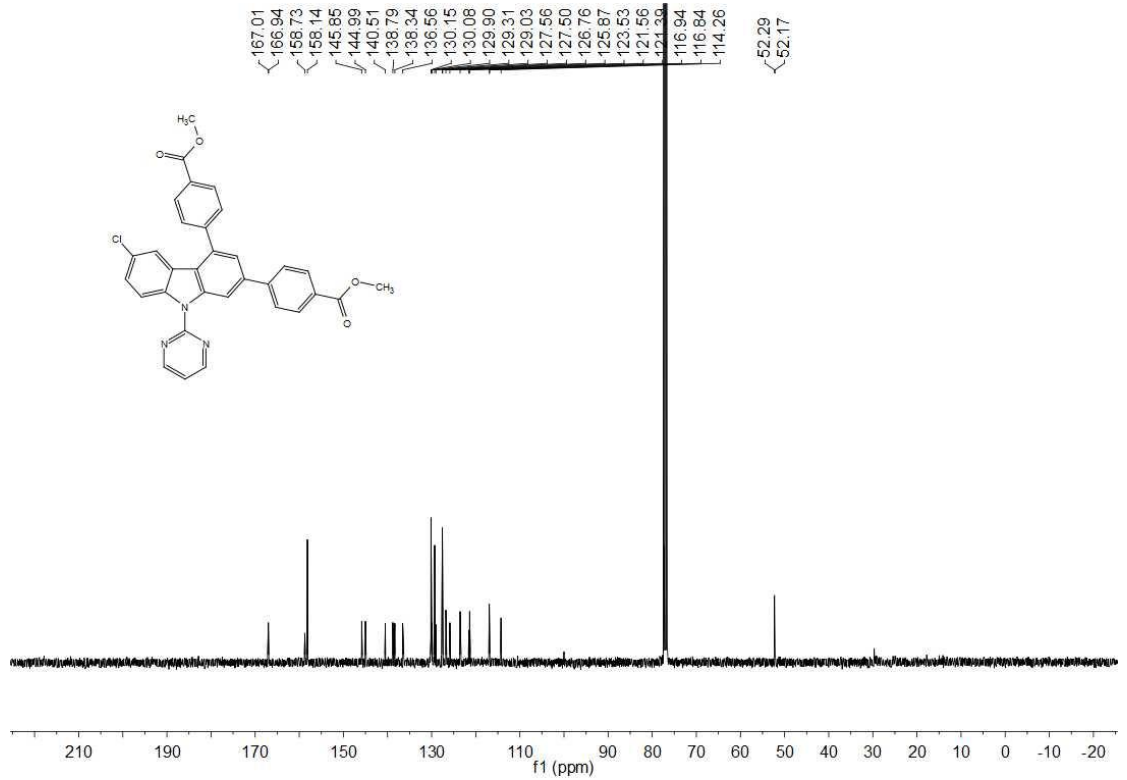

**3fa**

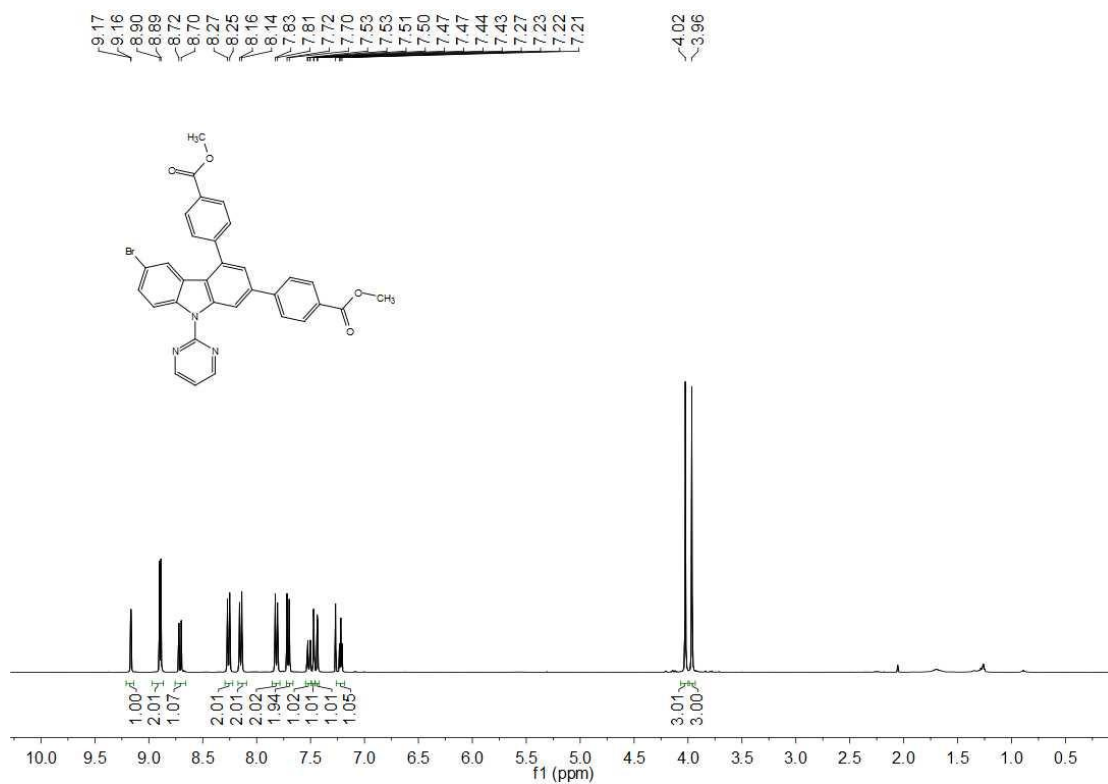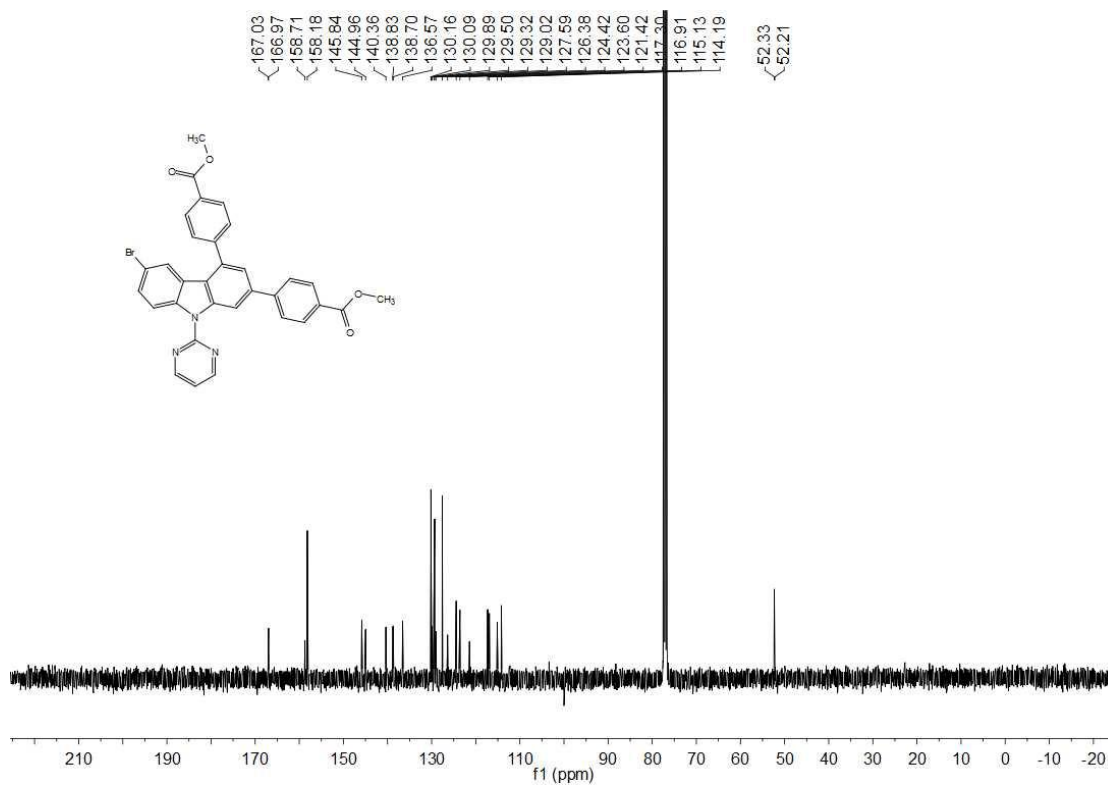

**3ga**

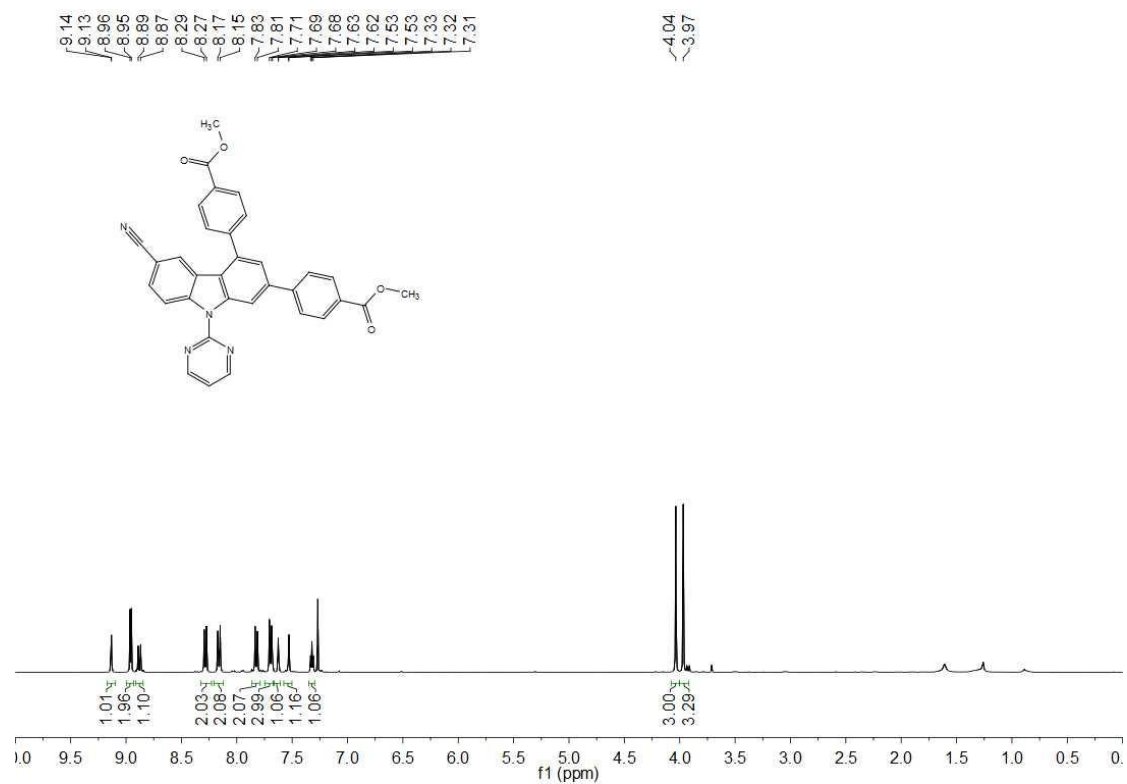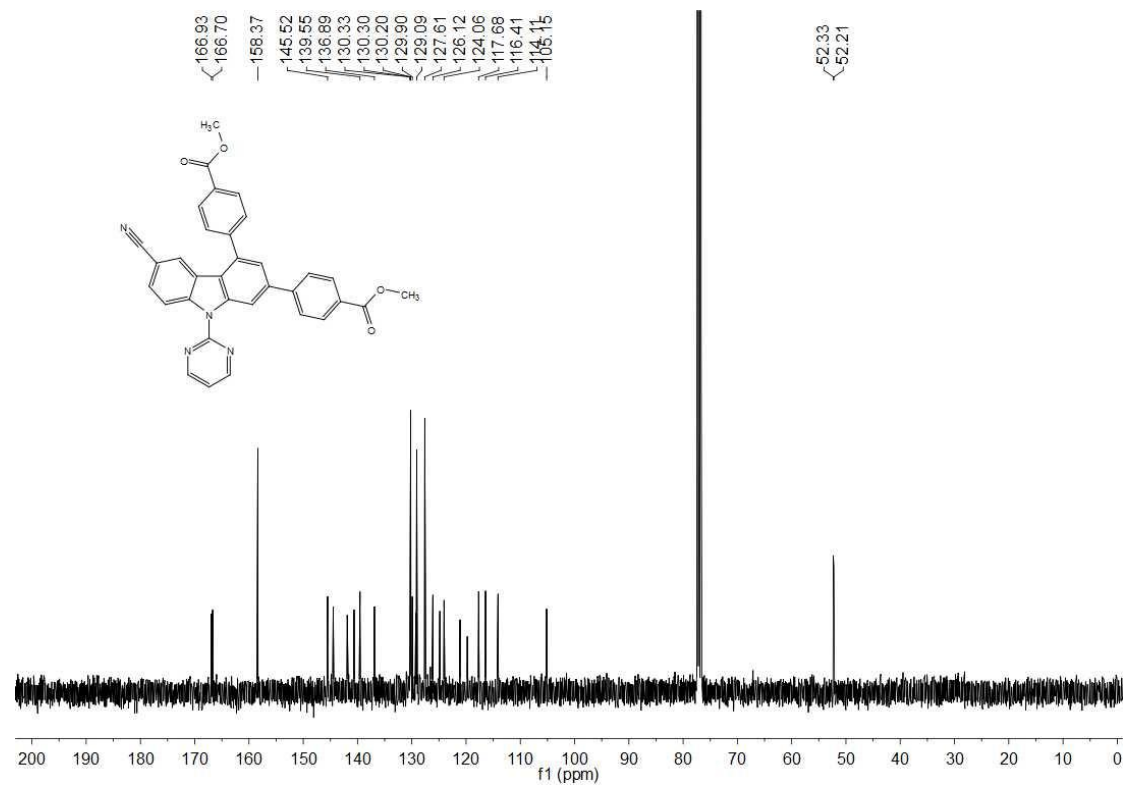

**3ha**

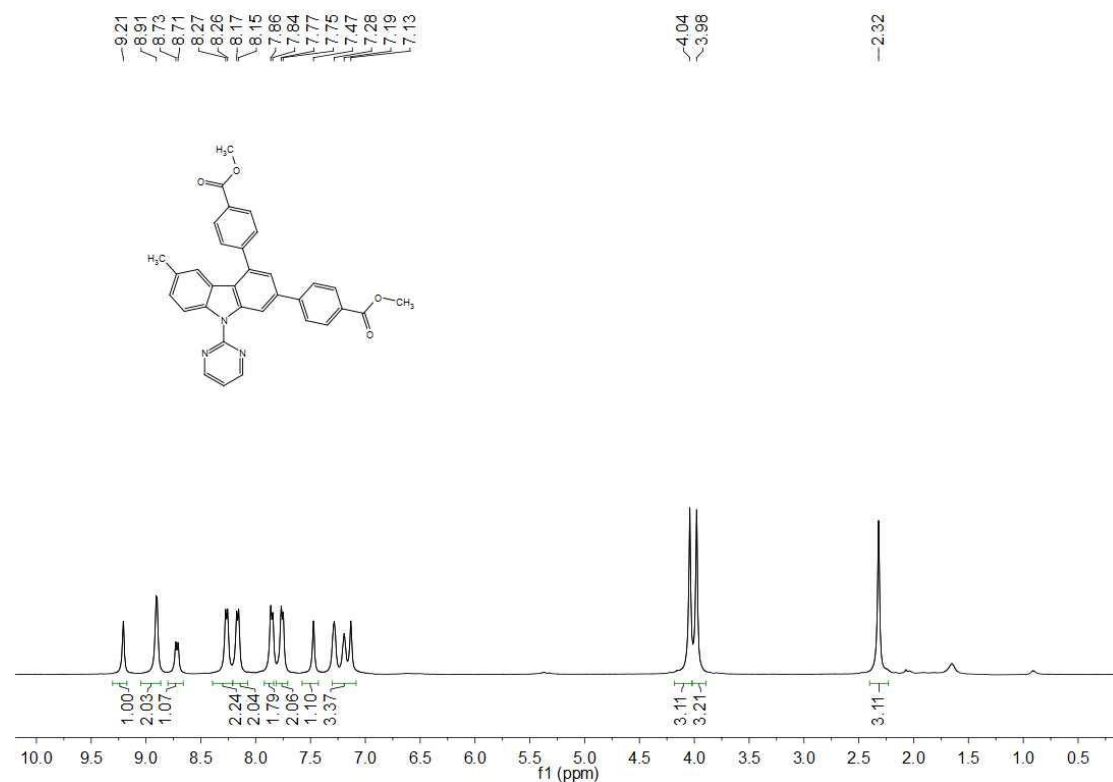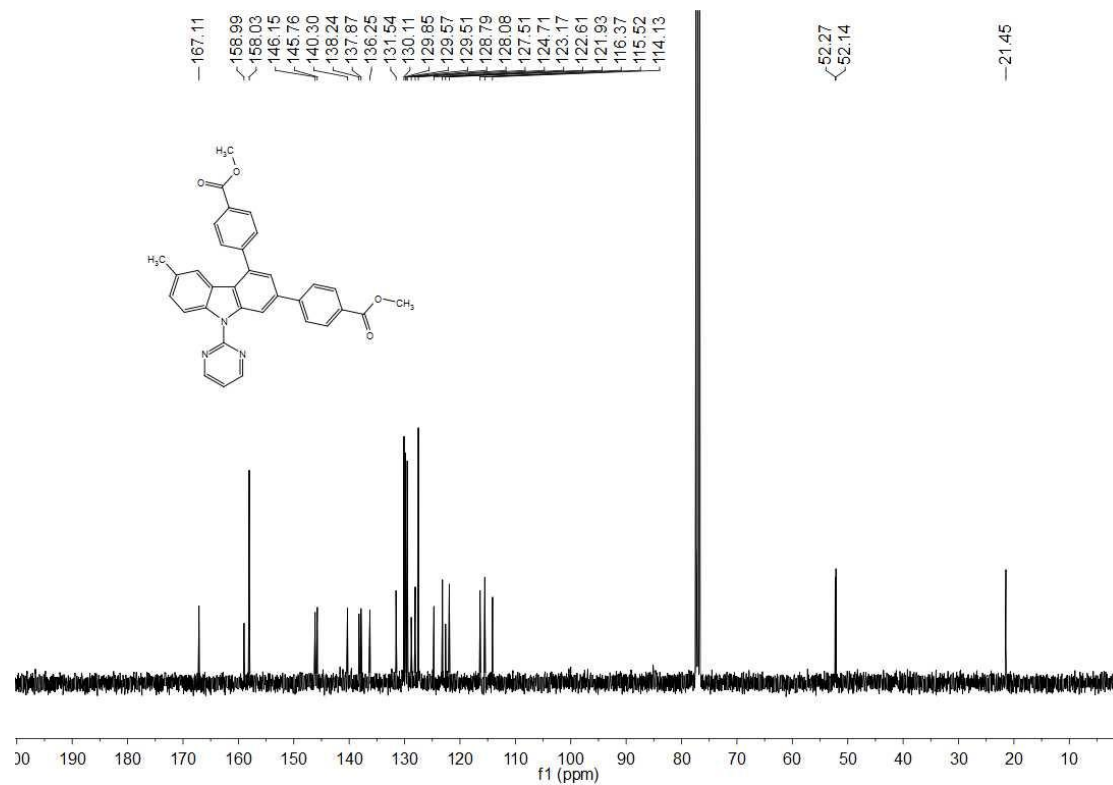



**3ia**

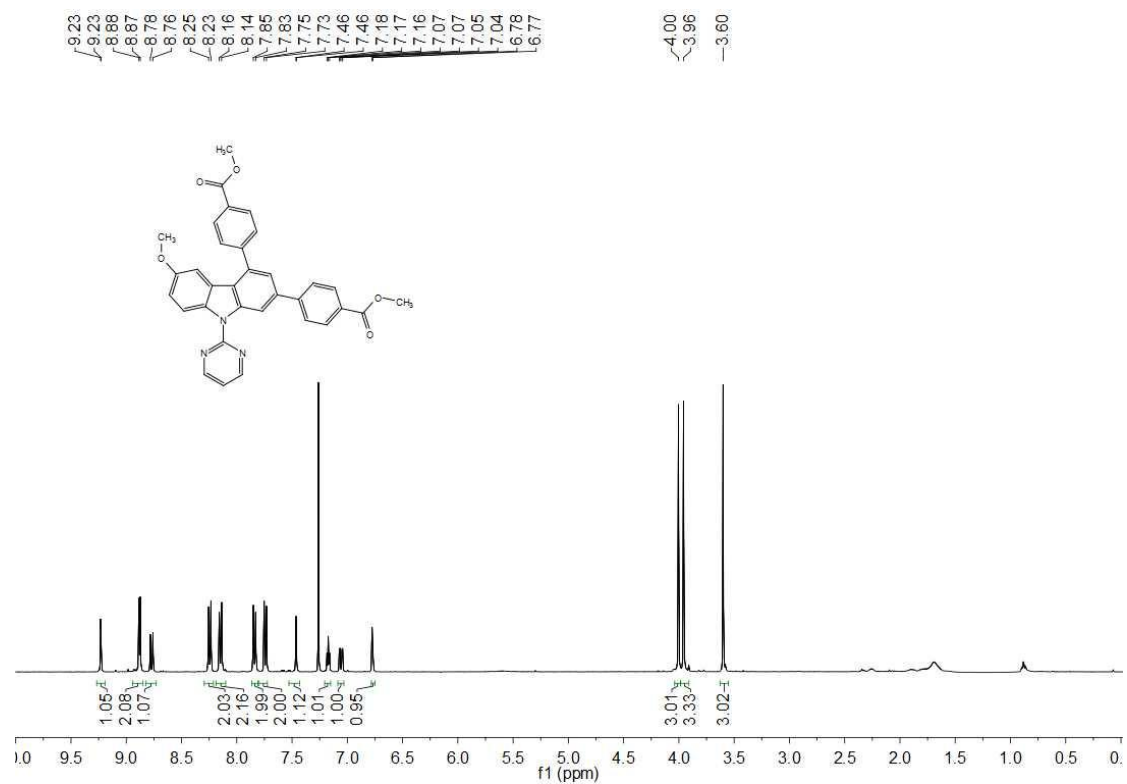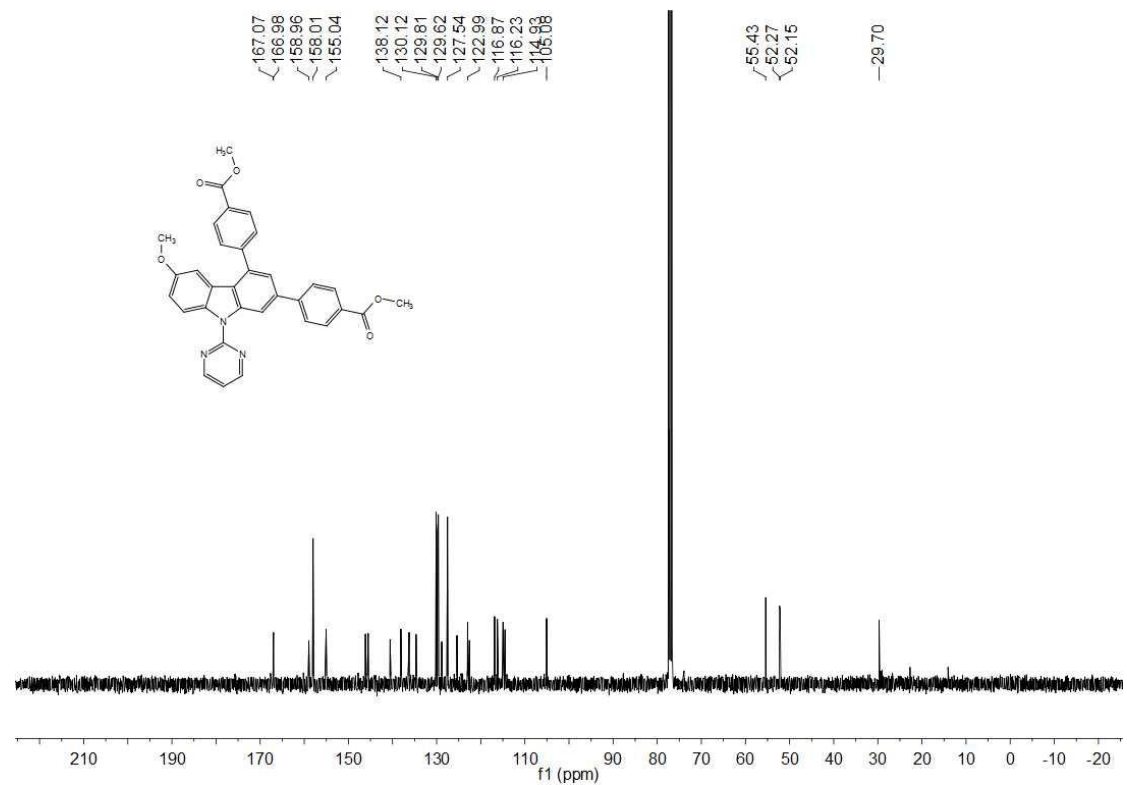

3ja

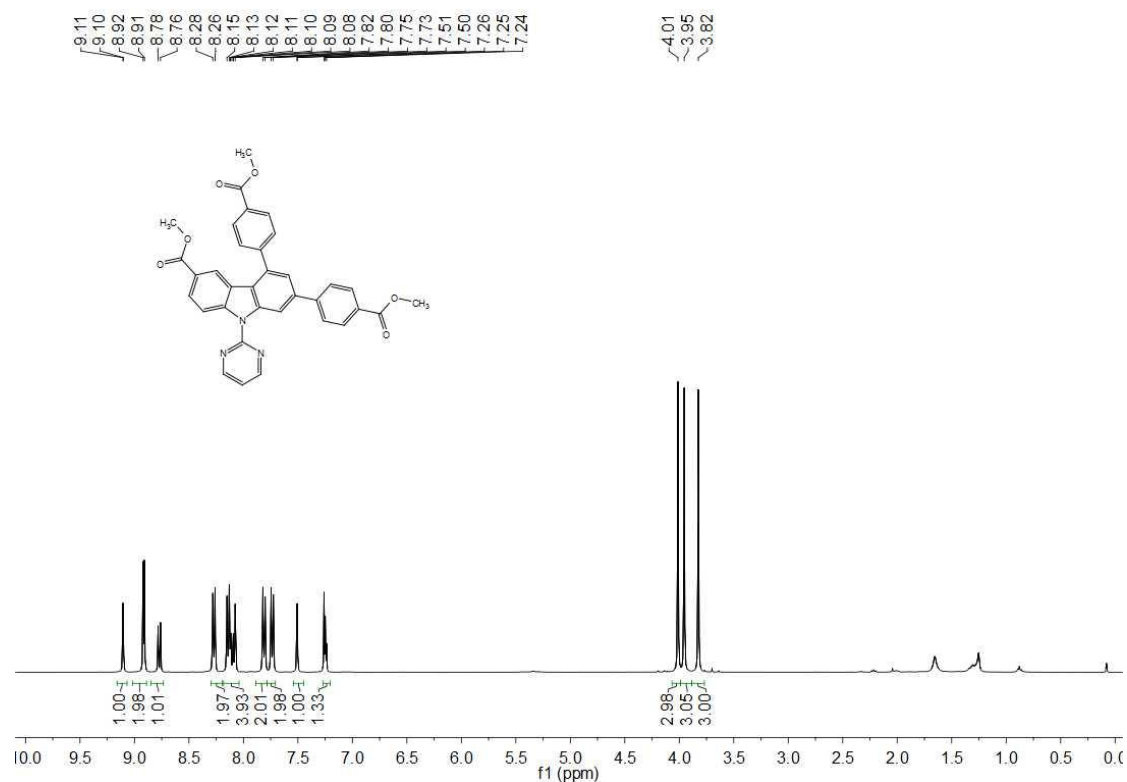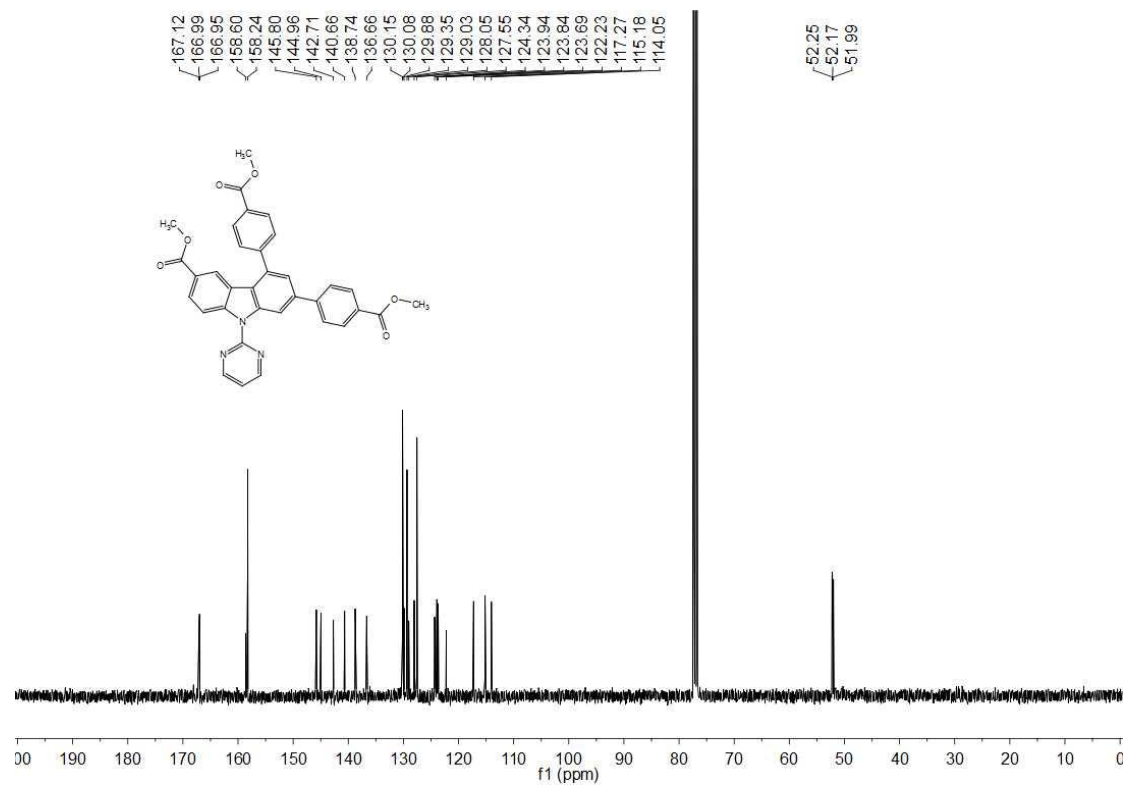

### 3ka

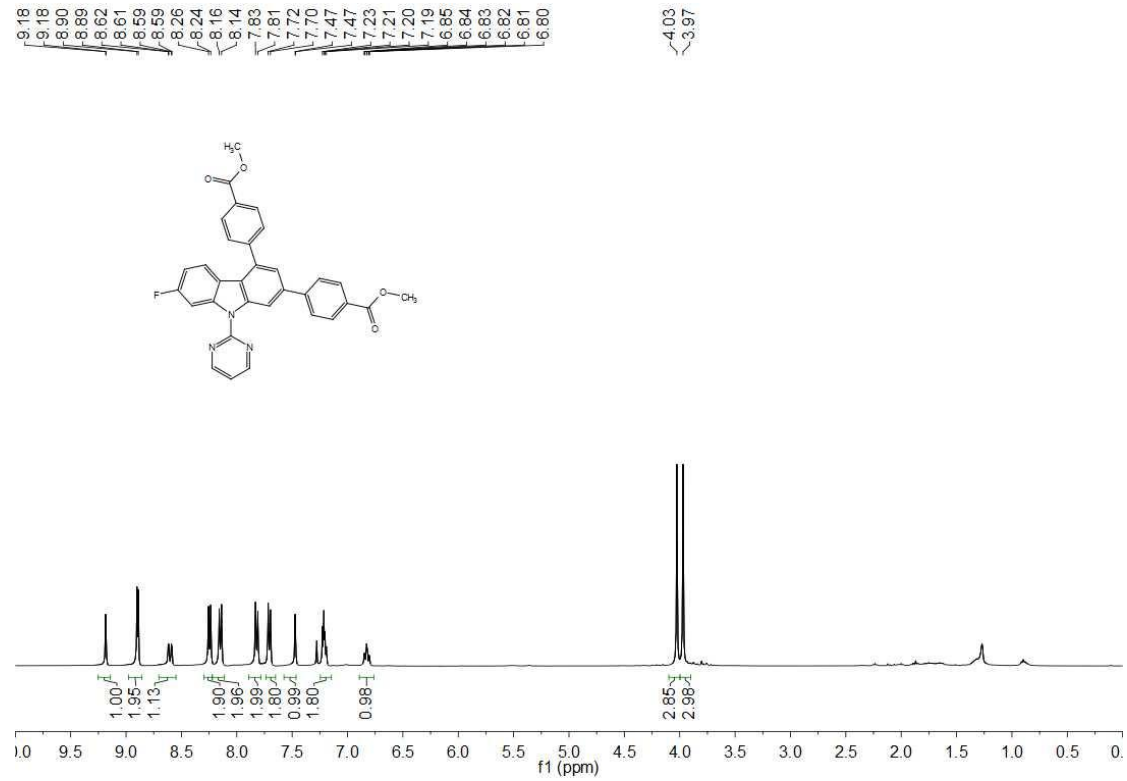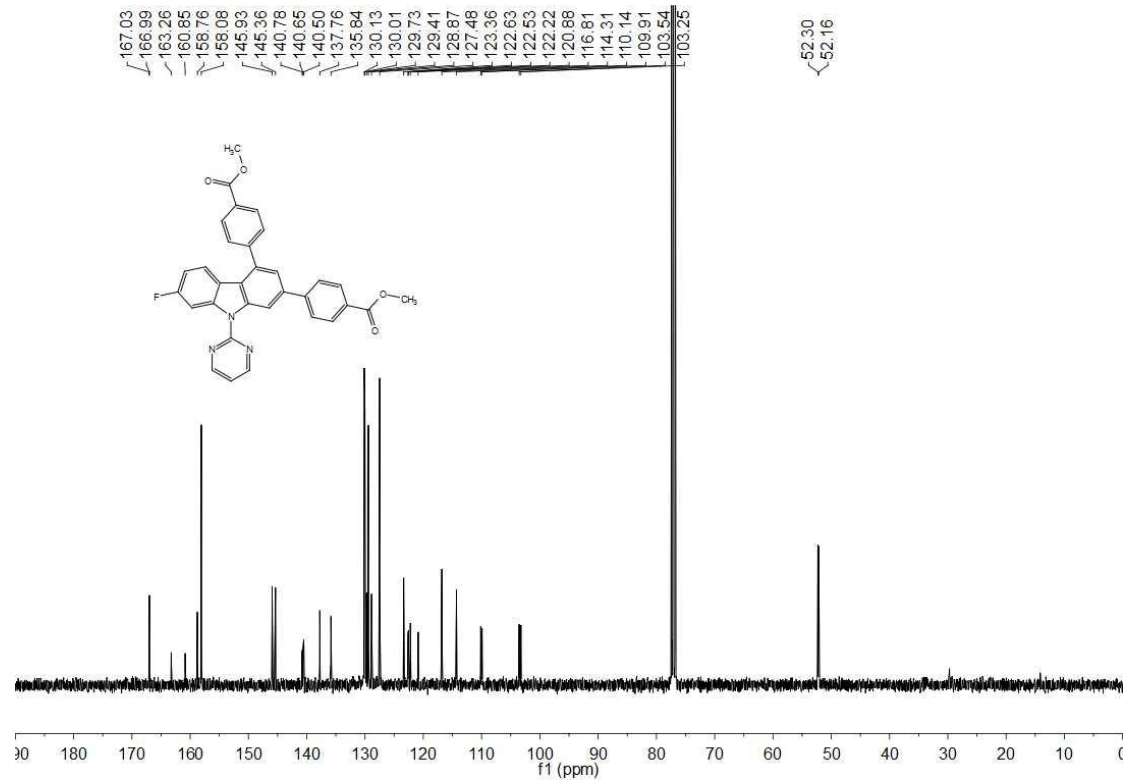

**3la**

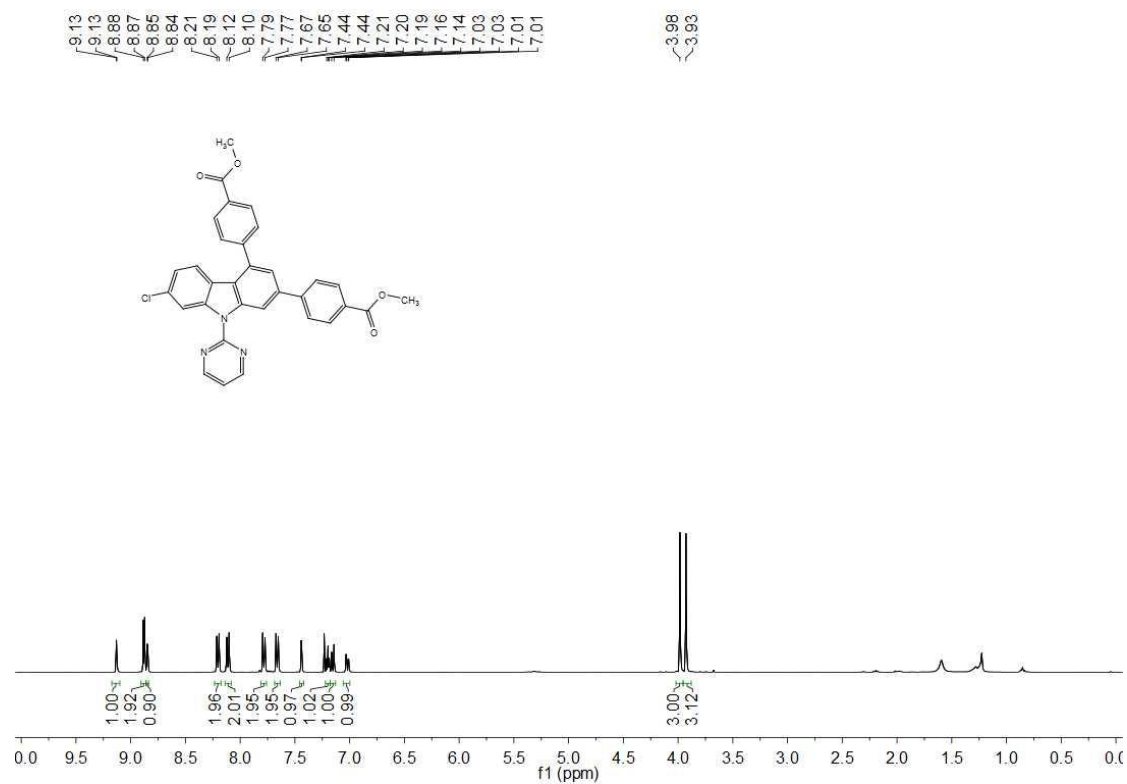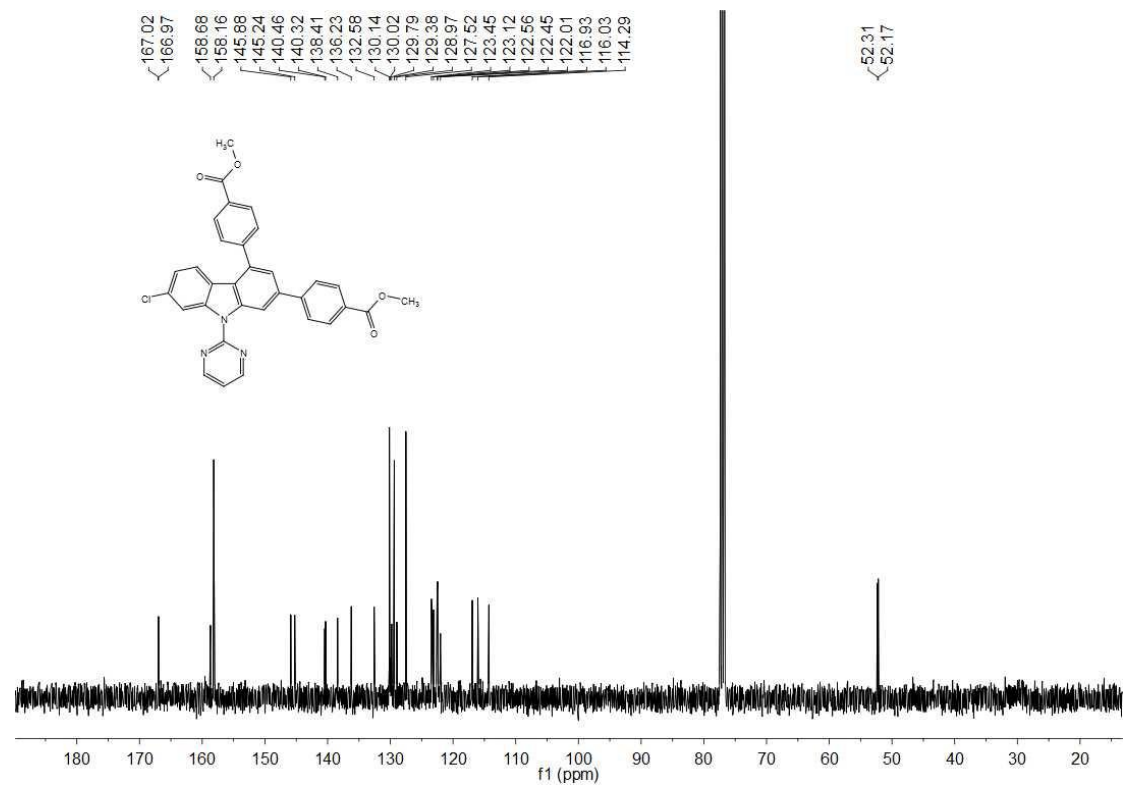

### 3ma

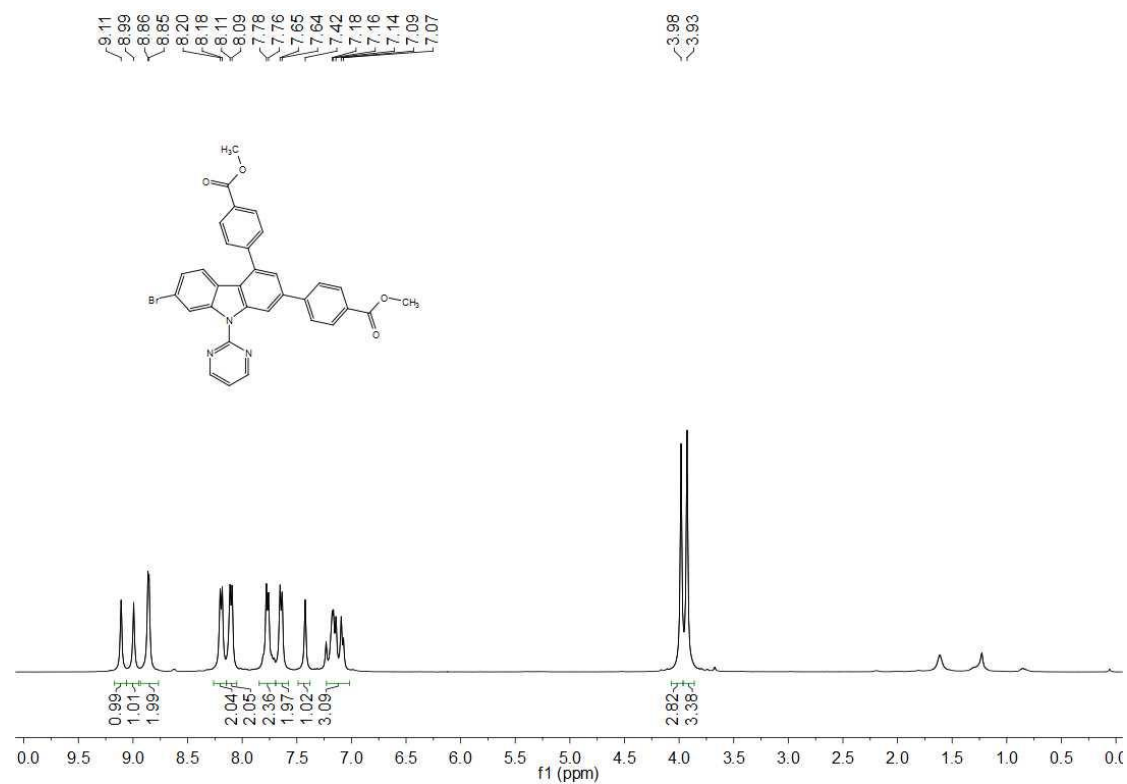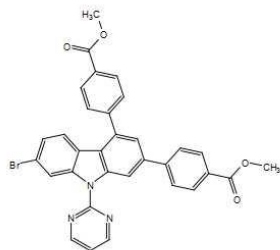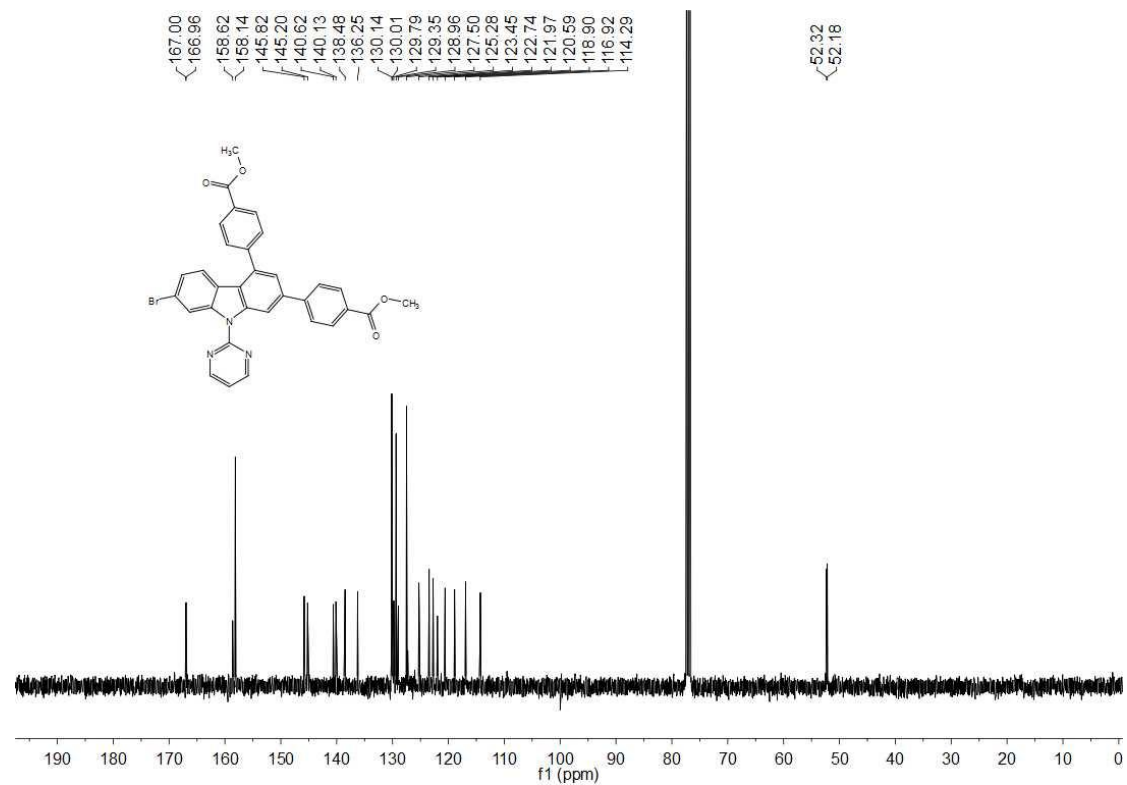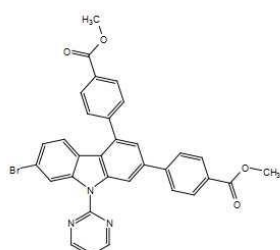

**3na**

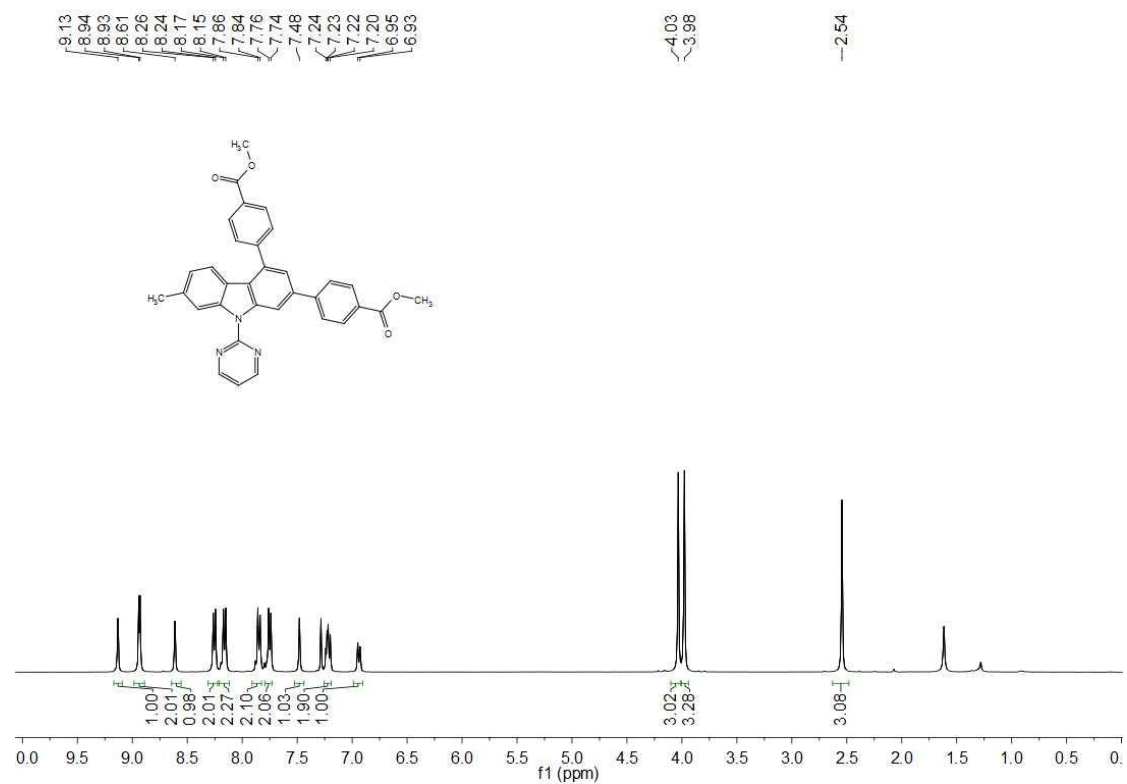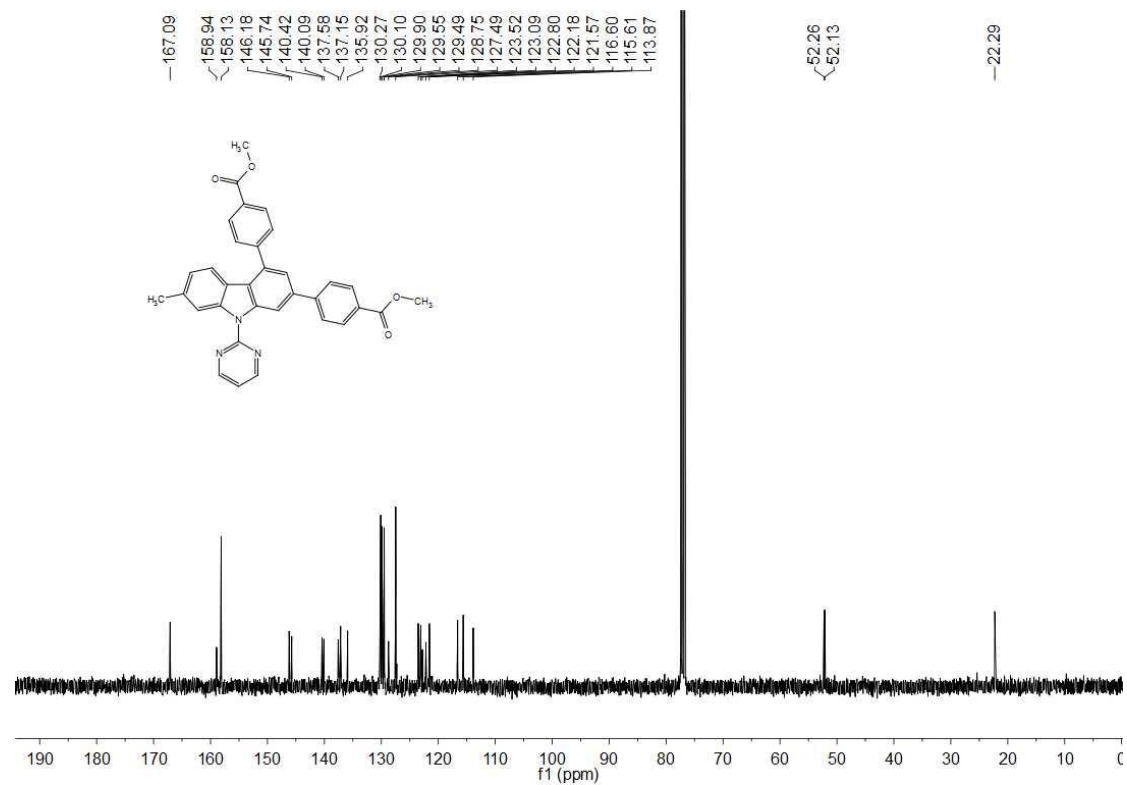

30a

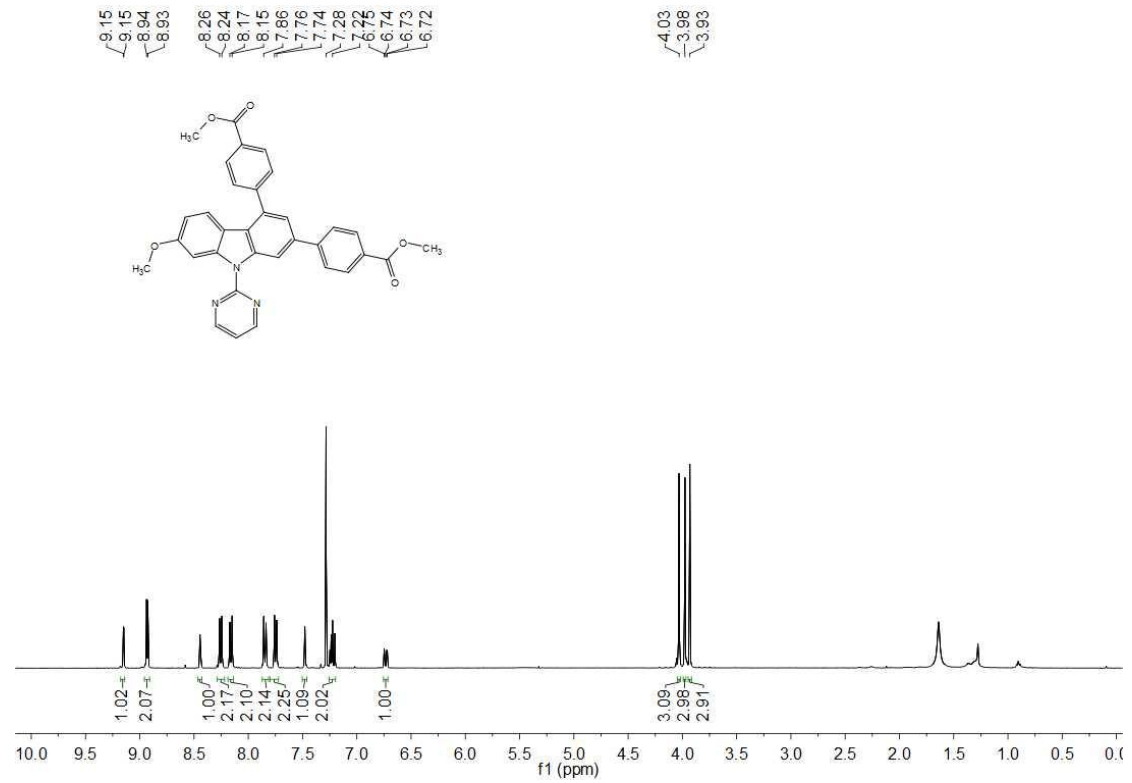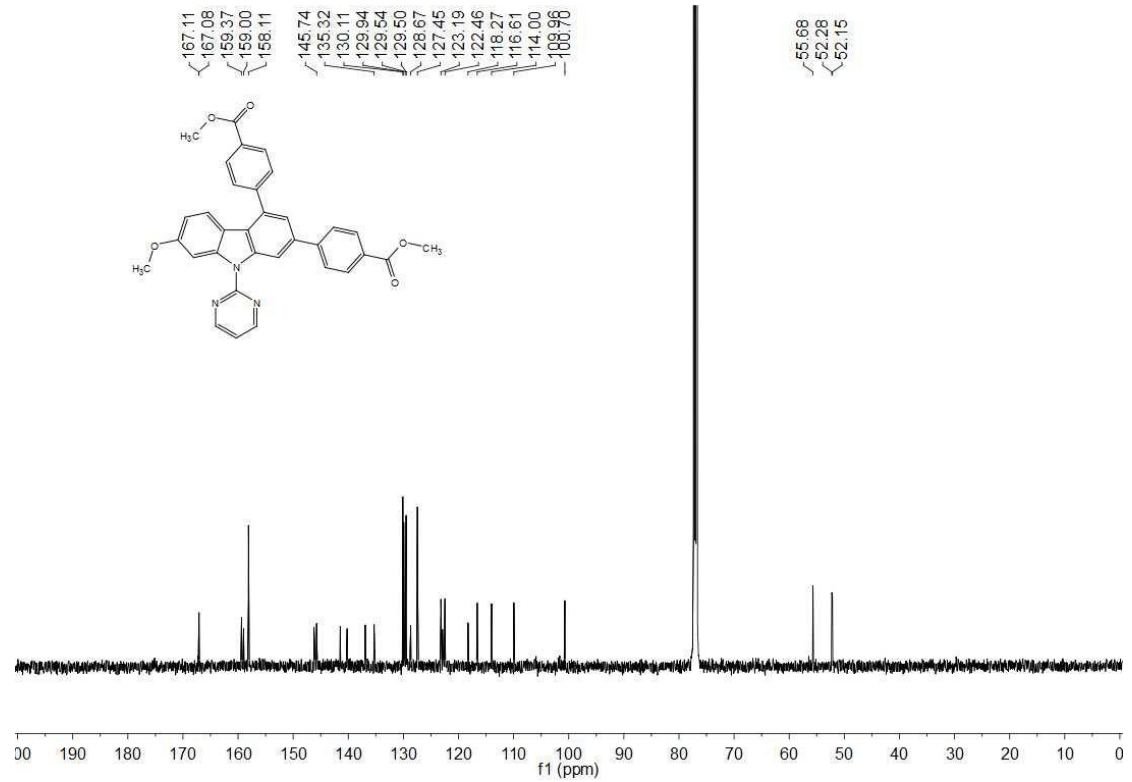

3pa

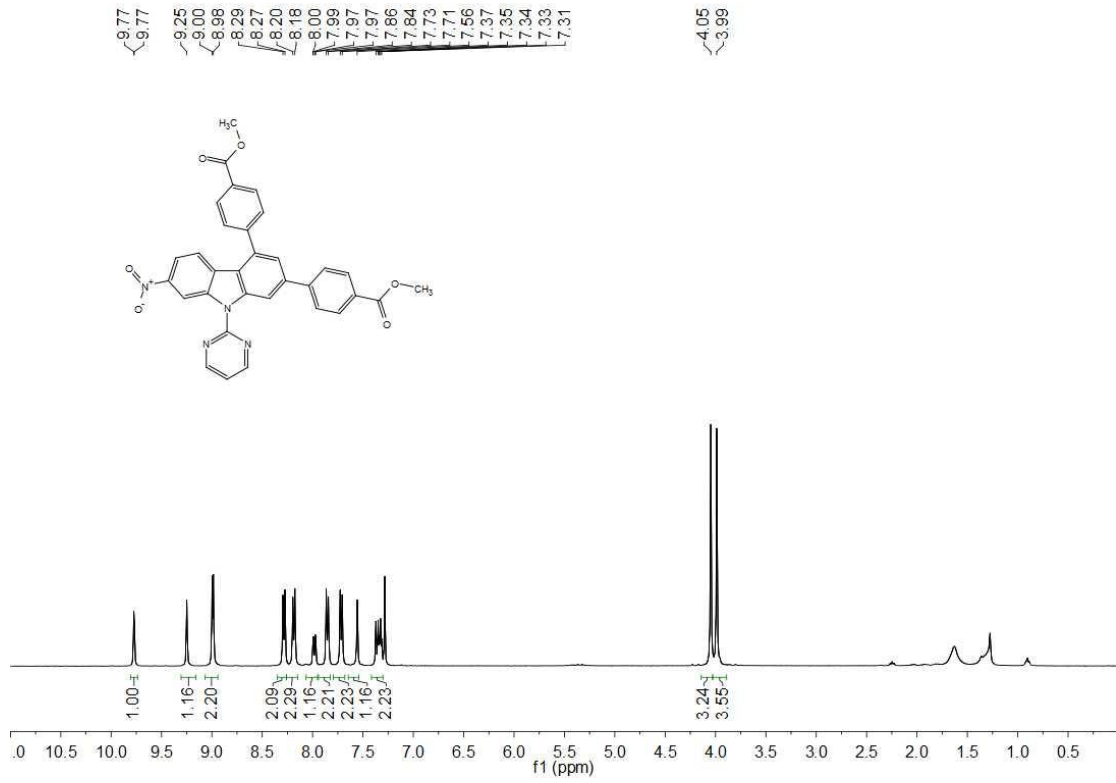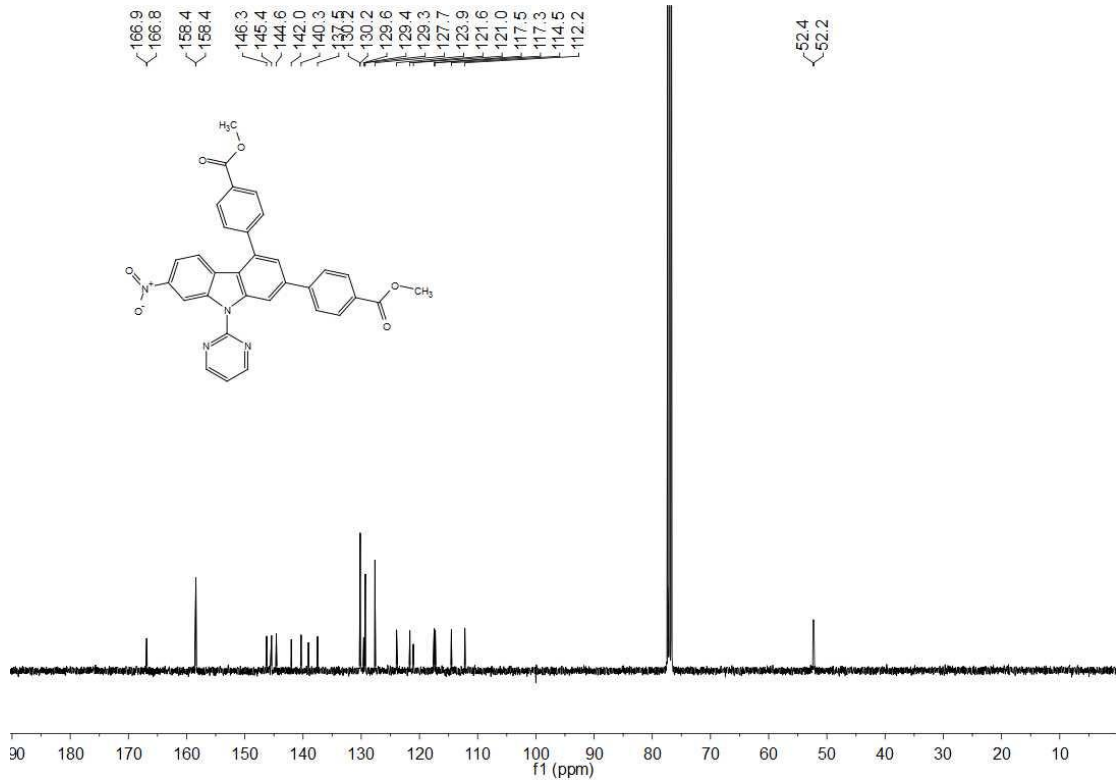



3qa

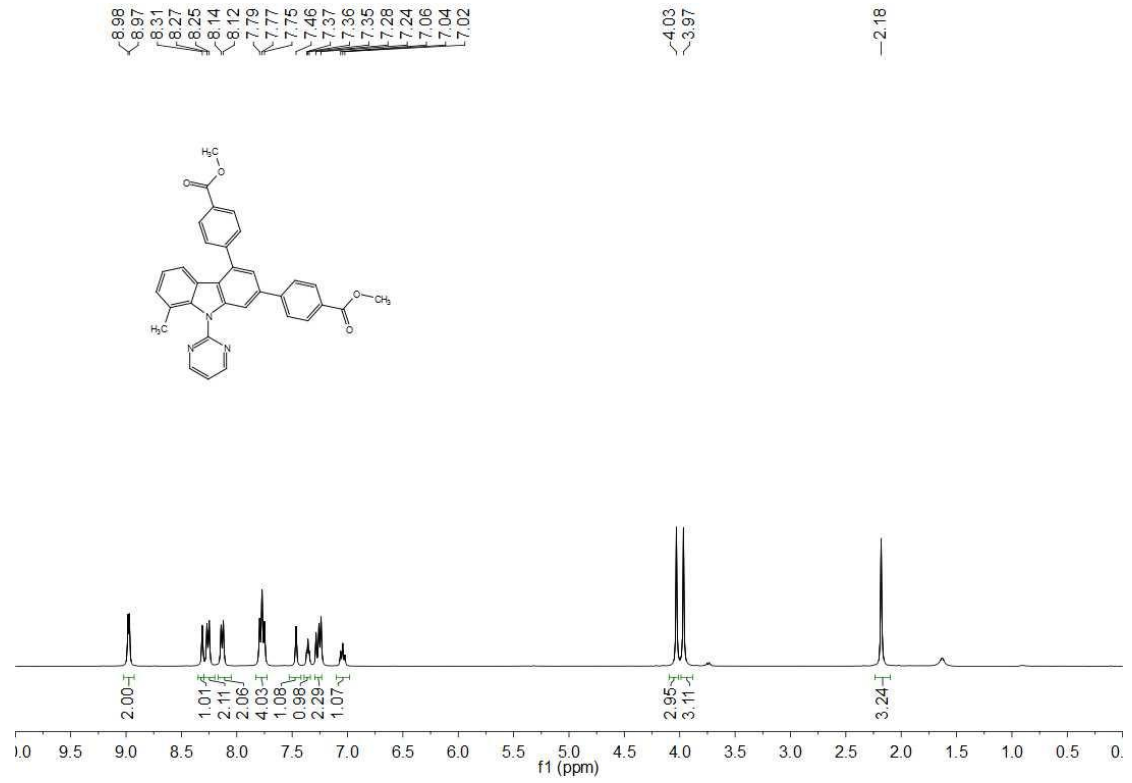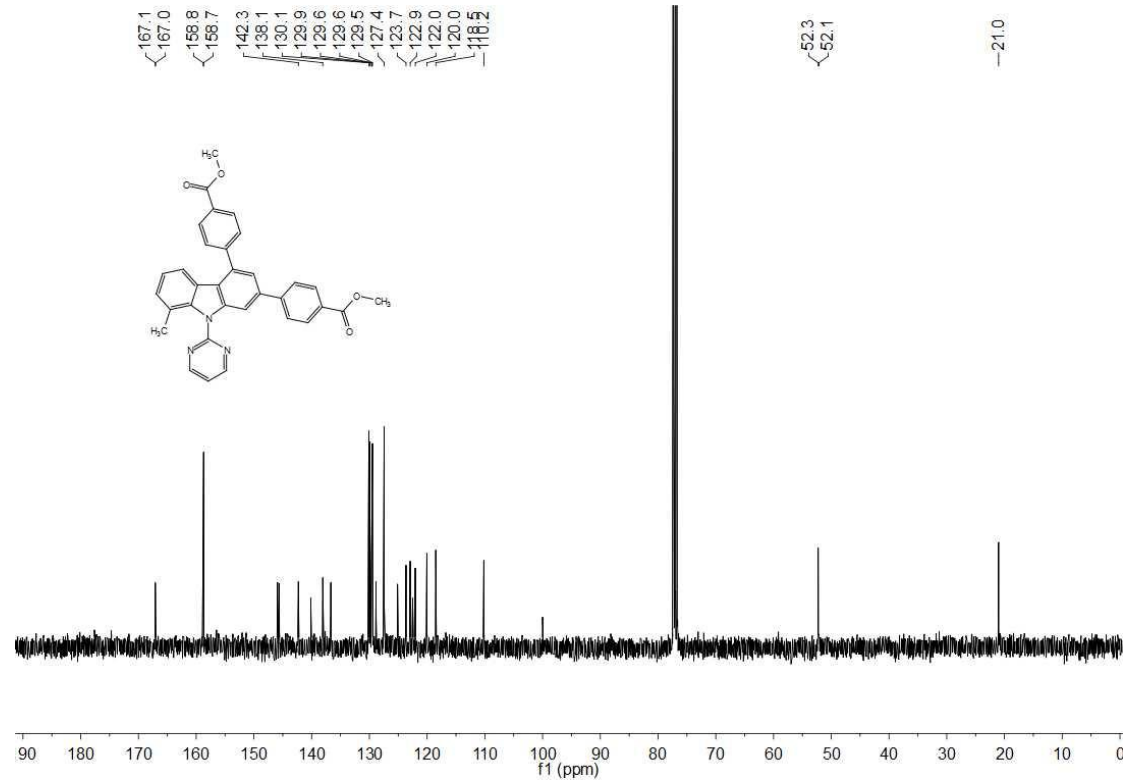

**3ab**

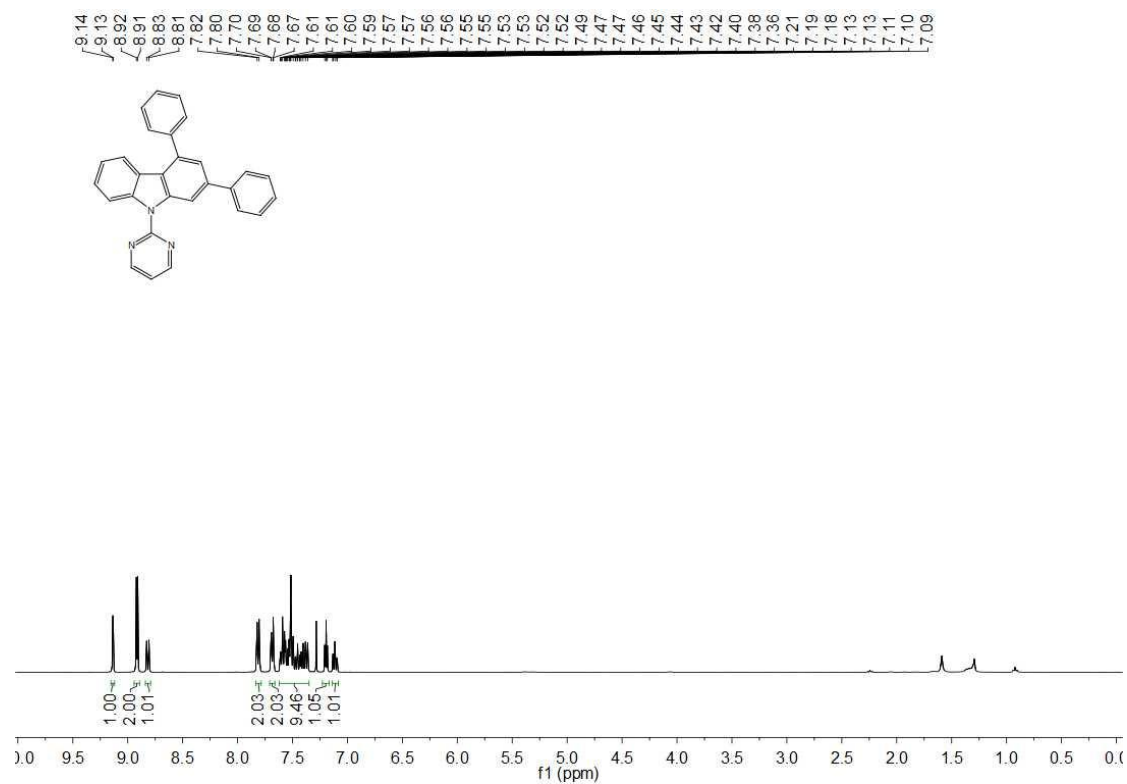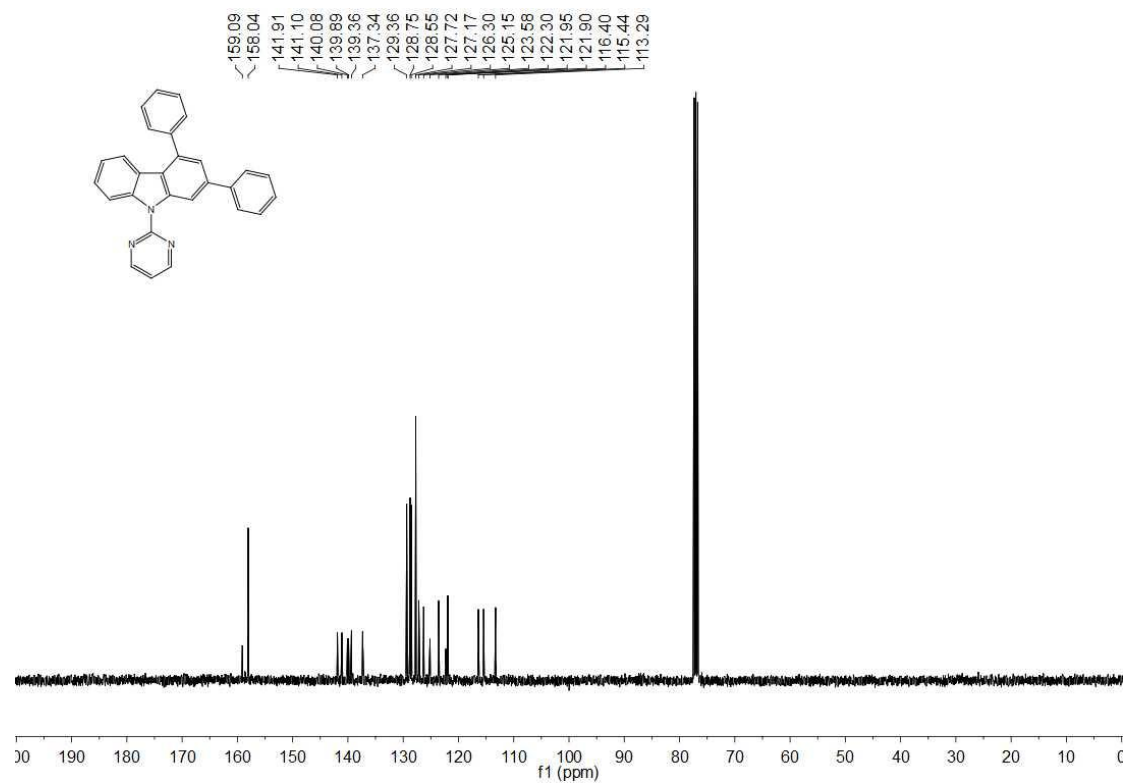

**3ac**

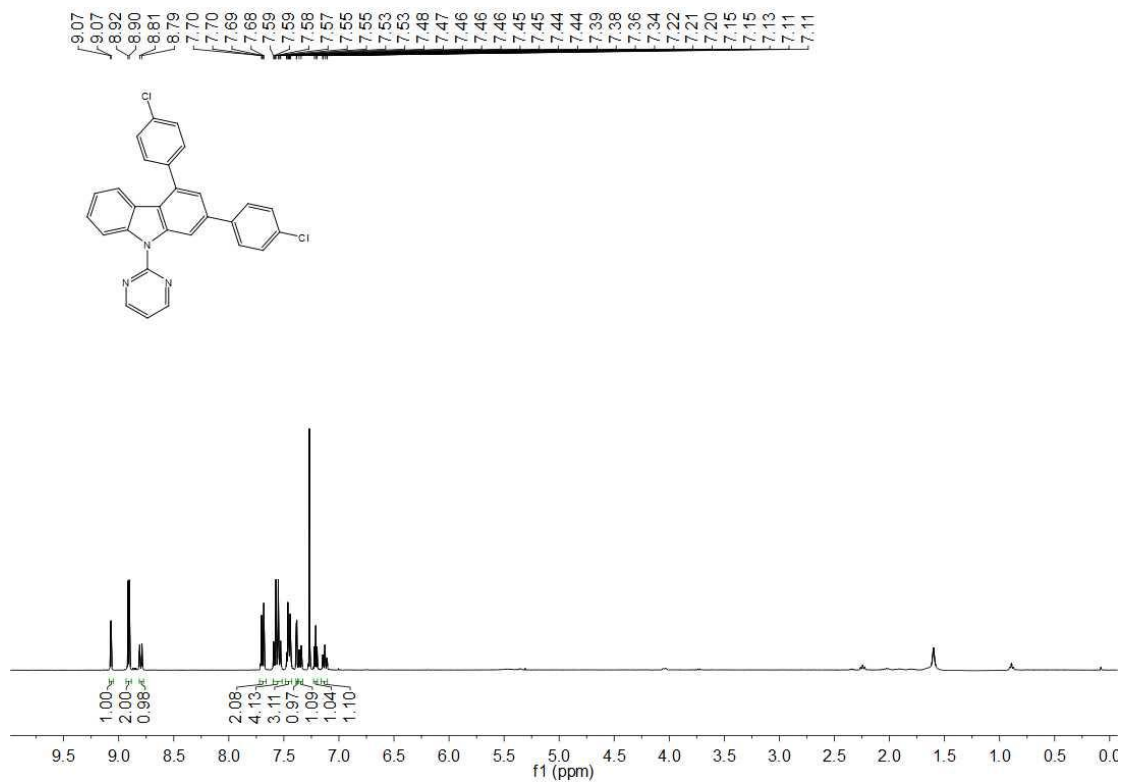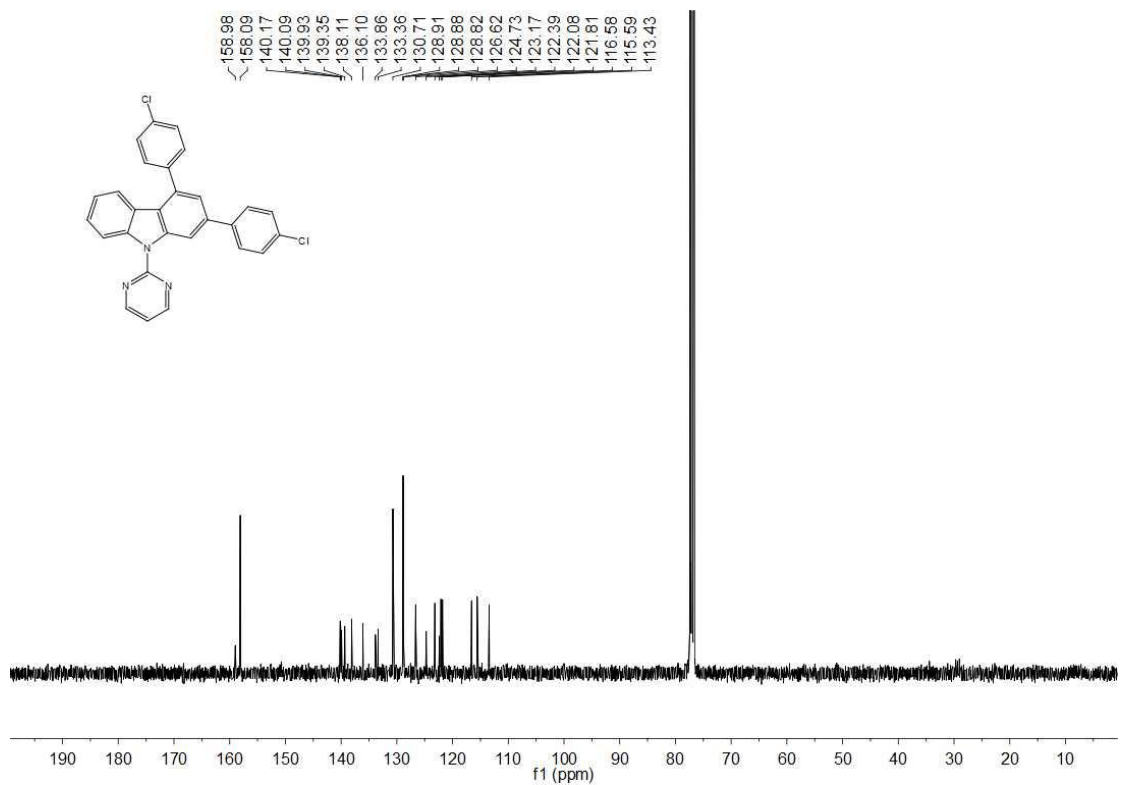

**3ad**

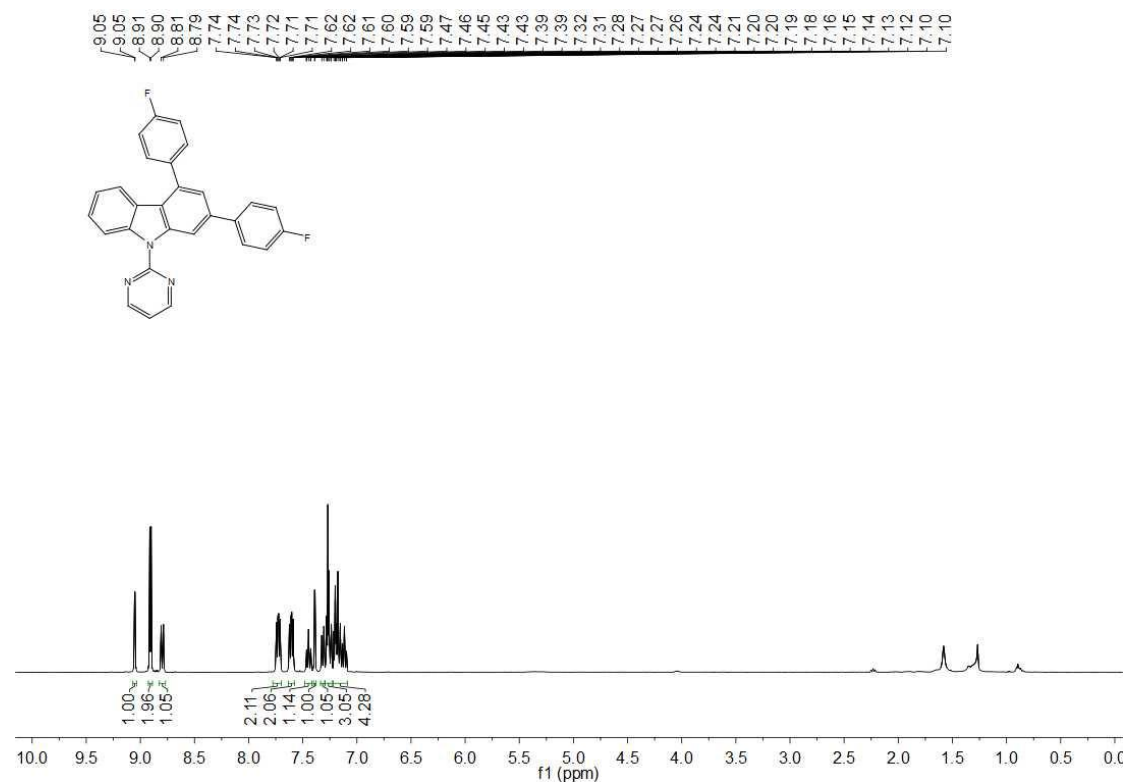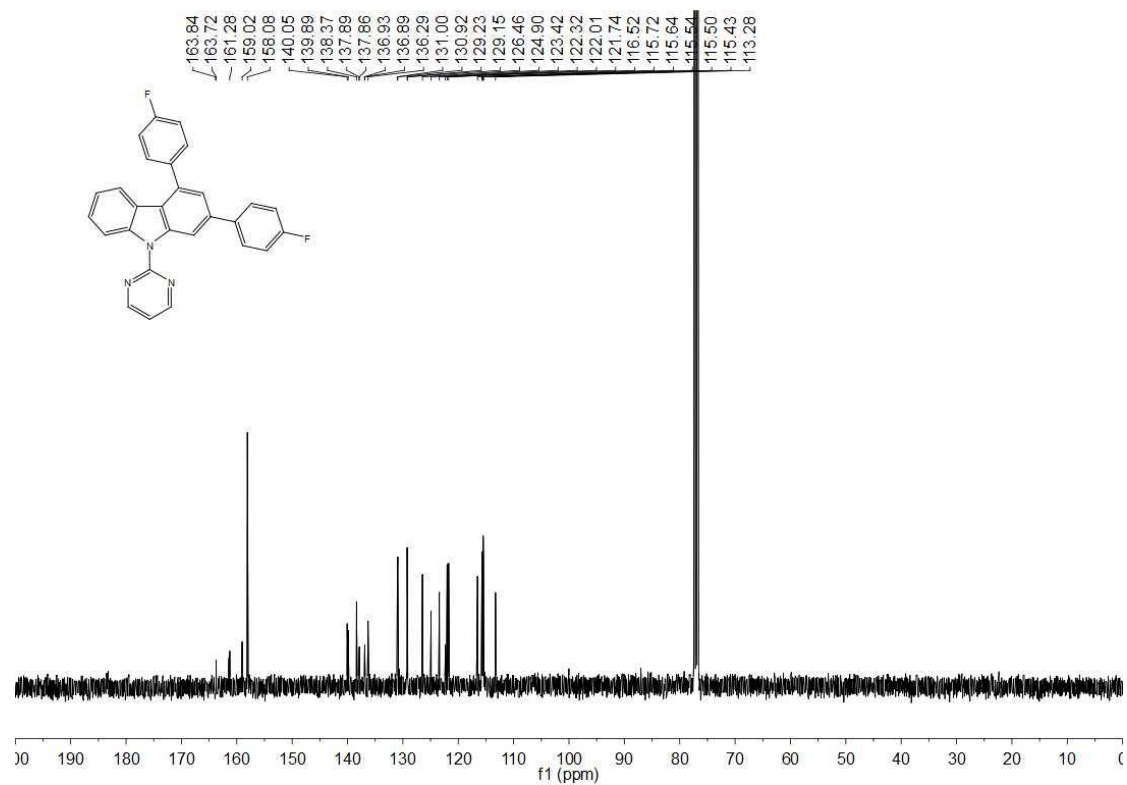

### 3ae

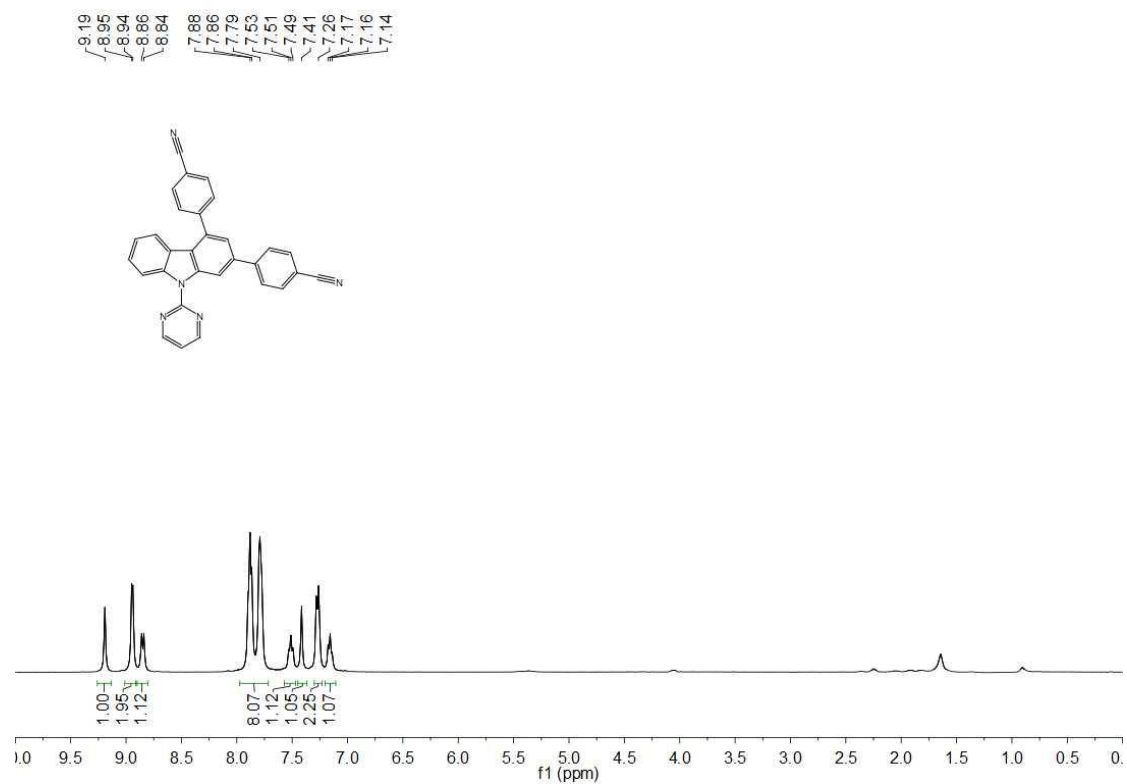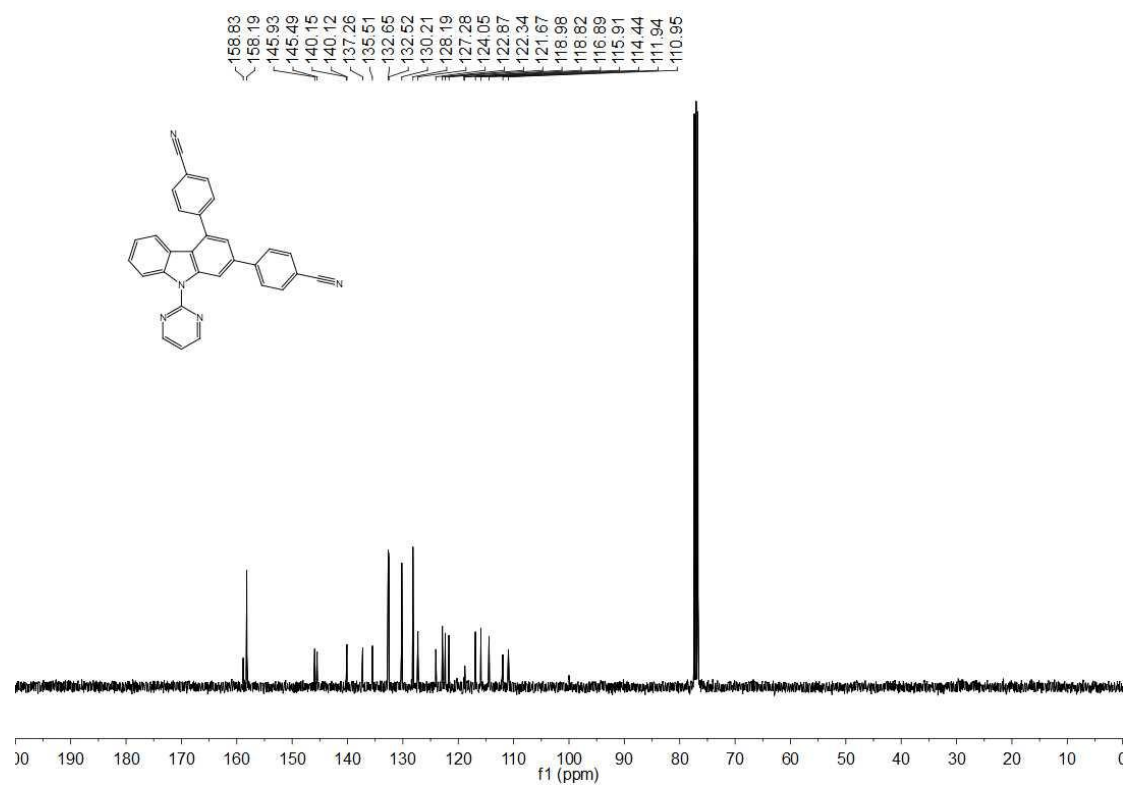

**3af**

9.25  
8.97  
8.95  
8.88  
8.85  
8.46  
8.36  
7.92  
7.87  
7.85  
7.55  
7.53  
7.51  
7.48  
7.31  
7.28  
7.27  
7.18  
7.16  
7.14

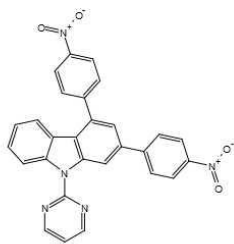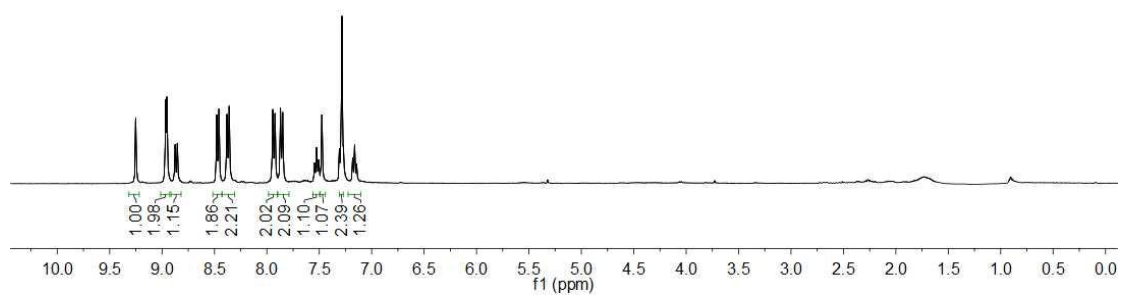

158.62  
158.22  
147.85  
147.75  
147.40  
147.13  
140.22  
140.13  
136.66  
135.16  
130.39  
128.25  
127.44  
124.19  
124.00  
123.85  
123.05  
122.96  
122.41  
121.71  
116.96  
115.97  
114.80

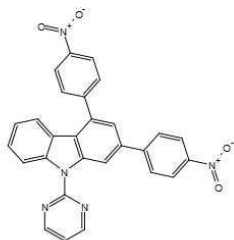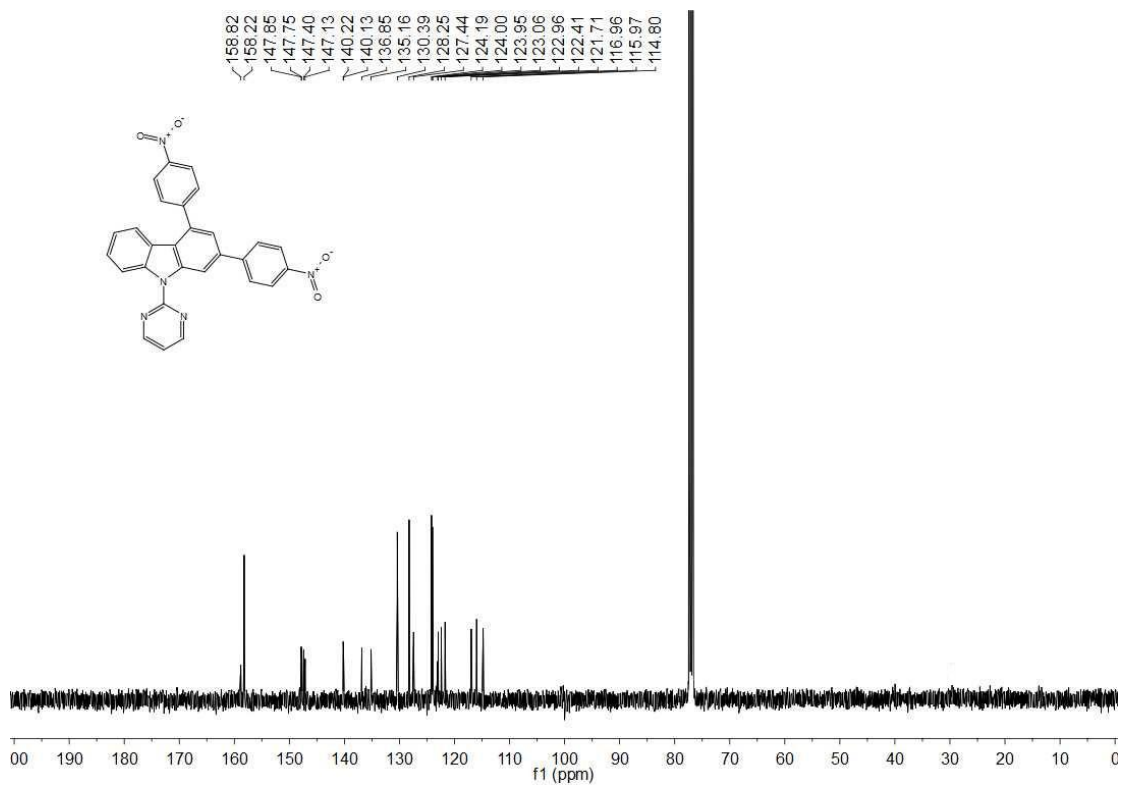

**3ag**

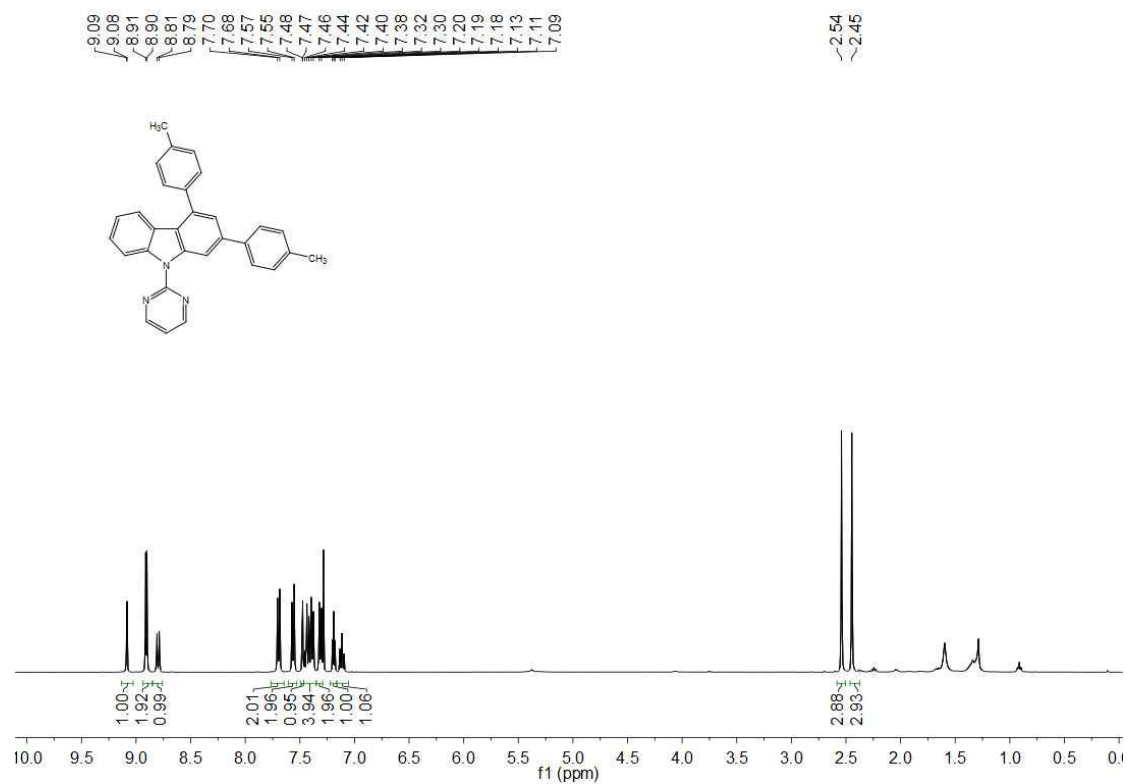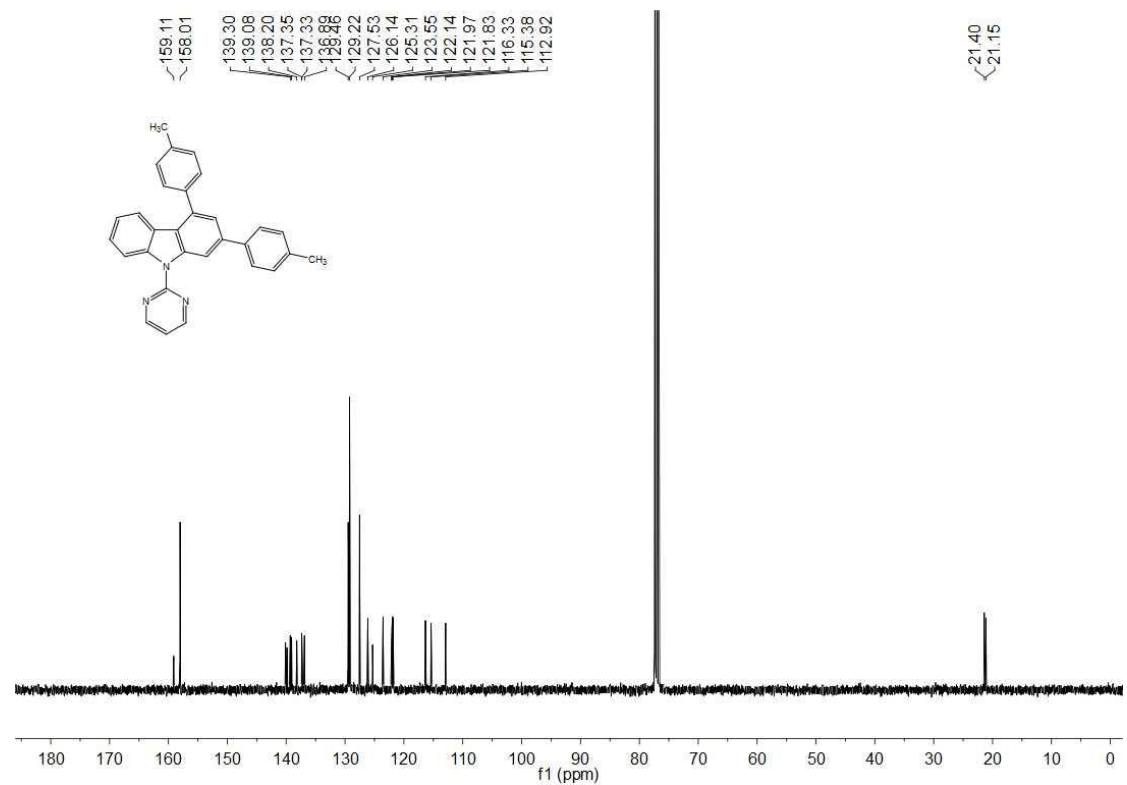

**3ah**

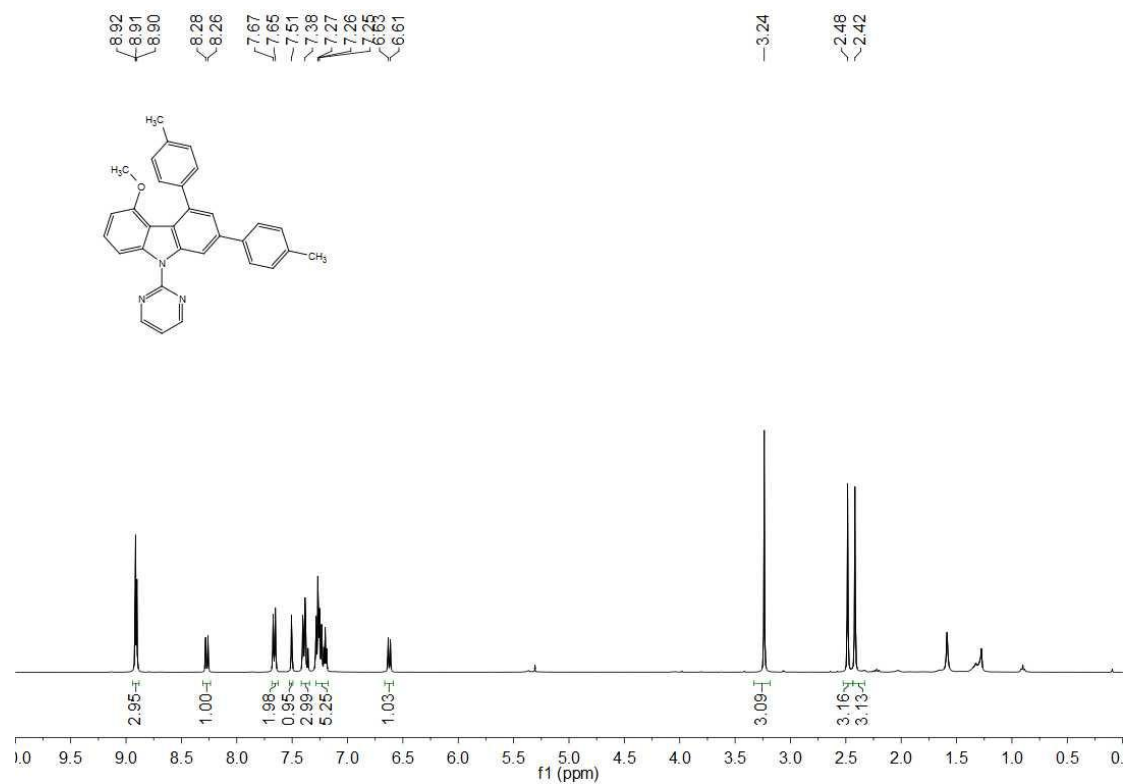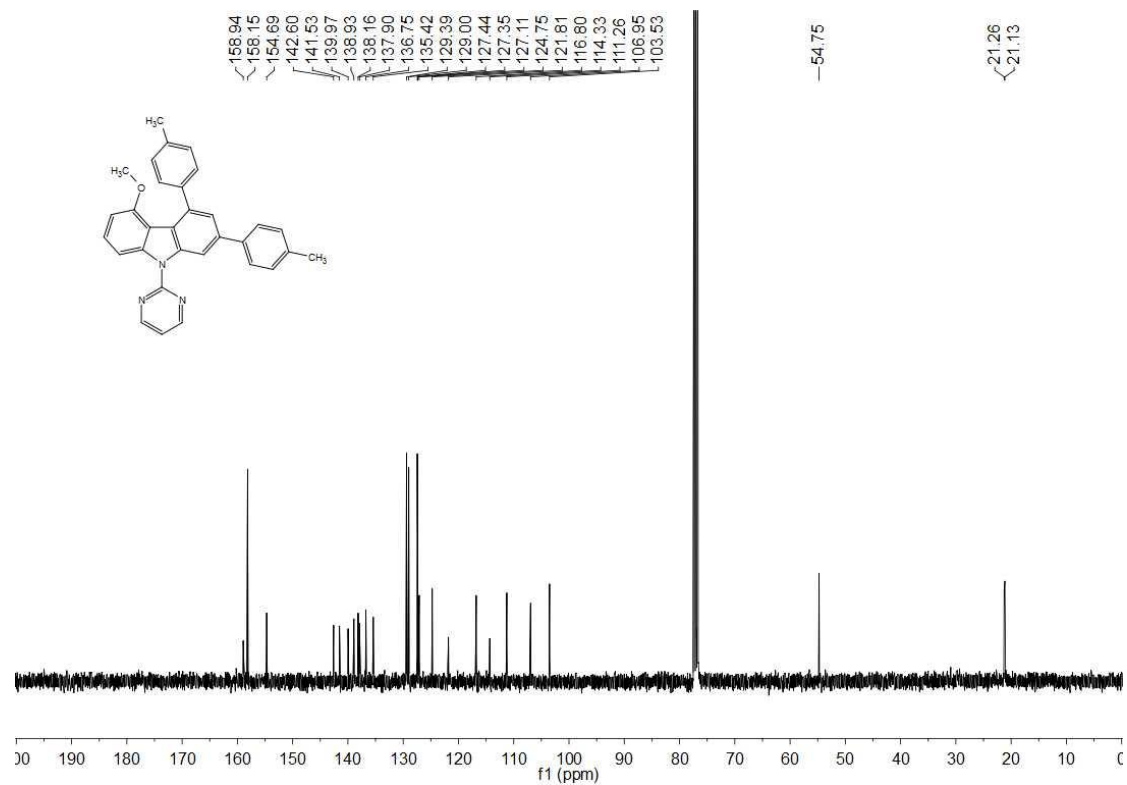



**3ai**

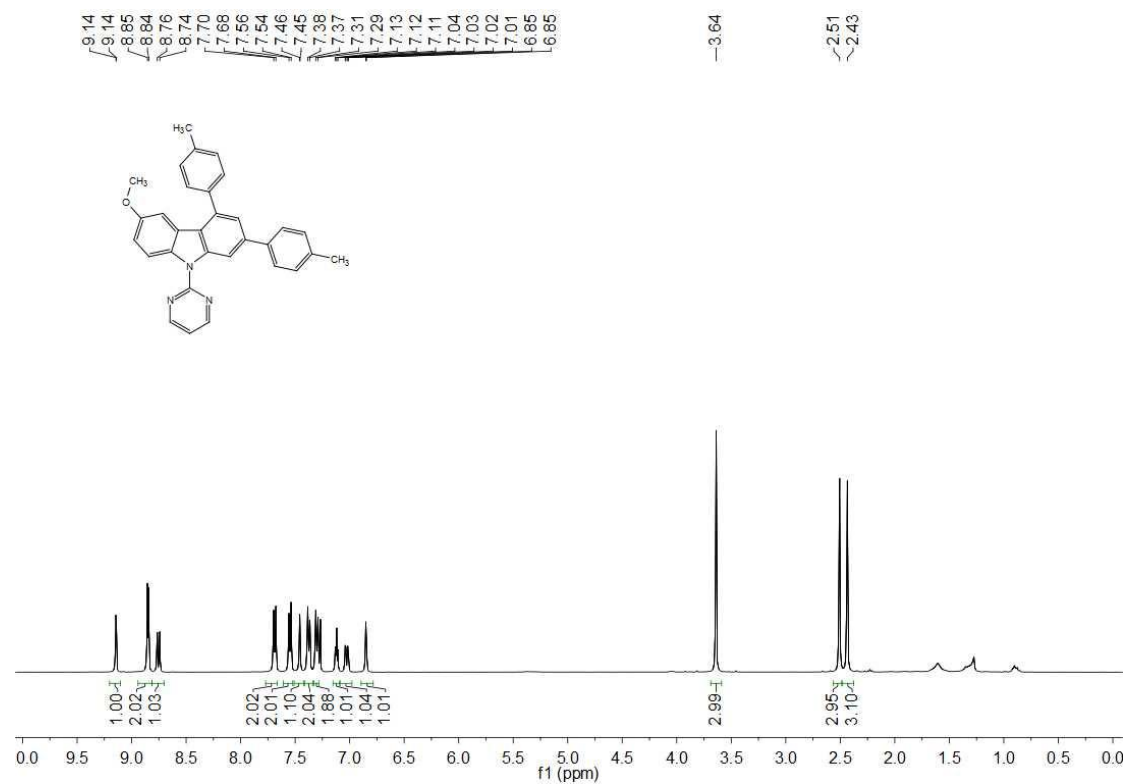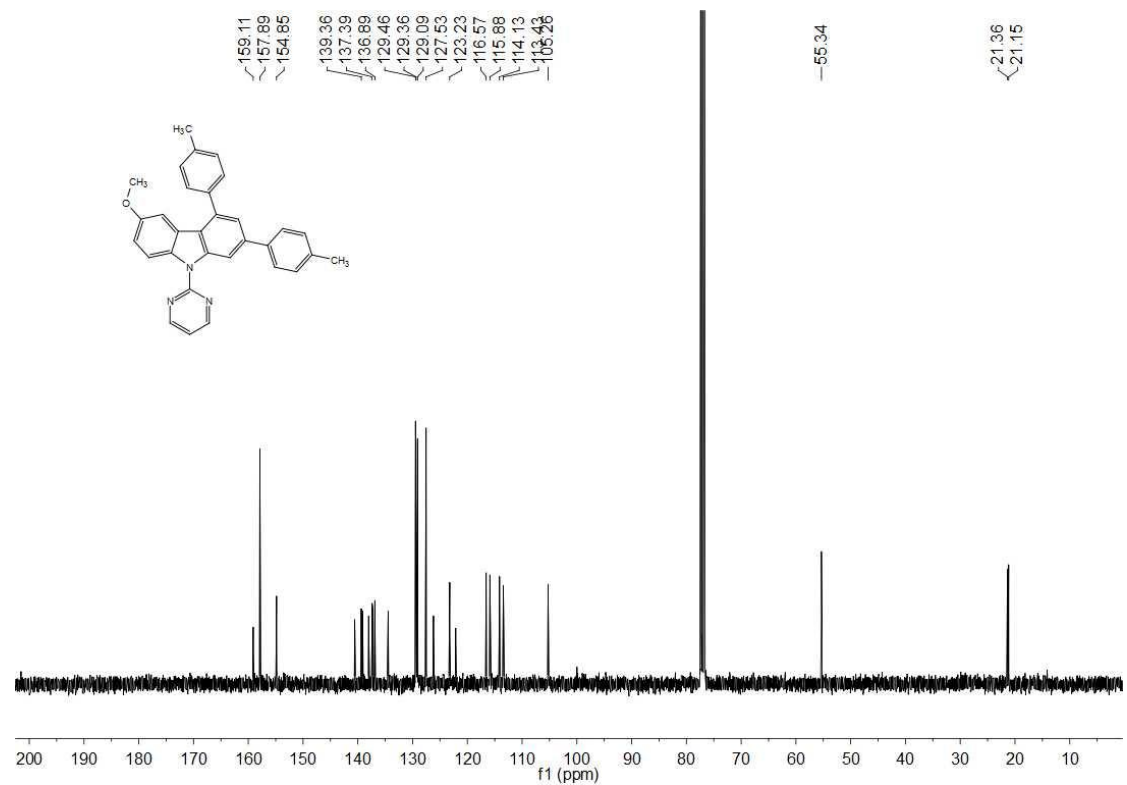

3aj

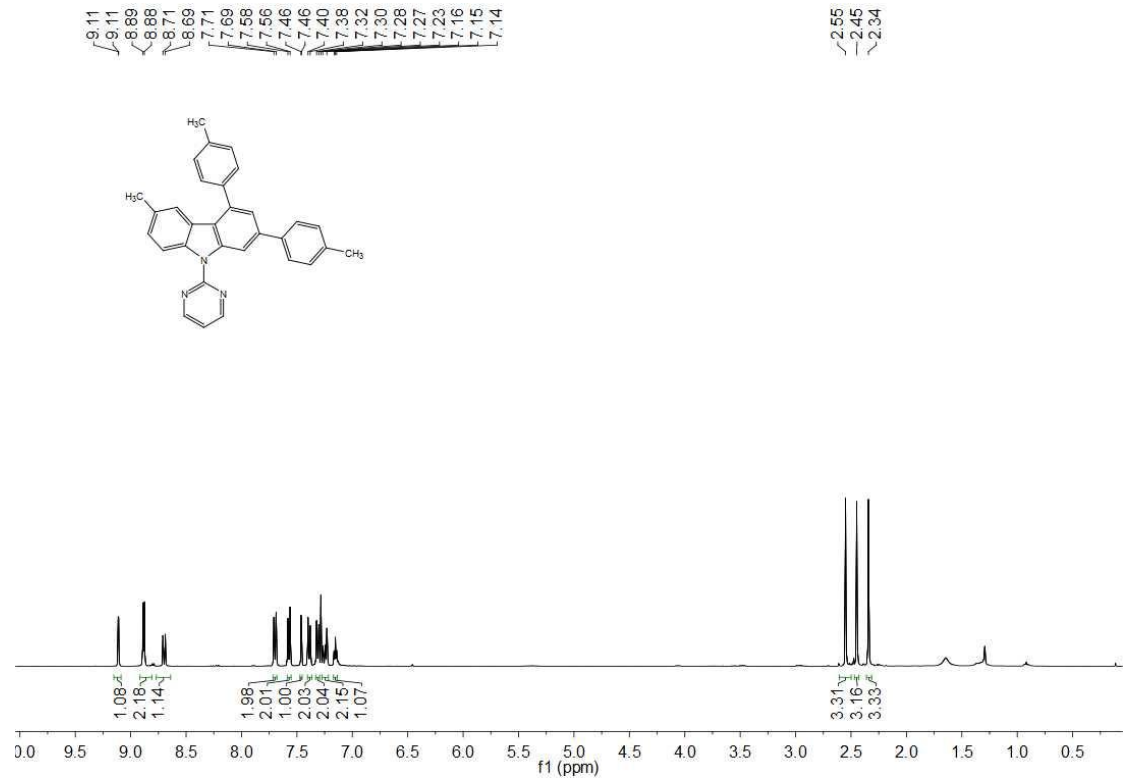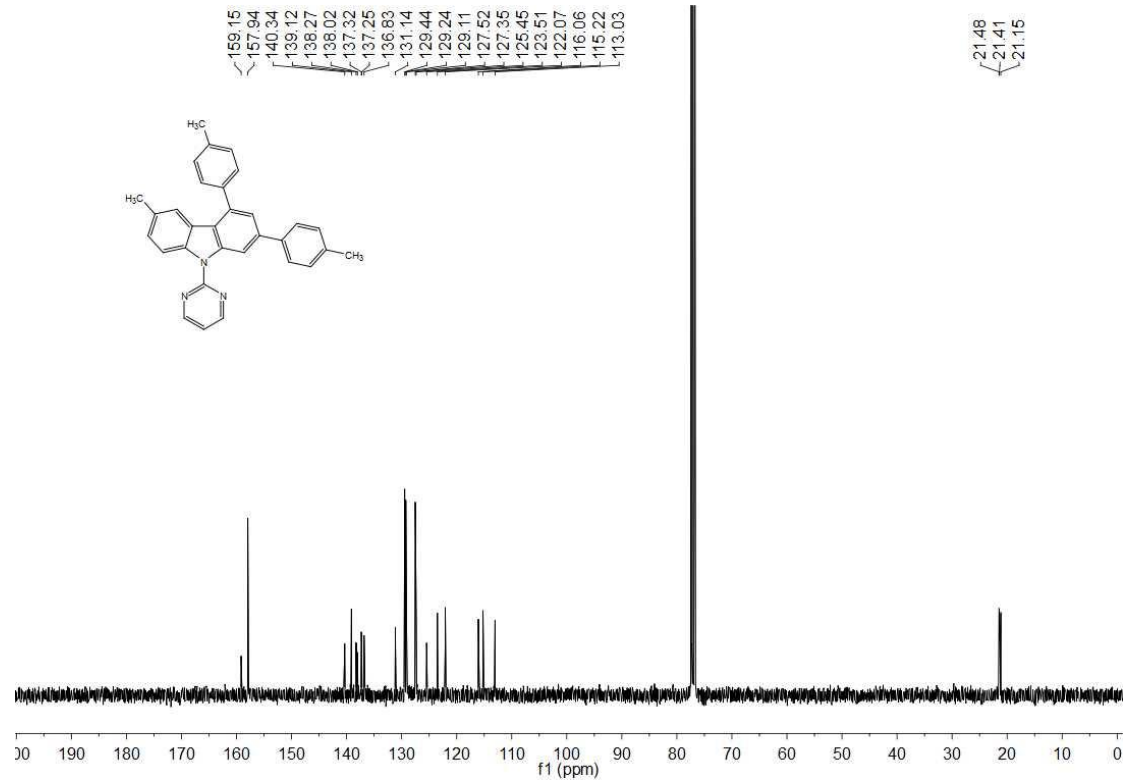

**3ak**

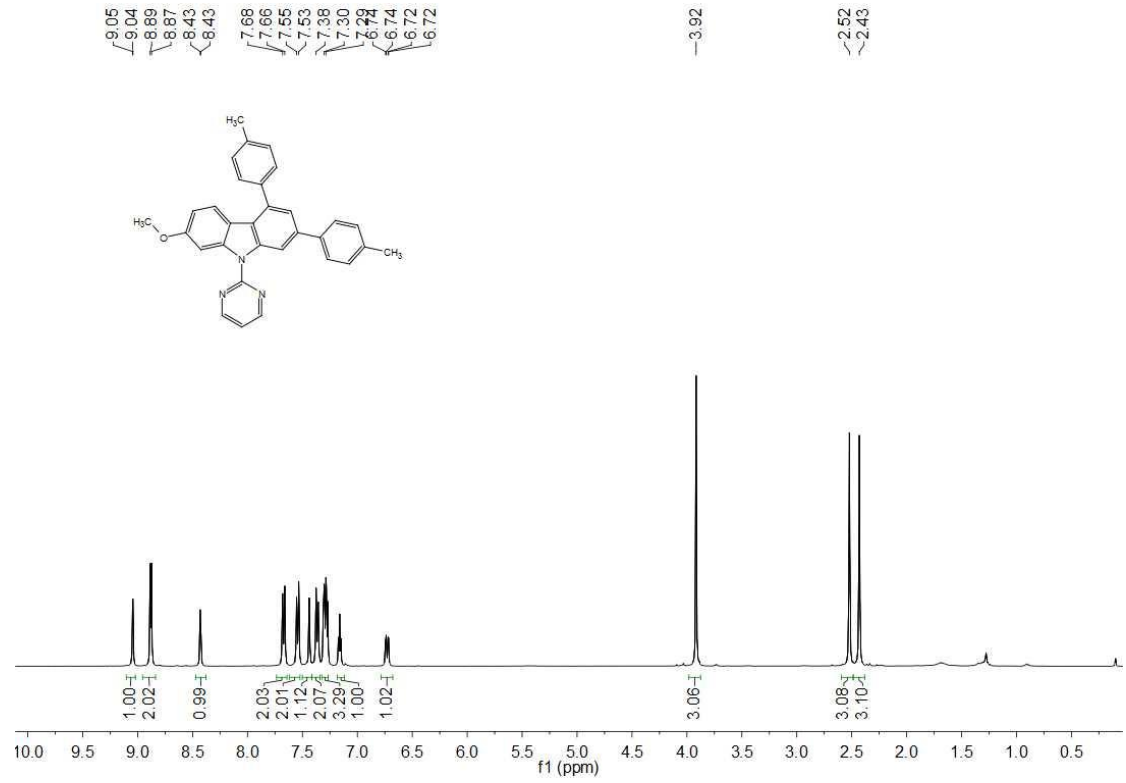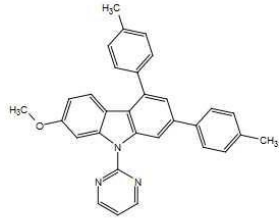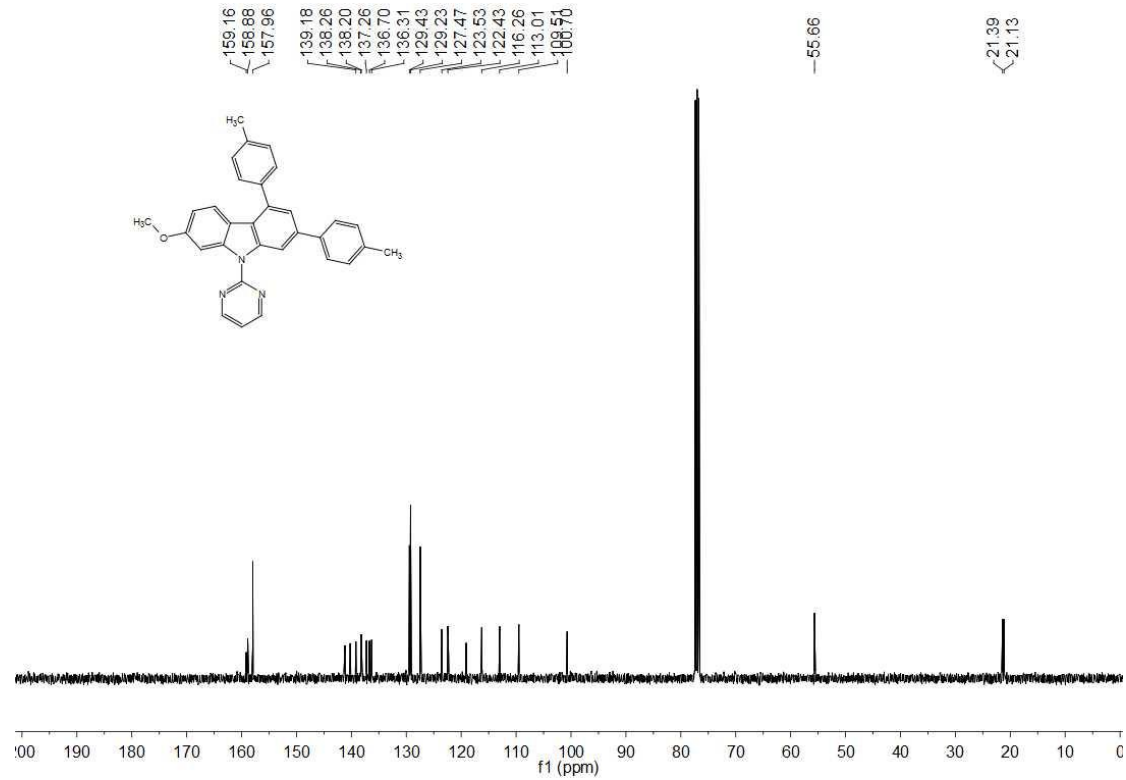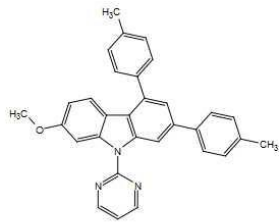

**3al**

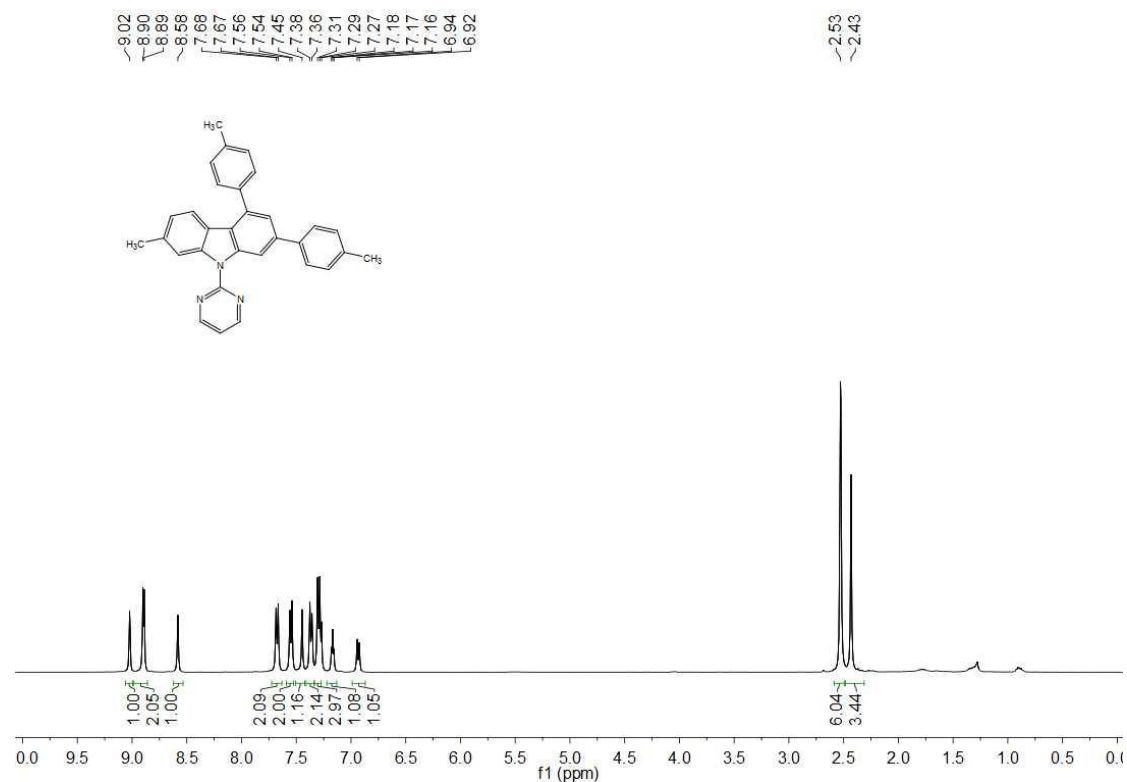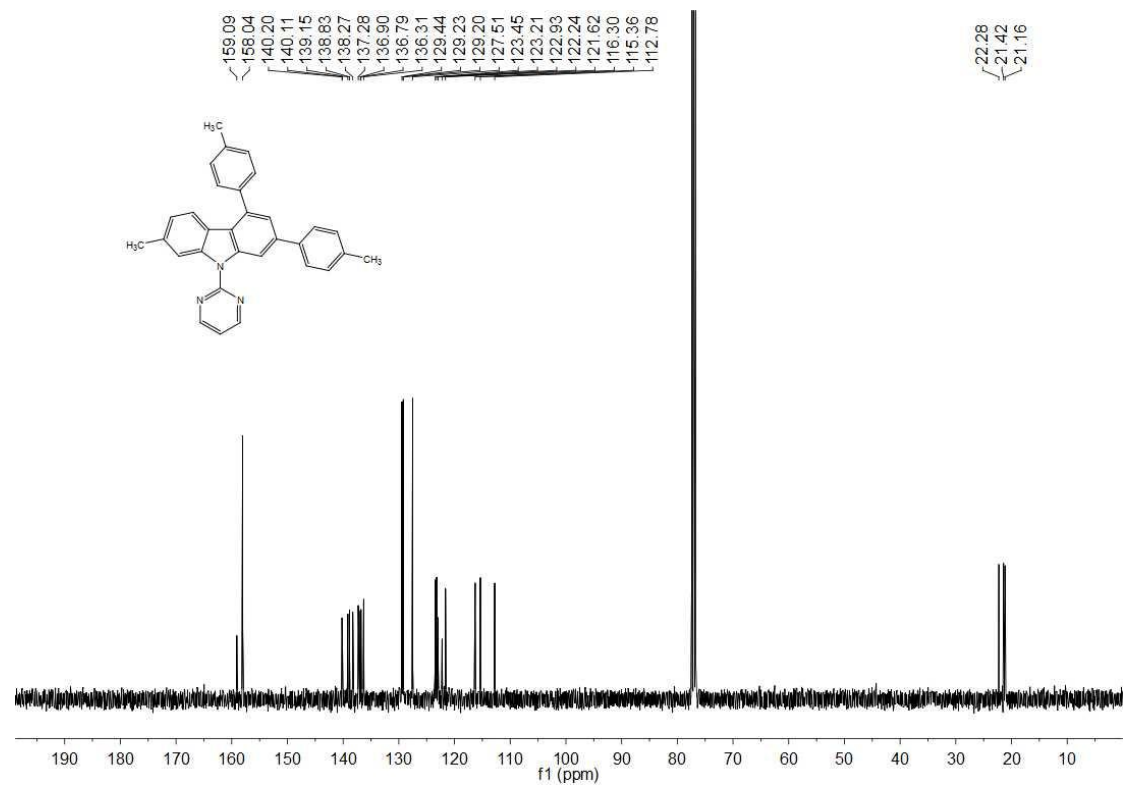

**3am**

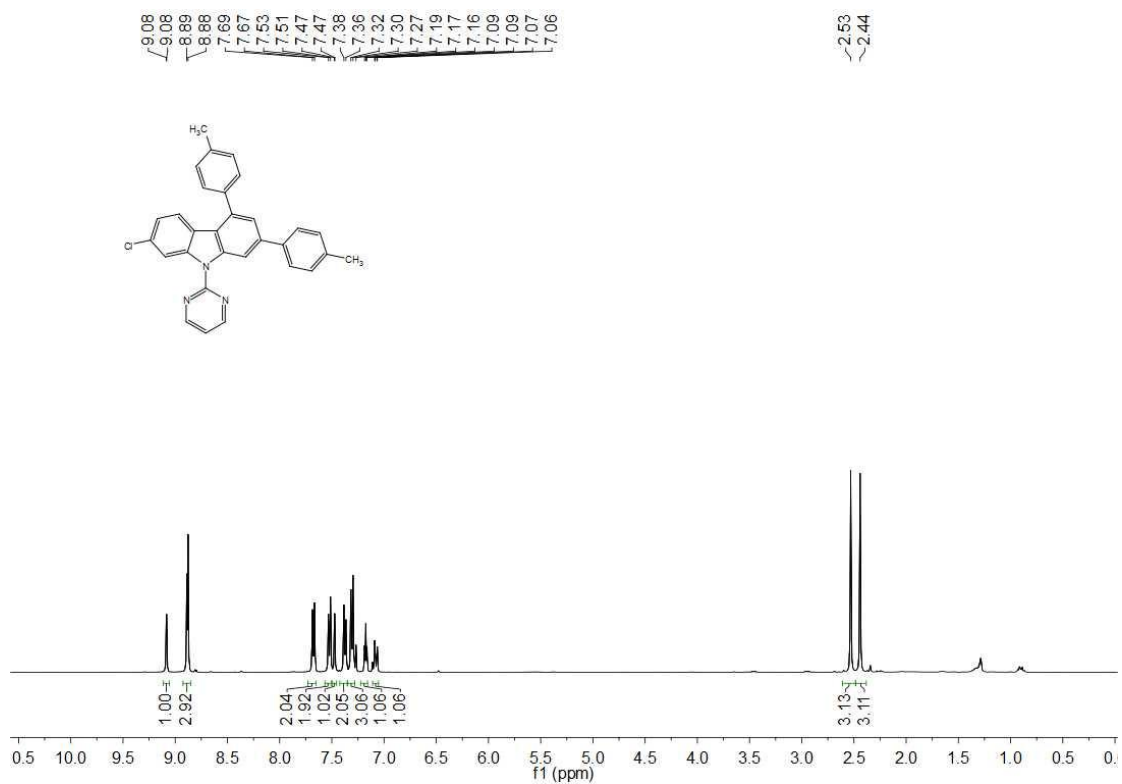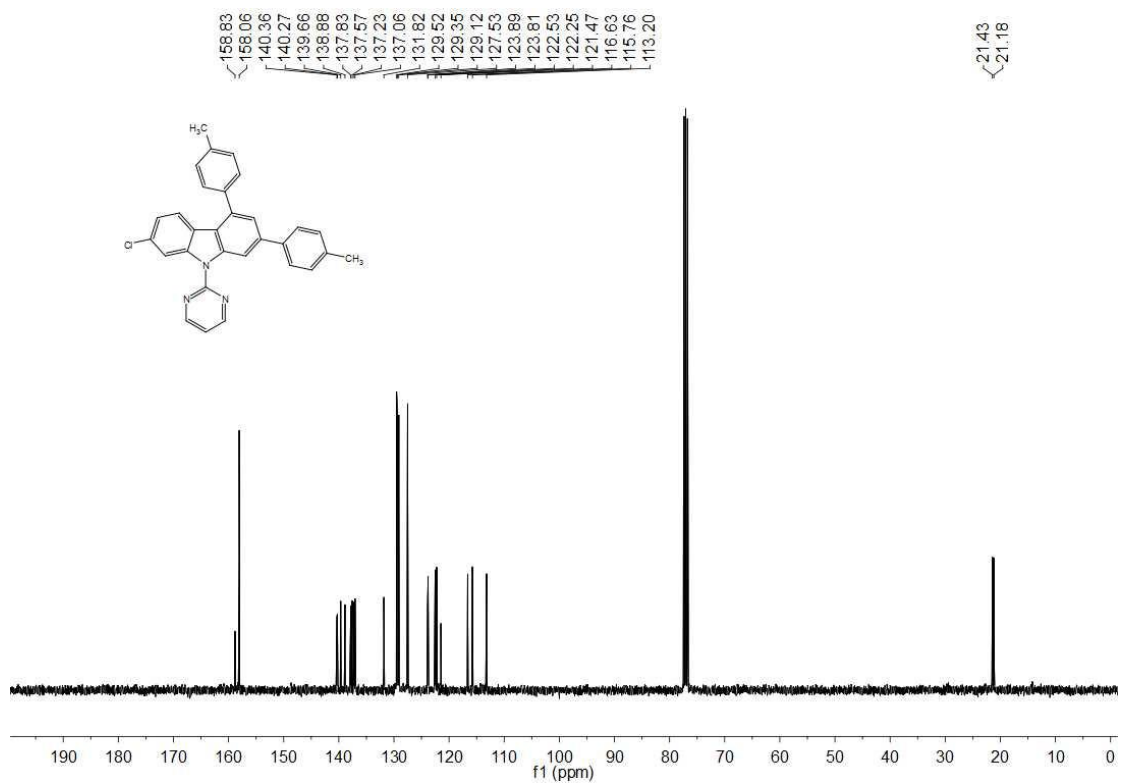

### 3an

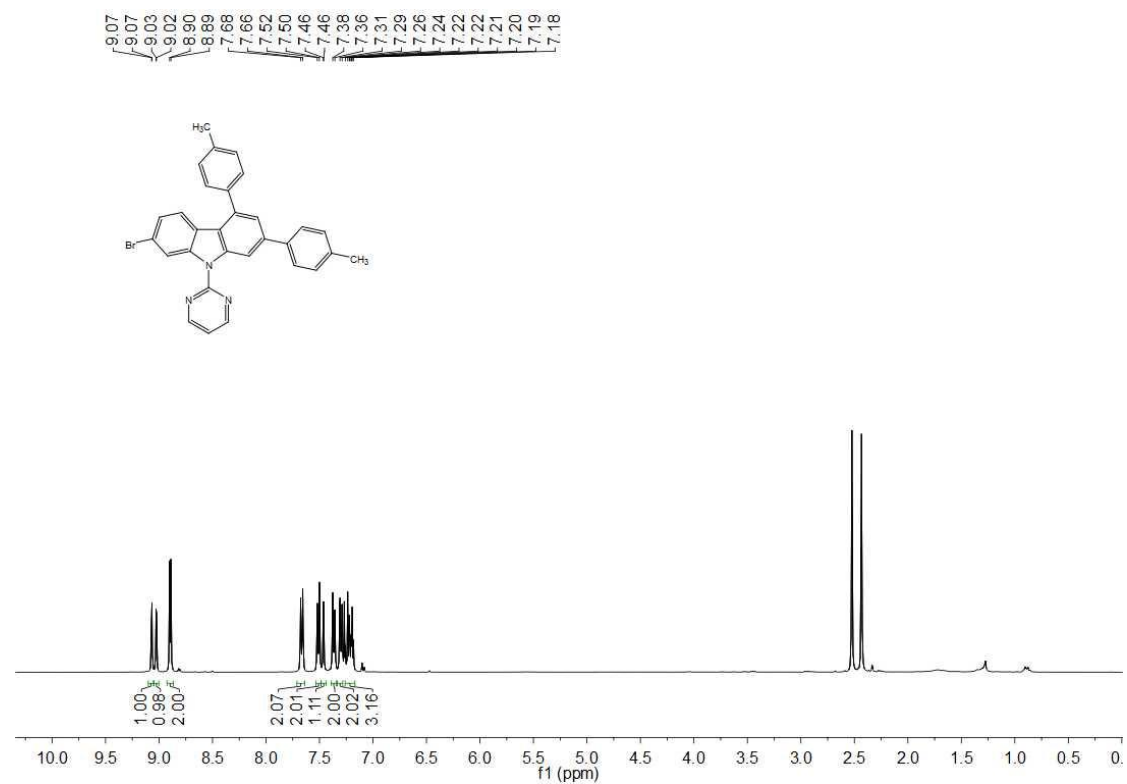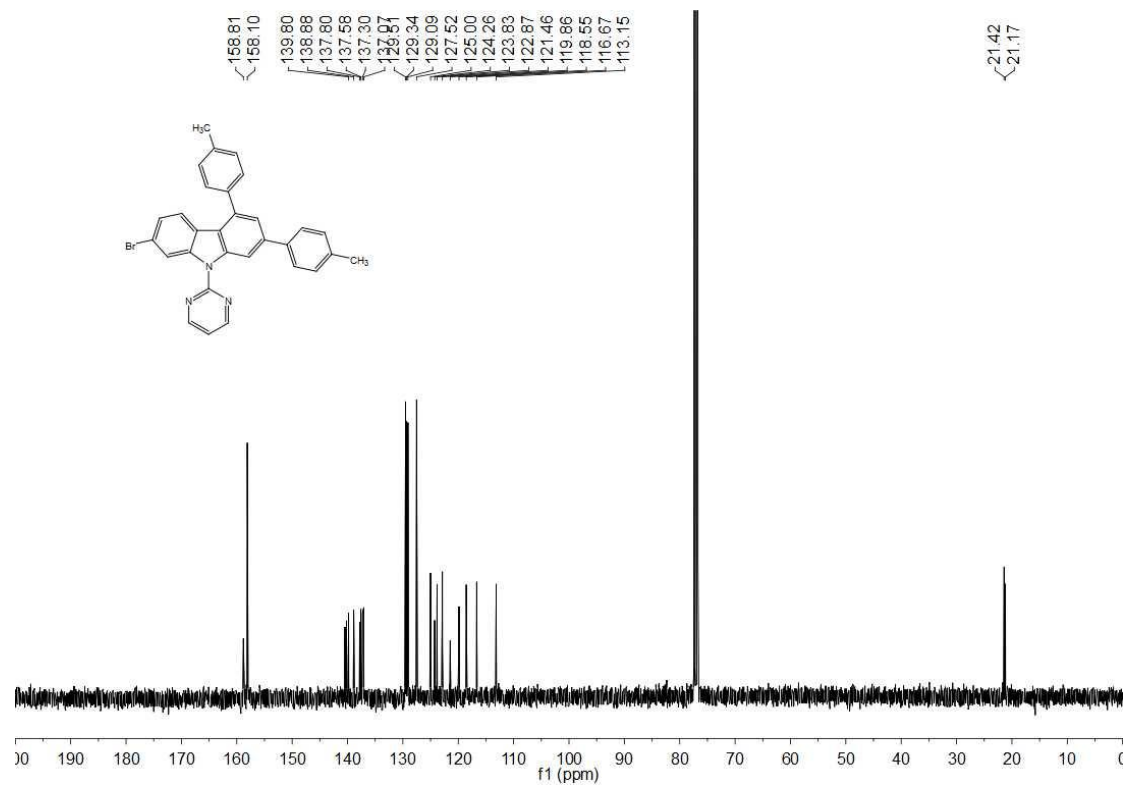

**3ao**

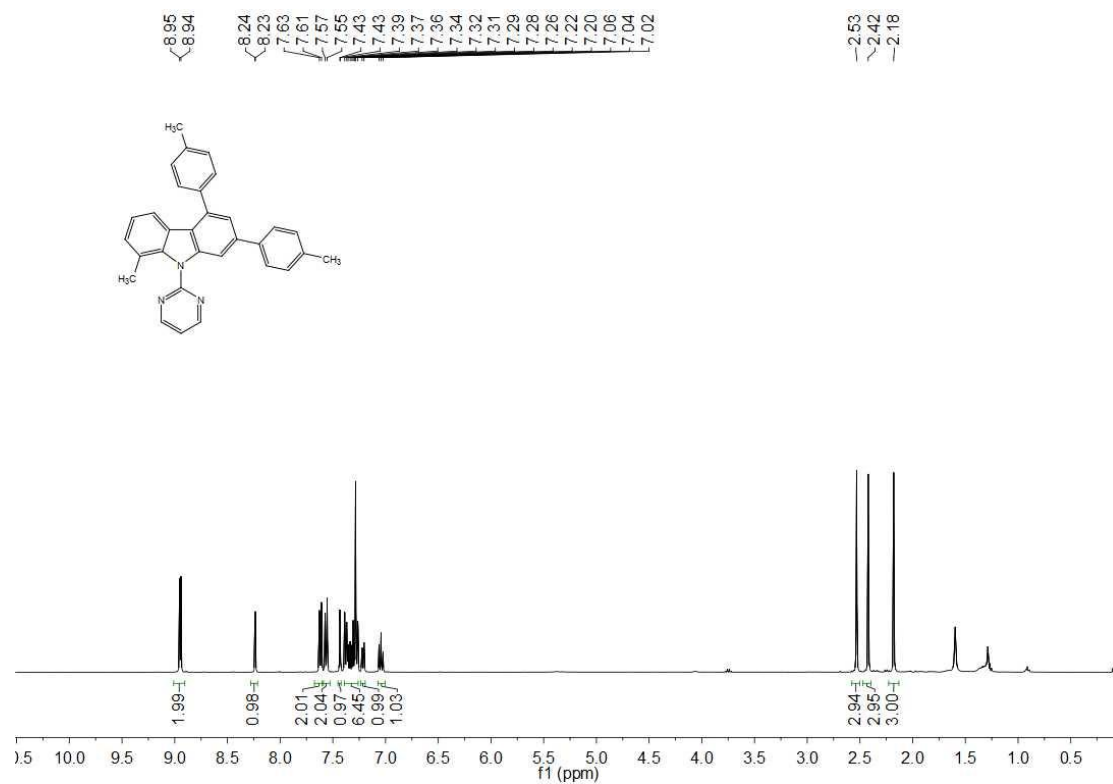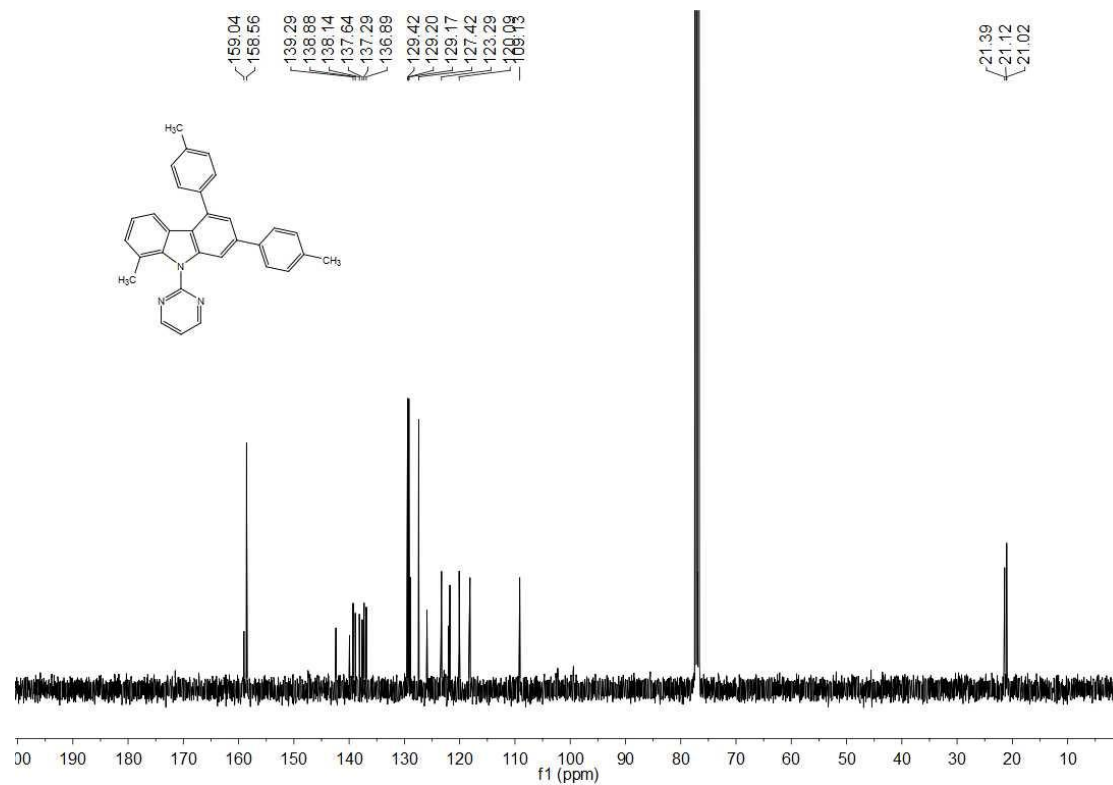

### 3ap

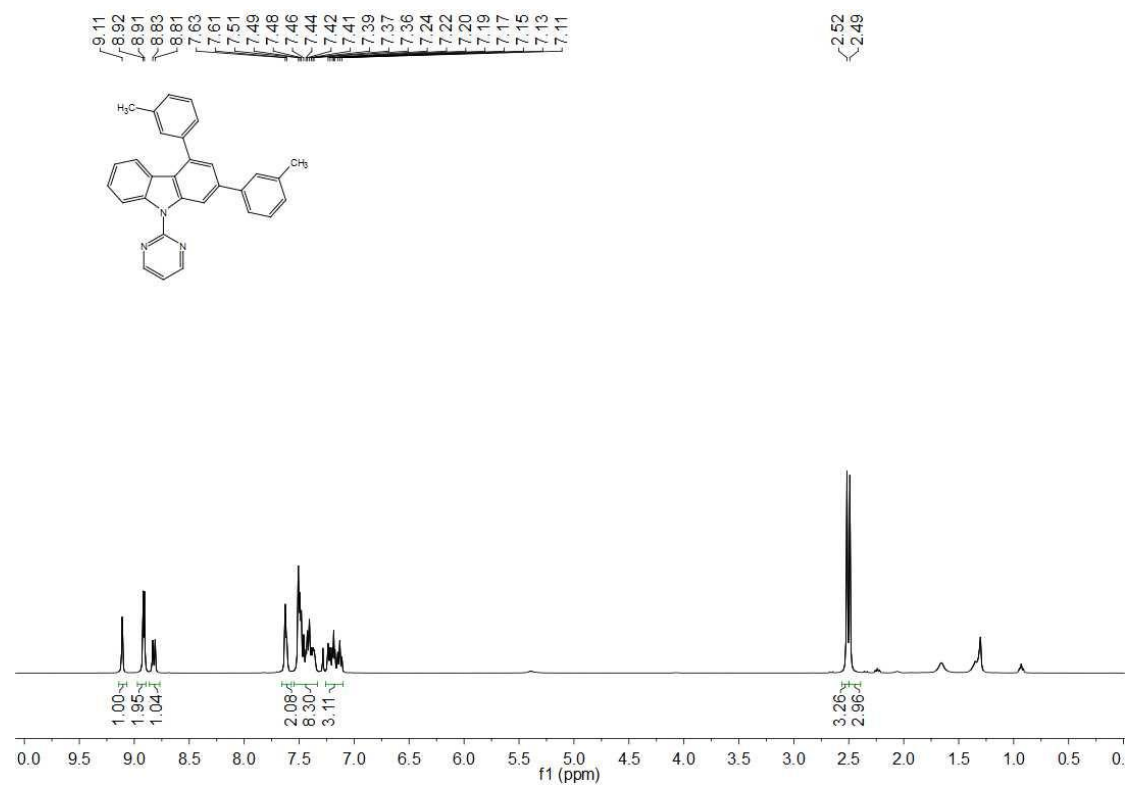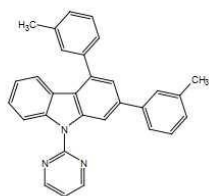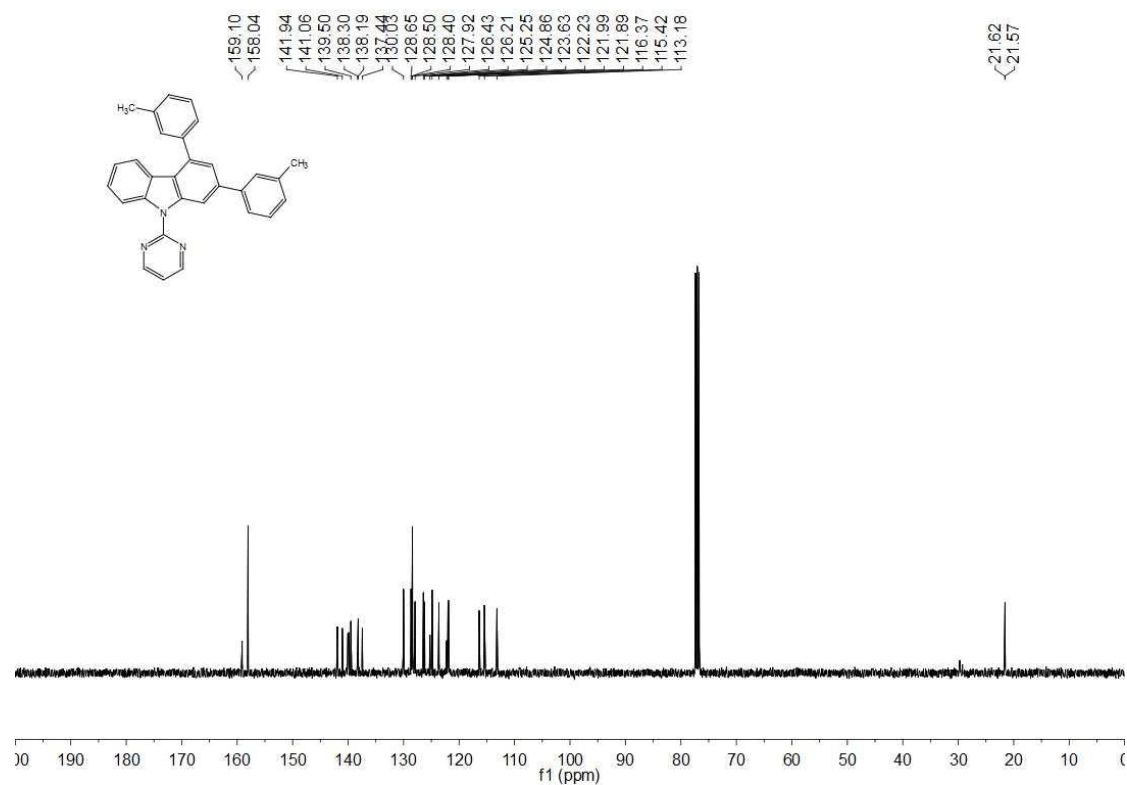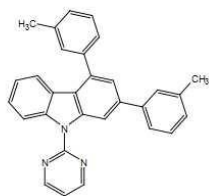



**3aq**

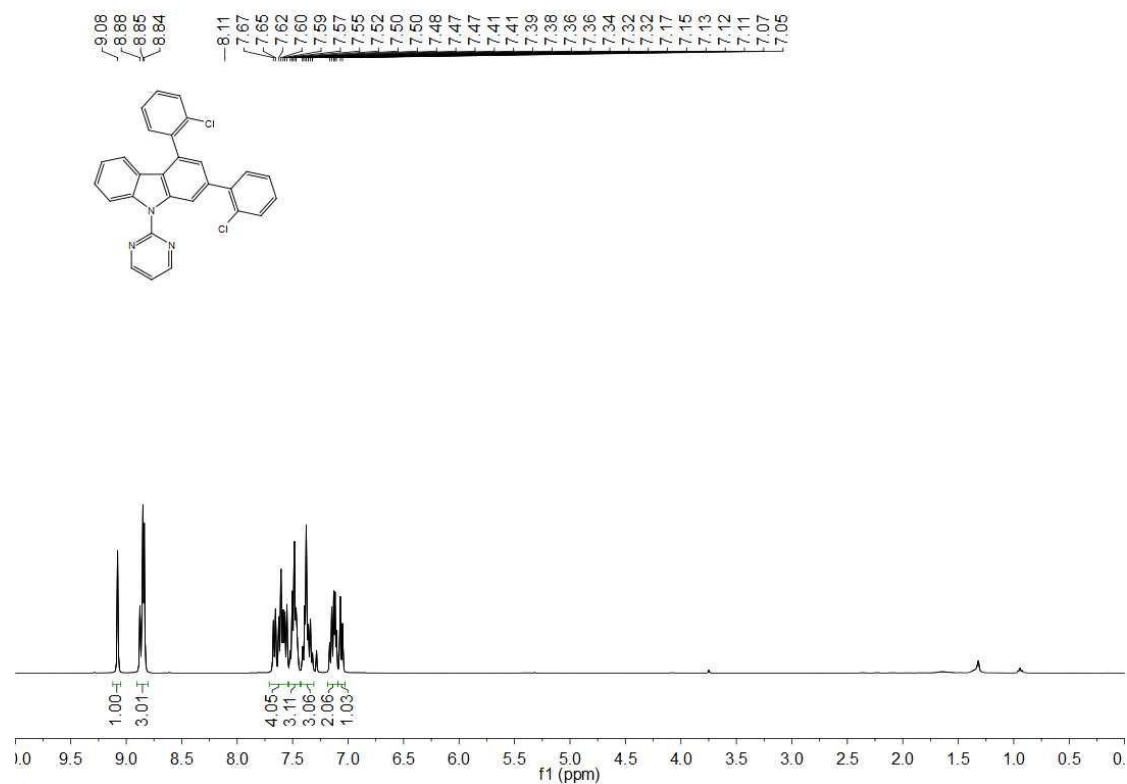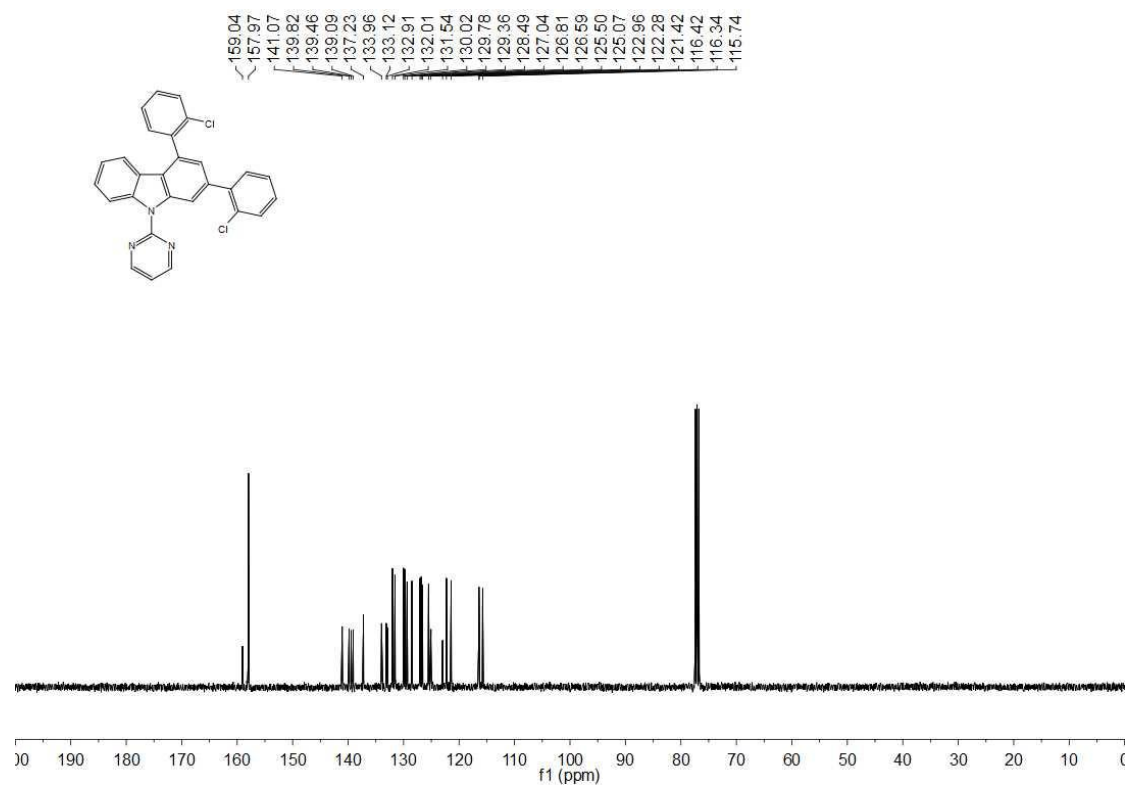

### 3ar

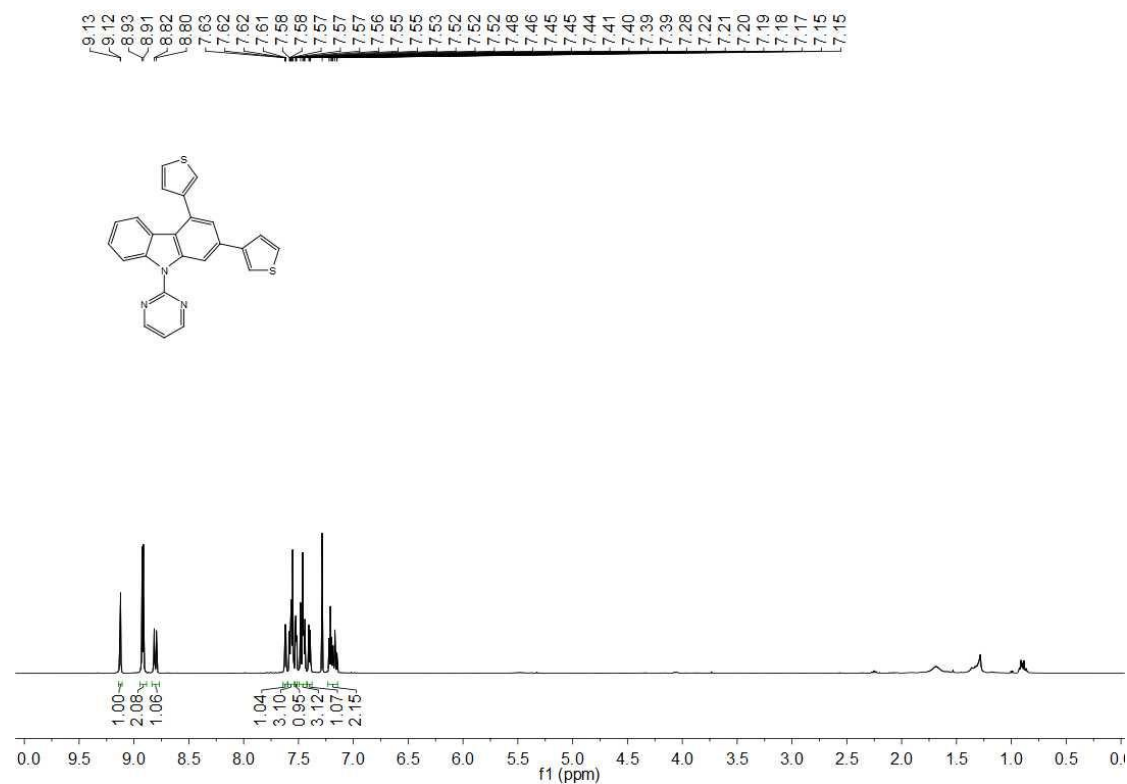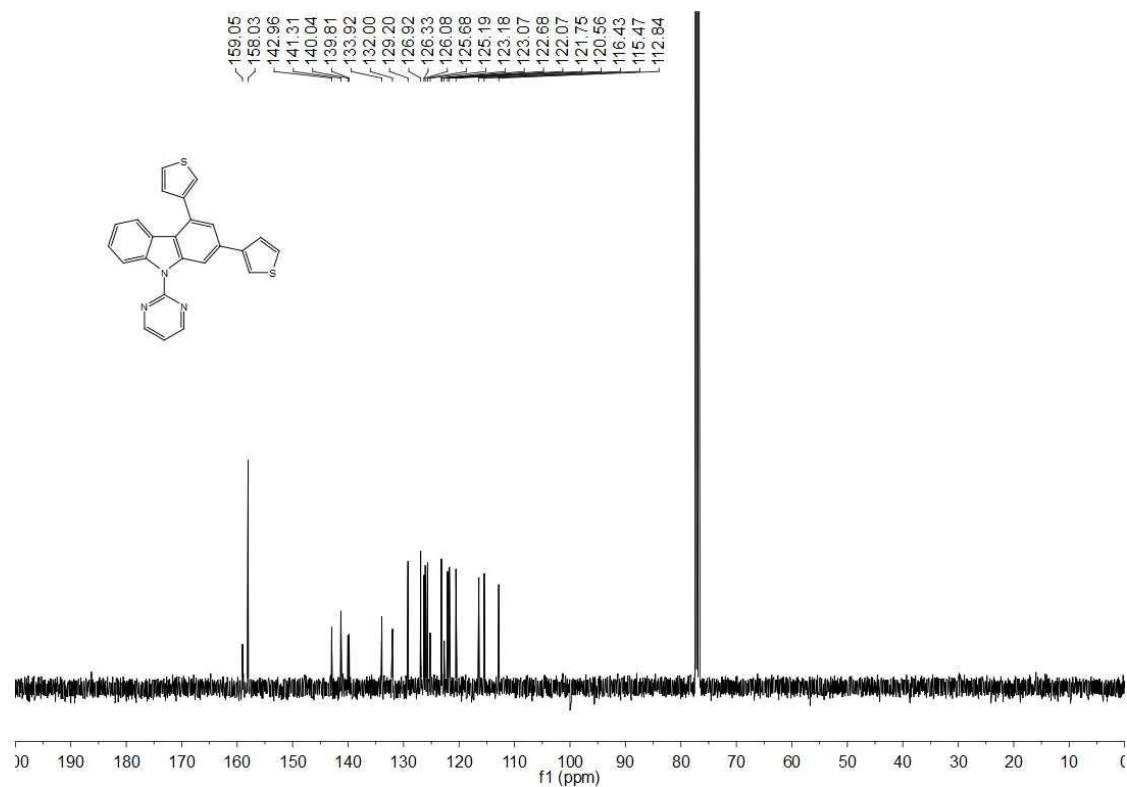

3as

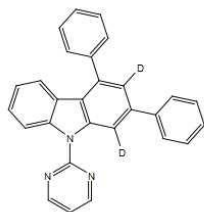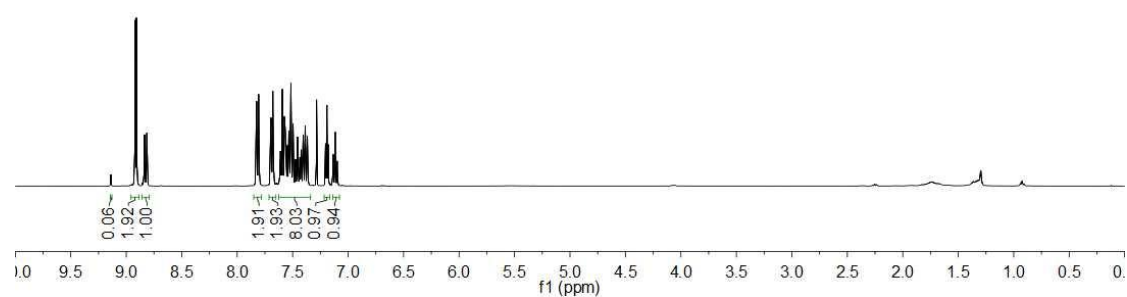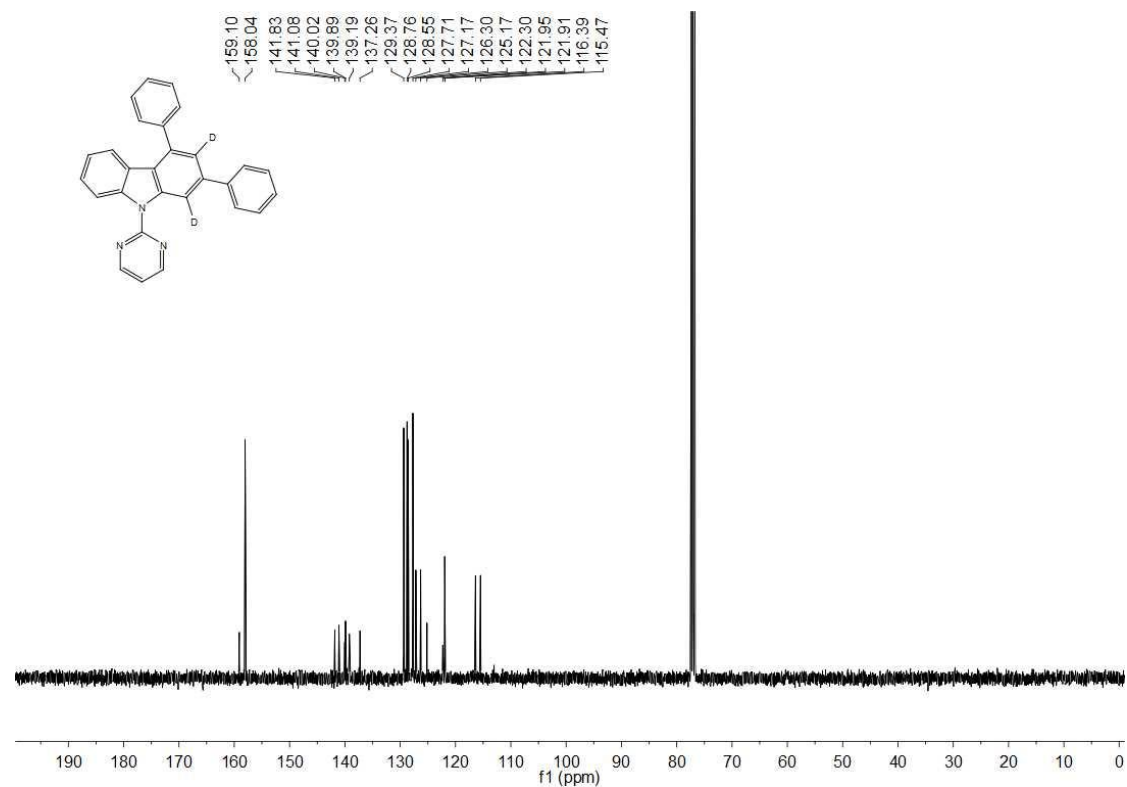

4

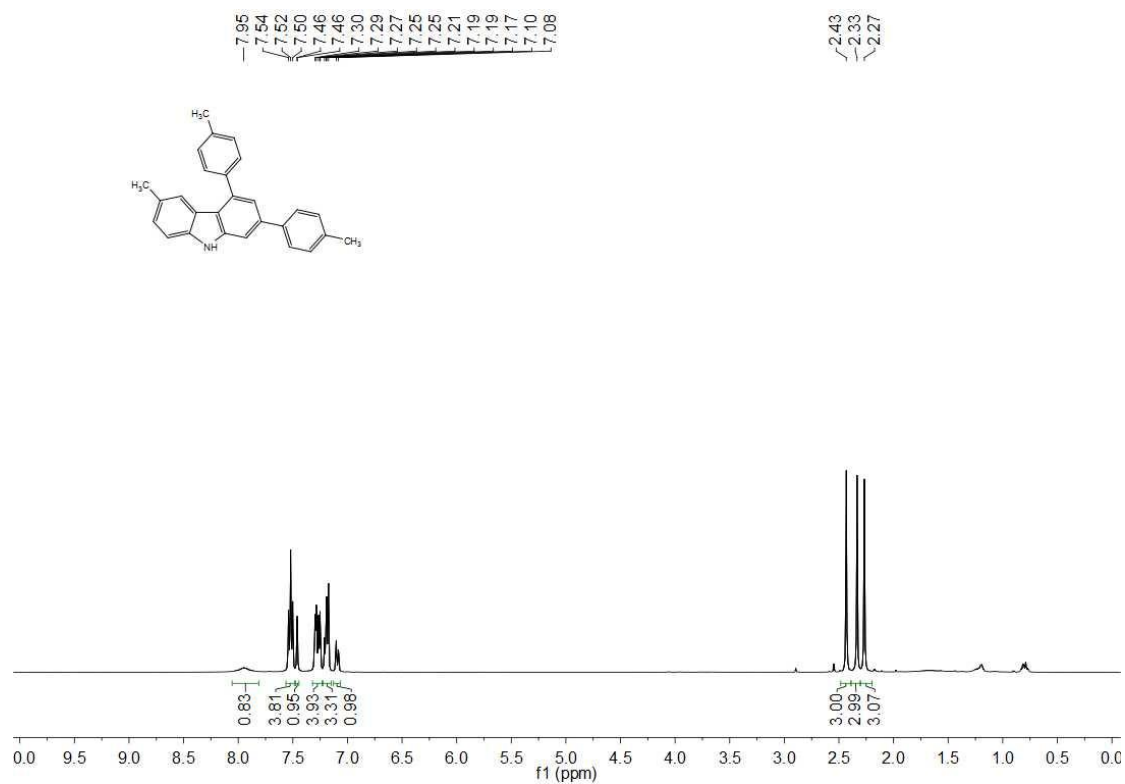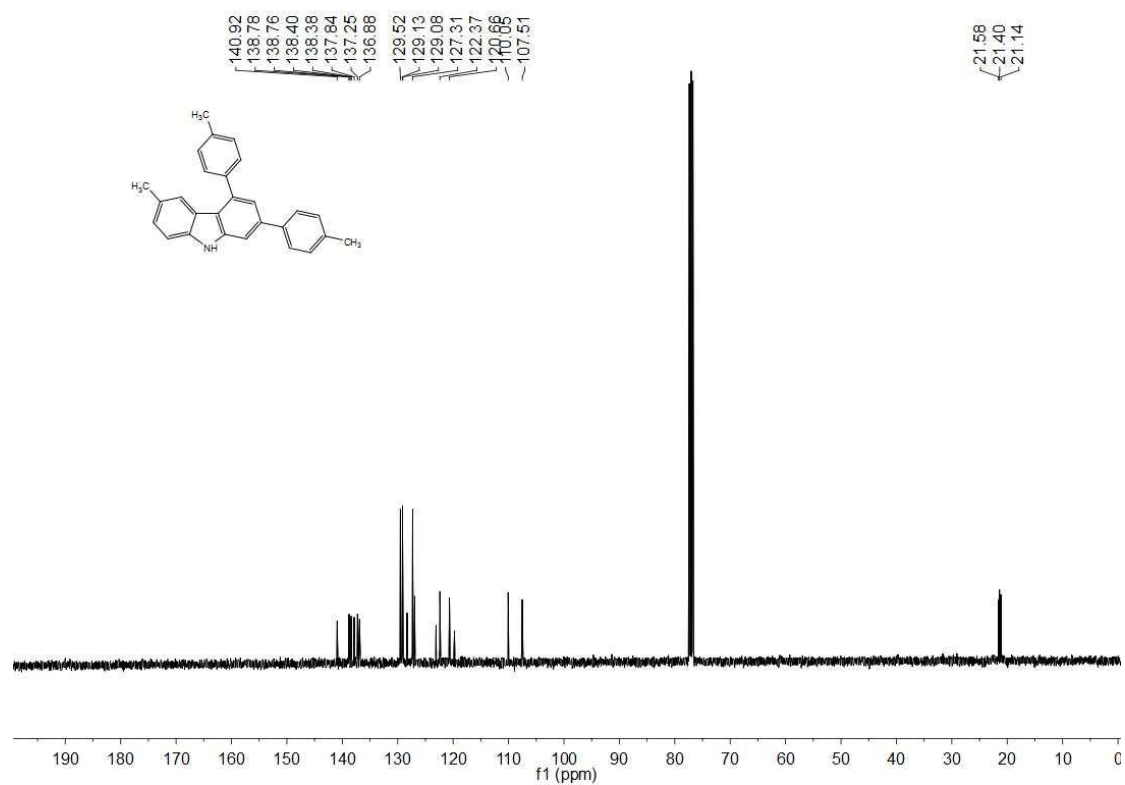

5

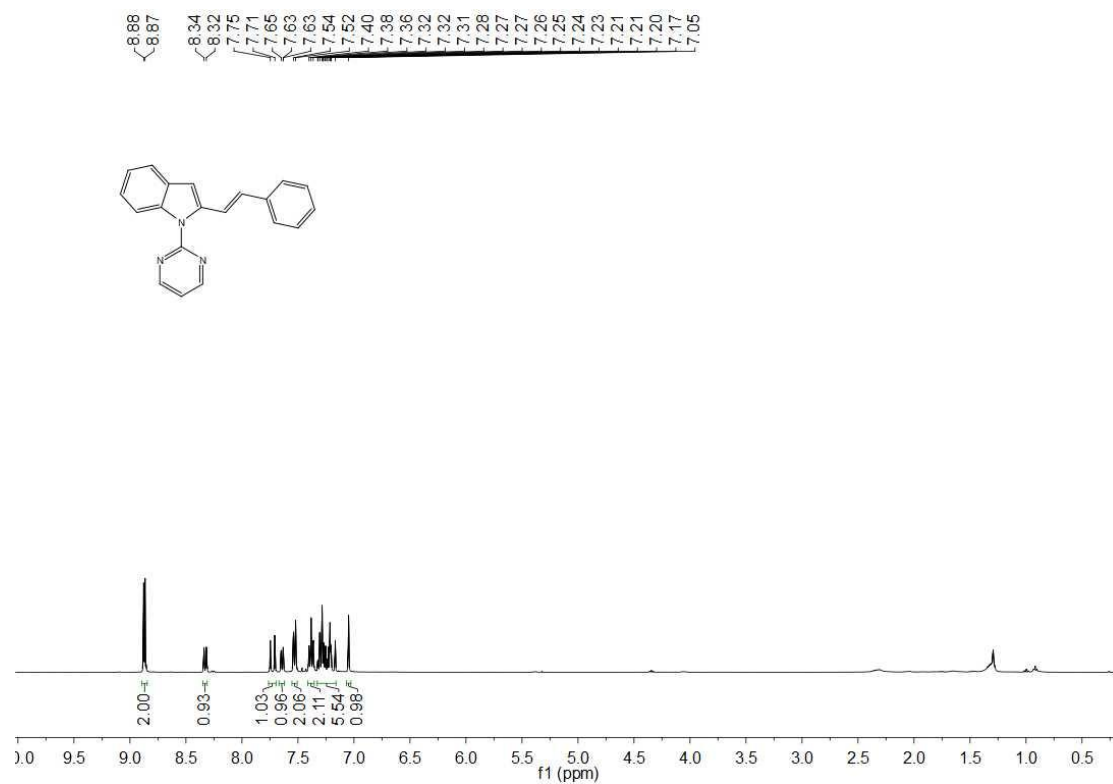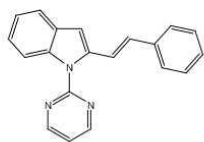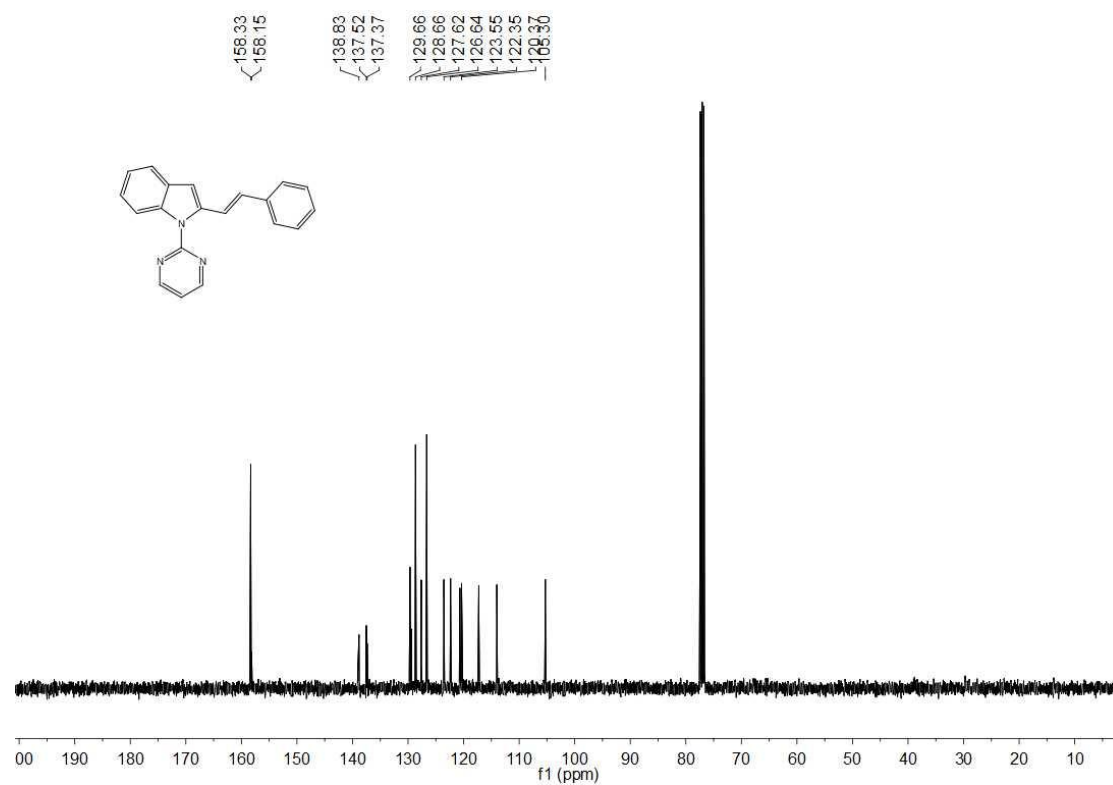

6

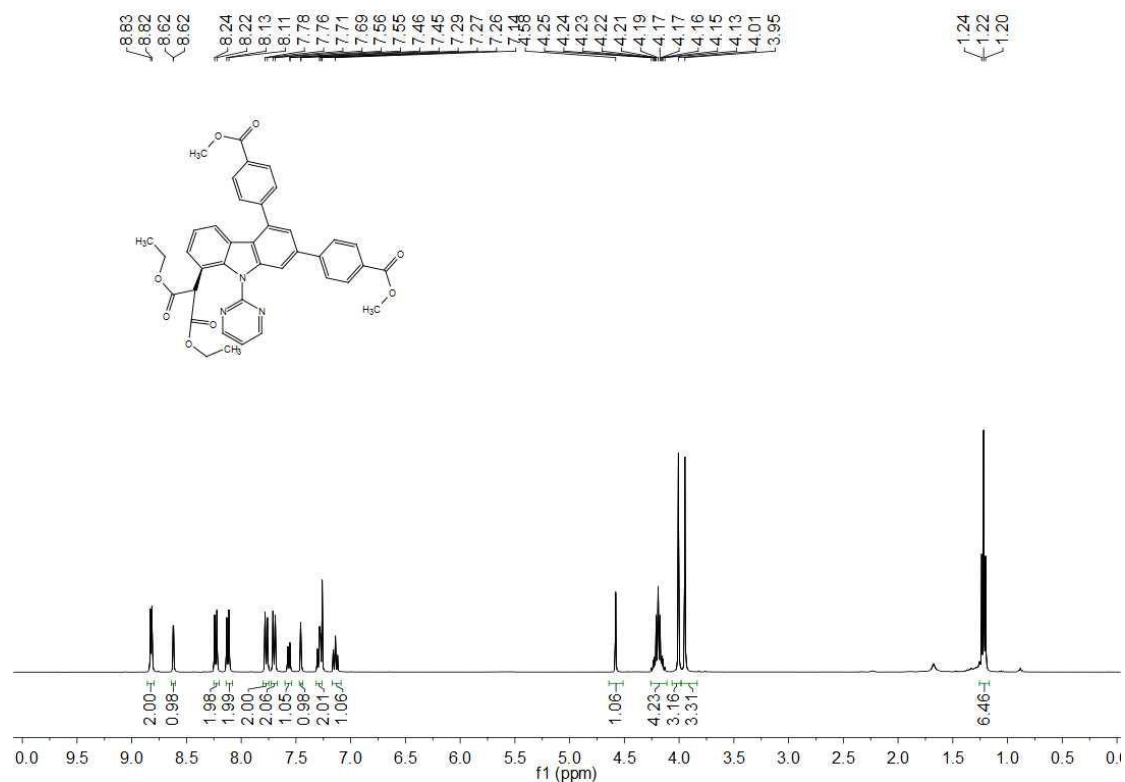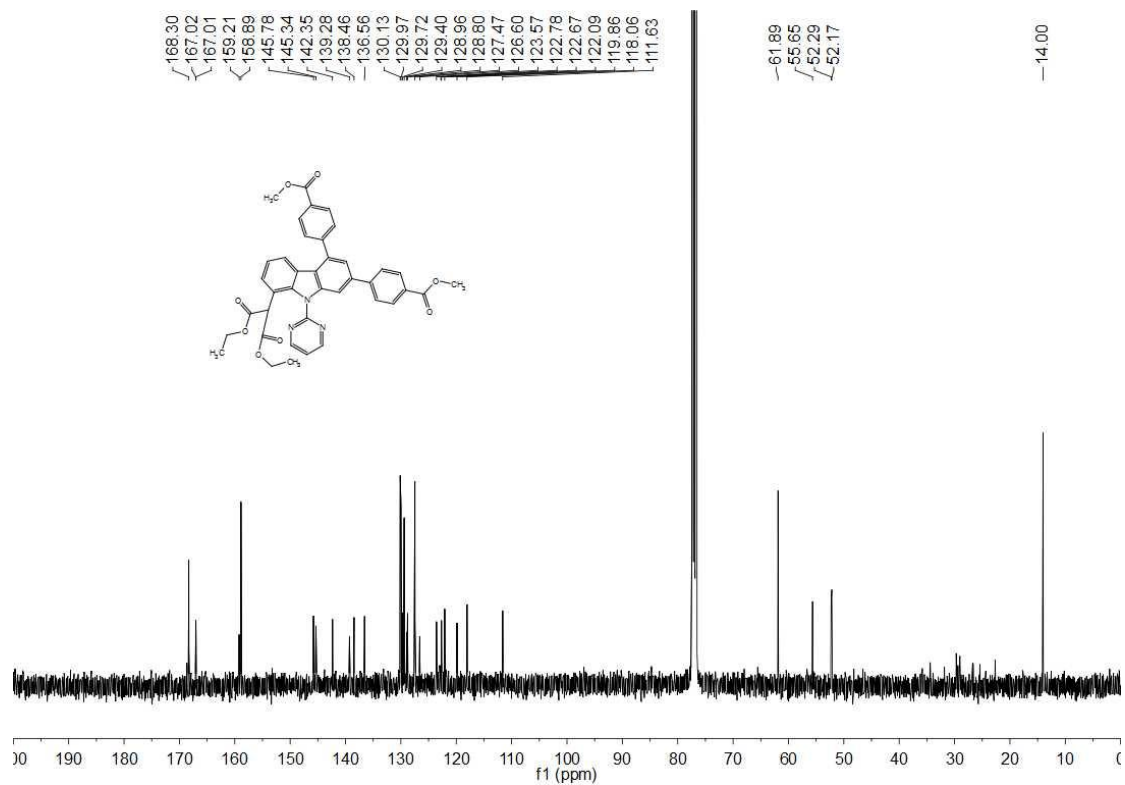

7

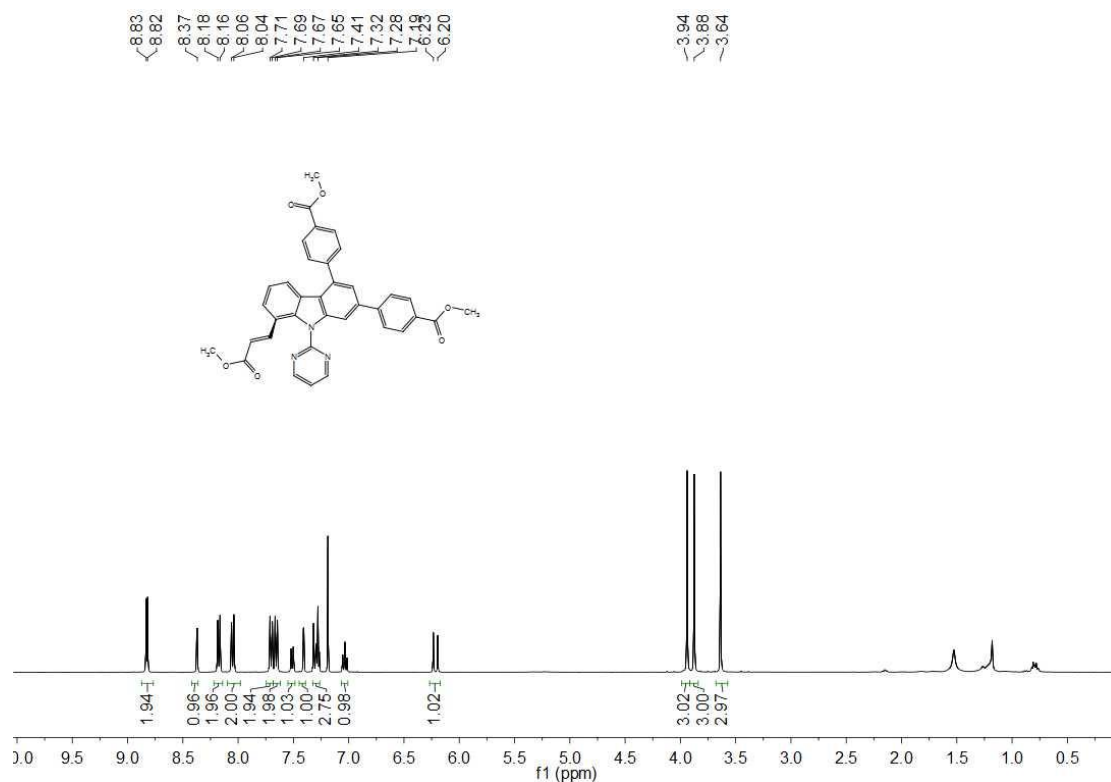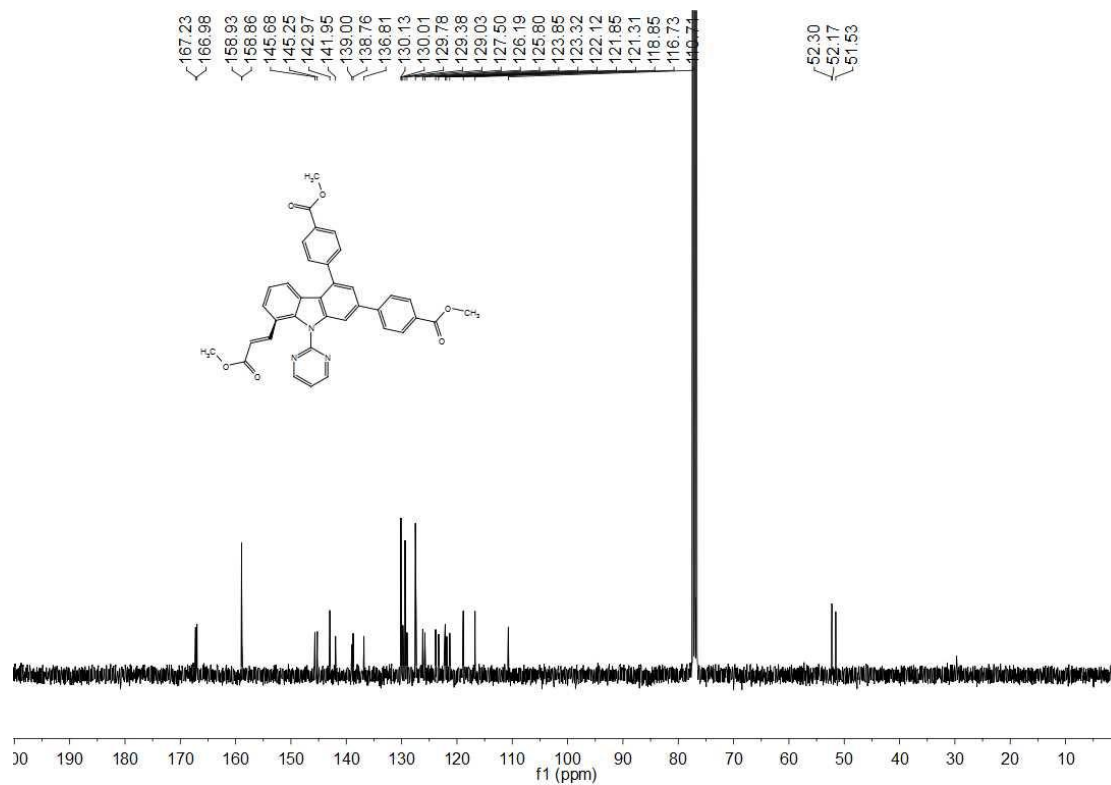

### Crystal data and structure refinement for 3aa (CCDC: 1036782):

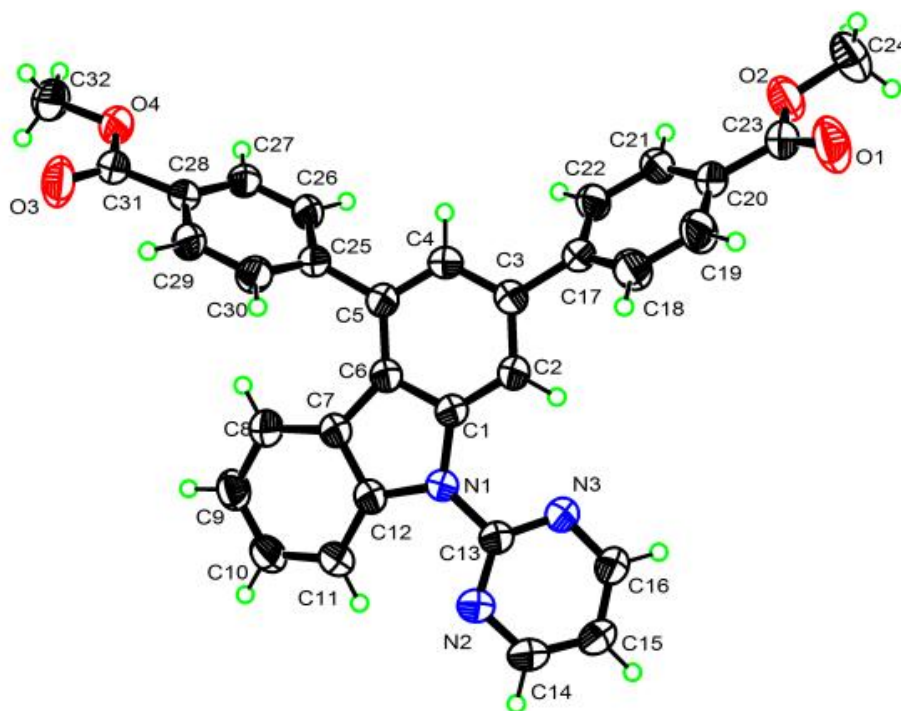

#### Computing details

Data collection: Bruker *APEX2*; cell refinement: Bruker *SAINT*; data reduction: Bruker *SAINT*; program(s) used to solve structure: *SHELXS97* (Sheldrick, 2008); program(s) used to refine structure: *SHELXL97* (Sheldrick, 2008); molecular graphics: Bruker *SHELXTL*; software used to prepare material for publication: Bruker *SHELXTL*.

#### Crystal data

|                                |                                                                                                     |
|--------------------------------|-----------------------------------------------------------------------------------------------------|
| $C_{32}H_{23}N_3O_4$           | $F(000) = 1072$                                                                                     |
| $M_r = 513.53$                 | $D_x = 1.386 \text{ Mg m}^{-3}$<br>$D_m = 1.30 \text{ Mg m}^{-3}$<br>$D_m$ measured by not measured |
| Monoclinic, $P2_1/c$           | Mo <i>K</i> radiation, $\lambda = 0.71073 \text{ \AA}$                                              |
| $a = 27.800 (4) \text{ \AA}$   | Cell parameters from 6169 reflections                                                               |
| $b = 8.1692 (14) \text{ \AA}$  | $\beta = 4.5-54.9^\circ$                                                                            |
| $c = 10.9466 (18) \text{ \AA}$ | $\mu = 0.09 \text{ mm}^{-1}$                                                                        |



|                                |                                         |
|--------------------------------|-----------------------------------------|
| $\alpha = 98.172 (6)^\circ$    | $T = 296 \text{ K}$                     |
| $V = 2460.8 (7) \text{ \AA}^3$ | Prism, colorless                        |
| $Z = 4$                        | $0.3 \times 0.2 \times 0.05 \text{ mm}$ |

#### Data collection

|                                                     |                                                                        |
|-----------------------------------------------------|------------------------------------------------------------------------|
| Bruker APEX-II CCD diffractometer                   | 5660 independent reflections                                           |
| Radiation source: fine-focus sealed tube            | 3975 reflections with $I > 2\sigma(I)$                                 |
| graphite                                            | $R_{\text{int}} = 0.022$                                               |
| $\omega$ and $\phi$ scans                           | $\theta_{\text{max}} = 27.6^\circ$ , $\theta_{\text{min}} = 0.7^\circ$ |
| Absorption correction: multi-scan <i>SADABS</i>     | $h = -36 \text{ } 31$                                                  |
| $T_{\text{min}} = 0.653$ , $T_{\text{max}} = 0.746$ | $k = -10 \text{ } 8$                                                   |
| 21239 measured reflections                          | $l = -14 \text{ } 13$                                                  |

#### Refinement

|                                 |                                                                                     |
|---------------------------------|-------------------------------------------------------------------------------------|
| Refinement on $F^2$             | Primary atom site location: structure-invariant direct methods                      |
| Least-squares matrix: full      | Secondary atom site location: difference Fourier map                                |
| $R[F^2 > 2\sigma(F^2)] = 0.043$ | Hydrogen site location: inferred from neighbouring sites                            |
| $wR(F^2) = 0.123$               | H atoms treated by a mixture of independent and constrained refinement              |
| $S = 1.02$                      | $w = 1/[\sigma^2(F_o^2) + (0.0579P)^2 + 0.4381P]$<br>where $P = (F_o^2 + 2F_c^2)/3$ |
| 5660 reflections                | $(\Delta/\sigma)_{\text{max}} < 0.001$                                              |
| 354 parameters                  | $\Delta_{\text{max}} = 0.17 \text{ e \AA}^{-3}$                                     |
| 0 restraints                    | $\Delta_{\text{min}} = -0.17 \text{ e \AA}^{-3}$                                    |

#### Special details

**Geometry.** All esds (except the esd in the dihedral angle between two l.s. planes)

are estimated using the full covariance matrix. The cell esds are taken into account individually in the estimation of esds in distances, angles and torsion angles; correlations between esds in cell parameters are only used when they are defined by crystal symmetry. An approximate (isotropic) treatment of cell esds is used for estimating esds involving l.s. planes.

**Refinement.** Refinement of  $F^2$  against ALL reflections. The weighted R-factor wR and goodness of fit S are based on  $F^2$ , conventional R-factors R are based on F, with F set to zero for negative  $F^2$ . The threshold expression of  $F^2 > 2\sigma(F^2)$  is used only for calculating R-factors(gt) etc. and is not relevant to the choice of reflections for refinement. R-factors based on  $F^2$  are statistically about twice as large as those based on F, and R-factors based on ALL data will be even larger.

Fractional atomic coordinates and isotropic or equivalent isotropic displacement parameters ( $\text{\AA}^2$ )

|      | x            | y            | z             | $U_{iso}^*/U_{eq}$ |
|------|--------------|--------------|---------------|--------------------|
| O2   | -0.01038 (4) | 0.41094 (17) | -0.22099 (11) | 0.0653 (3)         |
| O4   | 0.45312 (4)  | 0.45390 (15) | -0.19307 (10) | 0.0563 (3)         |
| O3   | 0.48647 (4)  | 0.2820 (2)   | -0.04748 (12) | 0.0795 (4)         |
| O1   | -0.03253 (4) | 0.2247 (2)   | -0.09118 (13) | 0.0874 (5)         |
| N1   | 0.25590 (4)  | 0.52710 (16) | 0.44386 (10)  | 0.0439 (3)         |
| N3   | 0.17873 (5)  | 0.6014 (2)   | 0.48261 (11)  | 0.0585 (4)         |
| N2   | 0.24370 (5)  | 0.5754 (2)   | 0.64580 (12)  | 0.0631 (4)         |
| C24  | -0.05767 (7) | 0.4022 (3)   | -0.2931 (2)   | 0.0788 (6)         |
| H24A | -0.0629      | 0.2940       | -0.3267       | 0.118*             |
| H24B | -0.0597      | 0.4802       | -0.3592       | 0.118*             |
| H24C | -0.0820      | 0.4263       | -0.2417       | 0.118*             |
| C23  | -0.00232 (6) | 0.3148 (2)   | -0.12236 (15) | 0.0537 (4)         |
| C20  | 0.04793 (5)  | 0.3322 (2)   | -0.05728 (13) | 0.0462 (4)         |
| C19  | 0.06138 (6)  | 0.2506 (2)   | 0.05293 (15)  | 0.0613 (5)         |
| H19  | 0.0390       | 0.1846       | 0.0851        | 0.074*             |
| C18  | 0.10781 (6)  | 0.2665 (2)   | 0.11533 (15)  | 0.0583 (5)         |

|      |             |              |               |            |
|------|-------------|--------------|---------------|------------|
| H18  | 0.1162      | 0.2120       | 0.1899        | 0.070*     |
| C17  | 0.14239 (5) | 0.3625 (2)   | 0.06902 (13)  | 0.0435 (3) |
| C3   | 0.19162 (5) | 0.38882 (19) | 0.13763 (13)  | 0.0433 (3) |
| C4   | 0.23259 (5) | 0.38409 (19) | 0.07685 (13)  | 0.0443 (4) |
| H4   | 0.2286      | 0.3580       | -0.0067       | 0.053*     |
| C5   | 0.27893 (5) | 0.41700 (18) | 0.13687 (13)  | 0.0407 (3) |
| C25  | 0.32188 (5) | 0.39751 (18) | 0.07100 (13)  | 0.0396 (3) |
| C30  | 0.35926 (6) | 0.2920 (2)   | 0.11723 (13)  | 0.0471 (4) |
| H30  | 0.3564      | 0.2293       | 0.1868        | 0.056*     |
| C29  | 0.40044 (5) | 0.2791 (2)   | 0.06130 (13)  | 0.0464 (4) |
| H29  | 0.4251      | 0.2079       | 0.0935        | 0.056*     |
| C28  | 0.40548 (5) | 0.37107 (19) | -0.04267 (12) | 0.0403 (3) |
| C31  | 0.45230 (5) | 0.3618 (2)   | -0.09271 (14) | 0.0473 (4) |
| C32  | 0.49838 (6) | 0.4582 (3)   | -0.24321 (18) | 0.0672 (5) |
| H32A | 0.5235      | 0.5018       | -0.1826       | 0.101*     |
| H32B | 0.4948      | 0.5263       | -0.3154       | 0.101*     |
| H32C | 0.5070      | 0.3493       | -0.2650       | 0.101*     |
| C26  | 0.32605 (5) | 0.48262 (19) | -0.03675 (13) | 0.0440 (4) |
| H26  | 0.3006      | 0.5488       | -0.0719       | 0.053*     |
| C27  | 0.36748 (5) | 0.47063 (19) | -0.09259 (13) | 0.0440 (4) |
| H27  | 0.3698      | 0.5298       | -0.1641       | 0.053*     |
| C2   | 0.19652 (5) | 0.4282 (2)   | 0.26263 (13)  | 0.0451 (4) |
| H2   | 0.1699      | 0.4257       | 0.3052        | 0.054*     |
| C1   | 0.24221 (5) | 0.47123 (19) | 0.32187 (12)  | 0.0412 (3) |
| C12  | 0.30656 (5) | 0.55879 (19) | 0.45964 (13)  | 0.0422 (3) |
| C7   | 0.32432 (5) | 0.52473 (18) | 0.34857 (13)  | 0.0412 (3) |
| C6   | 0.28365 (5) | 0.46625 (18) | 0.26123 (13)  | 0.0401 (3) |
| C8   | 0.37312 (5) | 0.5572 (2)   | 0.33978 (15)  | 0.0480 (4) |
| H8   | 0.3854      | 0.5371       | 0.2665        | 0.058*     |
| C9   | 0.40266 (6) | 0.6190 (2)   | 0.44055 (15)  | 0.0538 (4) |
| H9   | 0.4352      | 0.6404       | 0.4355        | 0.065*     |
| C10  | 0.38433 (6) | 0.6498 (2)   | 0.54951 (15)  | 0.0541 (4) |

|     |             |              |               |            |
|-----|-------------|--------------|---------------|------------|
| H10 | 0.4050      | 0.6910       | 0.6167        | 0.065*     |
| C11 | 0.33648 (6) | 0.6215 (2)   | 0.56157 (14)  | 0.0494 (4) |
| H11 | 0.3246      | 0.6433       | 0.6351        | 0.059*     |
| C13 | 0.22435 (5) | 0.56886 (19) | 0.52825 (13)  | 0.0433 (4) |
| C16 | 0.14992 (6) | 0.6454 (3)   | 0.56508 (15)  | 0.0622 (5) |
| H16 | 0.1173      | 0.6664       | 0.5373        | 0.075*     |
| C15 | 0.16618 (6) | 0.6608 (2)   | 0.68730 (15)  | 0.0595 (5) |
| H15 | 0.1459      | 0.6938       | 0.7433        | 0.071*     |
| C14 | 0.21352 (7) | 0.6254 (3)   | 0.72315 (15)  | 0.0694 (5) |
| H14 | 0.2258      | 0.6363       | 0.8063        | 0.083*     |
| C21 | 0.08212 (5) | 0.4273 (2)   | -0.10487 (14) | 0.0484 (4) |
| H21 | 0.0736      | 0.4826       | -0.1790       | 0.058*     |
| C22 | 0.12881 (5) | 0.4406 (2)   | -0.04283 (14) | 0.0492 (4) |
| H22 | 0.1515      | 0.5030       | -0.0768       | 0.059*     |

Atomic displacement parameters ( $\text{\AA}^2$ )

|     | $U^{11}$       | $U^{22}$       | $U^{33}$       | $U^{12}$        | $U^{13}$        | $U^{23}$       |
|-----|----------------|----------------|----------------|-----------------|-----------------|----------------|
| O2  | 0.0423 (6)     | 0.0863 (9)     | 0.0630 (8)     | -0.0093<br>(6)  | -0.0066<br>(5)  | 0.0063 (7)     |
| O4  | 0.0425 (6)     | 0.0793 (8)     | 0.0494 (6)     | 0.0002 (6)      | 0.0140 (5)      | 0.0023 (6)     |
| O3  | 0.0477 (7)     | 0.1137<br>(12) | 0.0791 (9)     | 0.0314 (7)      | 0.0166 (6)      | 0.0196 (8)     |
| O1  | 0.0446 (7)     | 0.1260<br>(13) | 0.0890<br>(10) | -0.0278<br>(8)  | 0.0009 (7)      | 0.0238 (9)     |
| N1  | 0.0359 (6)     | 0.0613 (8)     | 0.0342 (6)     | 0.0012 (6)      | 0.0039 (5)      | -0.0035<br>(6) |
| N3  | 0.0420 (8)     | 0.0936<br>(12) | 0.0401 (7)     | 0.0109 (7)      | 0.0064 (6)      | -0.0013<br>(7) |
| N2  | 0.0502 (8)     | 0.1011<br>(12) | 0.0375 (7)     | 0.0108 (8)      | 0.0041 (6)      | -0.0036<br>(7) |
| C24 | 0.0491<br>(11) | 0.0966<br>(16) | 0.0829<br>(14) | -0.0048<br>(10) | -0.0176<br>(10) | 0.0045<br>(12) |
| C23 | 0.0386 (9)     | 0.0717<br>(12) | 0.0514 (9)     | -0.0055<br>(8)  | 0.0090 (7)      | -0.0066<br>(8) |

|     |                |                |                |                |            |                 |
|-----|----------------|----------------|----------------|----------------|------------|-----------------|
| C20 | 0.0354 (8)     | 0.0597<br>(10) | 0.0440 (8)     | -0.0049<br>(7) | 0.0081 (6) | -0.0074<br>(7)  |
| C19 | 0.0449 (9)     | 0.0844<br>(13) | 0.0550<br>(10) | -0.0195<br>(9) | 0.0081 (8) | 0.0085 (9)      |
| C18 | 0.0485 (9)     | 0.0789<br>(13) | 0.0466 (9)     | -0.0111<br>(8) | 0.0037 (7) | 0.0129 (8)      |
| C17 | 0.0372 (8)     | 0.0551 (9)     | 0.0386 (7)     | -0.0023<br>(7) | 0.0074 (6) | -0.0062<br>(7)  |
| C3  | 0.0374 (8)     | 0.0526 (9)     | 0.0394 (7)     | -0.0013<br>(6) | 0.0036 (6) | -0.0010<br>(7)  |
| C4  | 0.0414 (8)     | 0.0550 (9)     | 0.0364 (7)     | -0.0007<br>(7) | 0.0051 (6) | -0.0050<br>(7)  |
| C5  | 0.0375 (8)     | 0.0465 (8)     | 0.0387 (7)     | 0.0019 (6)     | 0.0070 (6) | -0.0001<br>(6)  |
| C25 | 0.0359 (7)     | 0.0464 (8)     | 0.0365 (7)     | -0.0004<br>(6) | 0.0051 (6) | -0.0058<br>(6)  |
| C30 | 0.0482 (9)     | 0.0528 (9)     | 0.0409 (8)     | 0.0073 (7)     | 0.0087 (6) | 0.0086 (7)      |
| C29 | 0.0422 (8)     | 0.0517 (9)     | 0.0445 (8)     | 0.0124 (7)     | 0.0036 (6) | 0.0028 (7)      |
| C28 | 0.0358 (8)     | 0.0480 (8)     | 0.0363 (7)     | 0.0017 (6)     | 0.0028 (6) | -0.0076<br>(6)  |
| C31 | 0.0379 (8)     | 0.0601<br>(10) | 0.0438 (8)     | 0.0023 (7)     | 0.0055 (7) | -0.0088<br>(7)  |
| C32 | 0.0471<br>(10) | 0.0922<br>(15) | 0.0665<br>(11) | -0.0136<br>(9) | 0.0223 (8) | -0.0069<br>(10) |
| C26 | 0.0370 (8)     | 0.0539 (9)     | 0.0403 (8)     | 0.0100 (7)     | 0.0025 (6) | 0.0039 (7)      |
| C27 | 0.0419 (8)     | 0.0548 (9)     | 0.0356 (7)     | 0.0037 (7)     | 0.0062 (6) | 0.0031 (7)      |
| C2  | 0.0347 (8)     | 0.0618<br>(10) | 0.0396 (8)     | -0.0009<br>(7) | 0.0074 (6) | -0.0010<br>(7)  |
| C1  | 0.0377 (8)     | 0.0510 (9)     | 0.0351 (7)     | 0.0026 (6)     | 0.0059 (6) | -0.0007<br>(6)  |
| C12 | 0.0364 (8)     | 0.0483 (9)     | 0.0409 (8)     | 0.0032 (6)     | 0.0027 (6) | 0.0015 (6)      |
| C7  | 0.0362 (8)     | 0.0469 (8)     | 0.0399 (7)     | 0.0023 (6)     | 0.0031 (6) | 0.0010 (6)      |
| C6  | 0.0358 (8)     | 0.0461 (8)     | 0.0383 (7)     | 0.0015 (6)     | 0.0049 (6) | 0.0008 (6)      |
| C8  | 0.0395 (8)     | 0.0549<br>(10) | 0.0500 (9)     | -0.0018<br>(7) | 0.0076 (7) | -0.0025<br>(7)  |
| C9  | 0.0370 (8)     | 0.0608         | 0.0623         | -0.0049        | 0.0023 (7) | -0.0037         |

|     |                |                |            |                |                |                |
|-----|----------------|----------------|------------|----------------|----------------|----------------|
|     |                | (11)           | (10)       | (7)            |                | (8)            |
| C10 | 0.0443 (9)     | 0.0623<br>(11) | 0.0520 (9) | -0.0019<br>(8) | -0.0052<br>(7) | -0.0064<br>(8) |
| C11 | 0.0446 (9)     | 0.0603<br>(10) | 0.0414 (8) | 0.0024 (7)     | -0.0008<br>(6) | -0.0039<br>(7) |
| C13 | 0.0415 (8)     | 0.0533 (9)     | 0.0354 (7) | 0.0021 (7)     | 0.0067 (6)     | 0.0013 (6)     |
| C16 | 0.0432 (9)     | 0.0961<br>(14) | 0.0484 (9) | 0.0124 (9)     | 0.0109 (7)     | -0.0004<br>(9) |
| C15 | 0.0541<br>(10) | 0.0837<br>(13) | 0.0436 (9) | 0.0095 (9)     | 0.0173 (7)     | -0.0025<br>(8) |
| C14 | 0.0619<br>(11) | 0.1114<br>(17) | 0.0351 (8) | 0.0102<br>(11) | 0.0073 (8)     | -0.0062<br>(9) |
| C21 | 0.0410 (8)     | 0.0633<br>(10) | 0.0402 (8) | -0.0065<br>(7) | 0.0037 (6)     | 0.0006 (7)     |
| C22 | 0.0396 (8)     | 0.0654<br>(11) | 0.0431 (8) | -0.0123<br>(7) | 0.0073 (6)     | 0.0009 (7)     |

Geometric parameters (Å, °)

|          |             |          |             |
|----------|-------------|----------|-------------|
| O2—C23   | 1.328 (2)   | C30—H30  | 0.9300      |
| O2—C24   | 1.436 (2)   | C29—C28  | 1.387 (2)   |
| O4—C31   | 1.3346 (19) | C29—H29  | 0.9300      |
| O4—C32   | 1.4428 (19) | C28—C27  | 1.383 (2)   |
| O3—C31   | 1.1992 (19) | C28—C31  | 1.484 (2)   |
| O1—C23   | 1.202 (2)   | C32—H32A | 0.9600      |
| N1—C13   | 1.4033 (18) | C32—H32B | 0.9600      |
| N1—C1    | 1.4113 (18) | C32—H32C | 0.9600      |
| N1—C12   | 1.4181 (18) | C26—C27  | 1.382 (2)   |
| N3—C13   | 1.3223 (19) | C26—H26  | 0.9300      |
| N3—C16   | 1.3385 (19) | C27—H27  | 0.9300      |
| N2—C13   | 1.3234 (19) | C2—C1    | 1.387 (2)   |
| N2—C14   | 1.337 (2)   | C2—H2    | 0.9300      |
| C24—H24A | 0.9600      | C1—C6    | 1.4096 (19) |
| C24—H24B | 0.9600      | C12—C11  | 1.391 (2)   |
| C24—H24C | 0.9600      | C12—C7   | 1.404 (2)   |

|               |             |               |             |
|---------------|-------------|---------------|-------------|
| C23—C20       | 1.482 (2)   | C7—C8         | 1.399 (2)   |
| C20—C19       | 1.382 (2)   | C7—C6         | 1.454 (2)   |
| C20—C21       | 1.386 (2)   | C8—C9         | 1.375 (2)   |
| C19—C18       | 1.378 (2)   | C8—H8         | 0.9300      |
| C19—H19       | 0.9300      | C9—C10        | 1.385 (2)   |
| C18—C17       | 1.391 (2)   | C9—H9         | 0.9300      |
| C18—H18       | 0.9300      | C10—C11       | 1.375 (2)   |
| C17—C22       | 1.384 (2)   | C10—H10       | 0.9300      |
| C17—C3        | 1.480 (2)   | C11—H11       | 0.9300      |
| C3—C2         | 1.393 (2)   | C16—C15       | 1.356 (2)   |
| C3—C4         | 1.399 (2)   | C16—H16       | 0.9300      |
| C4—C5         | 1.387 (2)   | C15—C14       | 1.350 (2)   |
| C4—H4         | 0.9300      | C15—H15       | 0.9300      |
| C5—C6         | 1.408 (2)   | C14—H14       | 0.9300      |
| C5—C25        | 1.4886 (19) | C21—C22       | 1.381 (2)   |
| C25—C26       | 1.388 (2)   | C21—H21       | 0.9300      |
| C25—C30       | 1.389 (2)   | C22—H22       | 0.9300      |
| C30—C29       | 1.377 (2)   |               |             |
|               |             |               |             |
| C23—O2—C24    | 116.92 (14) | O4—C32—H32C   | 109.5       |
| C31—O4—C32    | 116.40 (13) | H32A—C32—H32C | 109.5       |
| C13—N1—C1     | 126.29 (12) | H32B—C32—H32C | 109.5       |
| C13—N1—C12    | 125.33 (12) | C27—C26—C25   | 121.05 (14) |
| C1—N1—C12     | 107.68 (11) | C27—C26—H26   | 119.5       |
| C13—N3—C16    | 115.66 (13) | C25—C26—H26   | 119.5       |
| C13—N2—C14    | 115.03 (14) | C26—C27—C28   | 120.32 (14) |
| O2—C24—H24A   | 109.5       | C26—C27—H27   | 119.8       |
| O2—C24—H24B   | 109.5       | C28—C27—H27   | 119.8       |
| H24A—C24—H24B | 109.5       | C1—C2—C3      | 118.23 (13) |
| O2—C24—H24C   | 109.5       | C1—C2—H2      | 120.9       |

|                   |             |             |             |
|-------------------|-------------|-------------|-------------|
| H24A—C24—H24<br>C | 109.5       | C3—C2—H2    | 120.9       |
| H24B—C24—H24<br>C | 109.5       | C2—C1—C6    | 121.87 (13) |
| O1—C23—O2         | 123.30 (15) | C2—C1—N1    | 129.06 (13) |
| O1—C23—C20        | 124.80 (17) | C6—C1—N1    | 109.06 (12) |
| O2—C23—C20        | 111.89 (14) | C11—C12—C7  | 121.59 (14) |
| C19—C20—C21       | 118.93 (14) | C11—C12—N1  | 129.43 (14) |
| C19—C20—C23       | 119.54 (14) | C7—C12—N1   | 108.90 (12) |
| C21—C20—C23       | 121.53 (15) | C8—C7—C12   | 119.08 (13) |
| C18—C19—C20       | 120.35 (15) | C8—C7—C6    | 133.48 (14) |
| C18—C19—H19       | 119.8       | C12—C7—C6   | 107.36 (12) |
| C20—C19—H19       | 119.8       | C5—C6—C1    | 119.57 (13) |
| C19—C18—C17       | 121.32 (15) | C5—C6—C7    | 133.39 (13) |
| C19—C18—H18       | 119.3       | C1—C6—C7    | 106.98 (12) |
| C17—C18—H18       | 119.3       | C9—C8—C7    | 119.28 (15) |
| C22—C17—C18       | 117.79 (14) | C9—C8—H8    | 120.4       |
| C22—C17—C3        | 119.88 (13) | C7—C8—H8    | 120.4       |
| C18—C17—C3        | 122.27 (14) | C8—C9—C10   | 120.44 (15) |
| C2—C3—C4          | 120.06 (13) | C8—C9—H9    | 119.8       |
| C2—C3—C17         | 119.08 (13) | C10—C9—H9   | 119.8       |
| C4—C3—C17         | 120.75 (13) | C11—C10—C9  | 122.12 (15) |
| C5—C4—C3          | 122.26 (13) | C11—C10—H10 | 118.9       |
| C5—C4—H4          | 118.9       | C9—C10—H10  | 118.9       |
| C3—C4—H4          | 118.9       | C10—C11—C12 | 117.48 (15) |
| C4—C5—C6          | 117.79 (13) | C10—C11—H11 | 121.3       |
| C4—C5—C25         | 120.33 (13) | C12—C11—H11 | 121.3       |
| C6—C5—C25         | 121.87 (13) | N3—C13—N2   | 126.49 (14) |
| C26—C25—C30       | 118.16 (13) | N3—C13—N1   | 117.12 (13) |
| C26—C25—C5        | 121.85 (13) | N2—C13—N1   | 116.38 (13) |
| C30—C25—C5        | 119.99 (13) | N3—C16—C15  | 122.87 (16) |
| C29—C30—C25       | 120.77 (14) | N3—C16—H16  | 118.6       |
| C29—C30—H30       | 119.6       | C15—C16—H16 | 118.6       |



|                     |              |                    |              |
|---------------------|--------------|--------------------|--------------|
| C25—C30—H30         | 119.6        | C14—C15—C16        | 116.20 (15)  |
| C30—C29—C28         | 120.70 (14)  | C14—C15—H15        | 121.9        |
| C30—C29—H29         | 119.6        | C16—C15—H15        | 121.9        |
| C28—C29—H29         | 119.6        | N2—C14—C15         | 123.68 (16)  |
| C27—C28—C29         | 118.83 (13)  | N2—C14—H14         | 118.2        |
| C27—C28—C31         | 123.03 (14)  | C15—C14—H14        | 118.2        |
| C29—C28—C31         | 118.10 (13)  | C22—C21—C20        | 120.40 (15)  |
| O3—C31—O4           | 122.75 (14)  | C22—C21—H21        | 119.8        |
| O3—C31—C28          | 124.07 (15)  | C20—C21—H21        | 119.8        |
| O4—C31—C28          | 113.18 (13)  | C21—C22—C17        | 121.19 (14)  |
| O4—C32—H32A         | 109.5        | C21—C22—H22        | 119.4        |
| O4—C32—H32B         | 109.5        | C17—C22—H22        | 119.4        |
| H32A—C32—H32<br>B   | 109.5        |                    |              |
|                     |              |                    |              |
| C24—O2—C23—<br>O1   | -0.9 (3)     | C12—N1—C1—C<br>6   | 0.45 (16)    |
| C24—O2—C23—<br>C20  | 178.76 (15)  | C13—N1—C12—<br>C11 | 6.4 (3)      |
| O1—C23—C20—<br>C19  | -5.4 (3)     | C1—N1—C12—C<br>11  | 177.24 (16)  |
| O2—C23—C20—<br>C19  | 174.94 (16)  | C13—N1—C12—<br>C7  | -170.30 (14) |
| O1—C23—C20—<br>C21  | 174.00 (18)  | C1—N1—C12—C<br>7   | 0.55 (17)    |
| O2—C23—C20—<br>C21  | -5.7 (2)     | C11—C12—C7—<br>C8  | -1.0 (2)     |
| C21—C20—C19<br>—C18 | 1.2 (3)      | N1—C12—C7—C<br>8   | 175.95 (14)  |
| C23—C20—C19<br>—C18 | -179.37 (17) | C11—C12—C7—<br>C6  | -178.30 (14) |
| C20—C19—C18<br>—C17 | -0.8 (3)     | N1—C12—C7—C<br>6   | -1.31 (17)   |
| C19—C18—C17<br>—C22 | -0.7 (3)     | C4—C5—C6—C1        | 3.6 (2)      |

|                 |              |                |              |
|-----------------|--------------|----------------|--------------|
| C19—C18—C17—C3  | 176.57 (16)  | C25—C5—C6—C1   | -175.36 (14) |
| C22—C17—C3—C2   | 130.93 (17)  | C4—C5—C6—C7    | -173.15 (16) |
| C18—C17—C3—C2   | -46.2 (2)    | C25—C5—C6—C7   | 7.9 (3)      |
| C22—C17—C3—C4   | -45.3 (2)    | C2—C1—C6—C5    | 0.3 (2)      |
| C18—C17—C3—C4   | 137.57 (17)  | N1—C1—C6—C5    | -178.80 (13) |
| C2—C3—C4—C5     | 0.2 (2)      | C2—C1—C6—C7    | 177.81 (14)  |
| C17—C3—C4—C5    | 176.39 (14)  | N1—C1—C6—C7    | -1.24 (17)   |
| C3—C4—C5—C6     | -3.9 (2)     | C8—C7—C6—C5    | 1.9 (3)      |
| C3—C4—C5—C25    | 175.09 (14)  | C12—C7—C6—C5   | 178.64 (16)  |
| C4—C5—C25—C26   | 58.1 (2)     | C8—C7—C6—C1    | -175.13 (17) |
| C6—C5—C25—C26   | -122.95 (17) | C12—C7—C6—C1   | 1.56 (17)    |
| C4—C5—C25—C30   | -122.01 (16) | C12—C7—C8—C9   | 1.0 (2)      |
| C6—C5—C25—C30   | 57.0 (2)     | C6—C7—C8—C9    | 177.42 (17)  |
| C26—C25—C30—C29 | 3.5 (2)      | C7—C8—C9—C10   | -0.3 (3)     |
| C5—C25—C30—C29  | -176.45 (14) | C8—C9—C10—C11  | -0.4 (3)     |
| C25—C30—C29—C28 | -0.1 (2)     | C9—C10—C11—C12 | 0.4 (3)      |
| C30—C29—C28—C27 | -2.9 (2)     | C7—C12—C11—C10 | 0.3 (2)      |
| C30—C29—C28—C31 | 175.16 (14)  | N1—C12—C11—C10 | -176.01 (15) |
| C32—O4—C31—O3   | -2.2 (2)     | C16—N3—C13—N2  | 0.1 (3)      |
| C32—O4—C31—     | 176.76 (13)  | C16—N3—C13—    | -178.15 (16) |

|                 |              |                 |              |
|-----------------|--------------|-----------------|--------------|
| C28             |              | N1              |              |
| C27—C28—C31—O3  | 176.46 (16)  | C14—N2—C13—N3   | -2.3 (3)     |
| C29—C28—C31—O3  | -1.5 (2)     | C14—N2—C13—N1   | 176.03 (17)  |
| C27—C28—C31—O4  | -2.5 (2)     | C1—N1—C13—N3    | -19.3 (2)    |
| C29—C28—C31—O4  | 179.54 (14)  | C12—N1—C13—N3   | 149.89 (15)  |
| C30—C25—C26—C27 | -3.9 (2)     | C1—N1—C13—N2    | 162.28 (16)  |
| C5—C25—C26—C27  | 176.03 (14)  | C12—N1—C13—N2   | -28.6 (2)    |
| C25—C26—C27—C28 | 0.9 (2)      | C13—N3—C16—C15  | 1.8 (3)      |
| C29—C28—C27—C26 | 2.5 (2)      | N3—C16—C15—C14  | -1.5 (3)     |
| C31—C28—C27—C26 | -175.48 (14) | C13—N2—C14—C15  | 2.6 (3)      |
| C4—C3—C2—C1     | 3.7 (2)      | C16—C15—C14—N2  | -0.9 (3)     |
| C17—C3—C2—C1    | -172.52 (14) | C19—C20—C21—C22 | -0.2 (2)     |
| C3—C2—C1—C6     | -3.9 (2)     | C23—C20—C21—C22 | -179.55 (15) |
| C3—C2—C1—N1     | 174.90 (15)  | C20—C21—C22—C17 | -1.4 (2)     |
| C13—N1—C1—C2    | -7.8 (3)     | C18—C17—C22—C21 | 1.7 (2)      |
| C12—N1—C1—C2    | -178.51 (16) | C3—C17—C22—C21  | -175.55 (14) |
| C13—N1—C1—C6    | 171.19 (14)  |                 |              |
